# Supplementary material for: Genome-Scale Modeling of Light-Driven Reductant Partitioning and Carbon Fluxes in Diazotrophic Unicellular Cyanobacterium Cyanothece sp. ATCC 51142
Source: PLoS Comput Biol. 2012 Apr 5;8(4):e1002460. doi: 10.1371/journal.pcbi.1002460 (PMC3329150; doi:10.1371/journal.pcbi.1002460)
Supplement: Table S2 — Metabolites in the genome-scale metabolic network i Cce806. (XLSX) [file pcbi.1002460.s006.xlsx]

## Sheet: Table S2
Table S2. Metabolites in the genome-scale metabolic network iCce806
Abbreviation	Official name	Formula	Charge	CAS#	Formula neutral	Other name	KEGG ID
10fthf	10-Formyltetrahydrofolate	C20H21N7O7	-2	692-29-5	C20H23N7O7	10-Formyl-THF	C00234
12dgr_CN	1,2-Diacylglycerol (Cyanothece)	C1824H3314O250	0
13dpg	3-Phospho-D-glyceroyl phosphate	C3H4O10P2	-4	None	C3H8O10P2	1,3-bis-phosphoglycerate/ (R)-2-Hydroxy-3-(phosphonooxy)-1-monoanhydride with phosphoric propanoic acid/ 3-Phospho-D-glyceroyl phosphate	C00236
14glun	1,4-alpha-D-Glucan	C6H10O5	0		C6H10O5	(1,4-alpha-D-Glucosyl)n+1/ (1,4-alpha-D-Glucosyl)n/ (1,4-alpha-D-Glucosyl)n-1/ 4-{(1,4)-alpha-D-Glucosyl}(n-1)-D-glucose	C00277
15dap	1,5-Diaminopentane	C5H16N2	2	462-94-2	C5H14N2	Cadaverine/ 1,5-Pentanediamine/ Pentamethylenediamine	C01672
1ag3p_CN	1-Acyl-sn-glycerol 3-phosphate (Cyanothece)	C987H1807O350P50	-100
1ap2ol	1-Aminopropan-2-ol	C3H10NO	1	1867-62-5	C3H9NO		C05771
1ap2olp	D-1-Aminopropan-2-ol O-phosphate	C3H9NO4P	-1	483-34-1	C3H10NO4P		C04122
1p3h5c	L-1-Pyrroline-3-hydroxy-5-carboxylate	C5H6NO3	-1	5255-75-4	C5H7NO3	3-Hydroxy-L-1-pyrroline-5-carboxylate	C04281
1pyr5c	1-Pyrroline-5-carboxylate	C5H6NO2	-1		C5H7NO2	(S)-1-Pyrroline-5-carboxylate/ L-1-Pyrroline-5-carboxylate/ 1-Pyrroline-5-carboxylic acid	C03912
22hop	22-Hopanol	C30H52O	0	7440-38-2		Diplopterol/ 22-Hopanol	C06309
23dhdp	2,3-Dihydrodipicolinate	C7H5NO4	-2		C7H7NO4	Dihydrodipicolinic acid	C03340
23dhmb	(R)-2,3-Dihydroxy-3-methylbutanoate	C5H9O4	-1		C5H10O4	(R)-2,3-Dihydroxy-isovaleric acid/ (R)-2,3-Dihydroxy-isovalerate	C04272
23dhmp	(R)-2,3-Dihydroxy-3-methylpentanoate	C6H11O4	-1		C6H12O4	2,3-Dihydroxy-3-methylvalerate	C06007
25aics	(S)-2-[5-Amino-1-(5-phospho-D-ribosyl)imidazole-4-carboxamido]succinate	C13H15N4O12P	-4		C13H19N4O12P	1-(5'-Phosphoribosyl)-5-amino-4-(N-succinocarboxamide)-imidazole/ 1-(5'-Phosphoribosyl)-4-(N-succinocarboxamide)-5-aminoimidazole/ 5'-Phosphoribosyl-4-(N-succinocarboxamide)-5-aminoimidazole	C04823
25dhpp	2,5-Diamino-6-hydroxy-4-(5'-phosphoribosylamino)-pyrimidine	C9H14N5O8P	-2		C9H16N5O8P	DIAMINO-OH-PHOSPHORIBOSYLAMINO-PYR/ 2,5-diamino-6-hydroxy-4-(5-phosphoribosylamino)pyrimidine/ 2,5-Diamino-6-(ribosylamino)-4-(3H)-pyrimidinone 5'-phosphate	C01304
26dap-LL	LL-2,6-Diaminoheptanedioate	C7H14N2O4	0	583-93-7	C7H14N2O4	LL-2,6-Diaminopimelic acid/ LL-2,6-Diaminopimelate	C00666
26dap-M	meso-2,6-Diaminoheptanedioate	C7H14N2O4	0	None	C7H14N2O4	meso-2,6-Diaminopimelic acid/ meso-2,6-Diaminopimelate	C00680
2ahbut	(S)-2-Aceto-2-hydroxybutanoate	C6H9O4	-1		C6H10O4		C06006
2ahhmd	2-Amino-4-hydroxy-6-hydroxymethyl-7,8-dihydropteridine diphosphate	C7H8N5O8P2	-3	70608-72-9	C7H11N5O8P2	2-Amino-7,8-dihydro-4-hydroxy-6-(diphosphooxymethyl)pteridine/ 2-Amino-4-hydroxy-6-hydroxymethyl-7,8-dihydro pteridine diphosphate/ dihydropterin-CH2OH-diphosphate/ dihydropterin-CH2OH-pp/ 7,8-Dihydropterin pyrophosphate/ 2-Amino-4-hydroxy-6-pyrophosphory	C04807
2ahhmp	2-Amino-4-hydroxy-6-hydroxymethyl-7,8-dihydropteridine	C7H9N5O2	0		C7H9N5O2	6-hydroxymethyl dihydropterin	C01300
2aobut	L-2-Amino-3-oxobutanoate	C4H7NO3	0		C4H7NO3	L-2-Amino-acetoacetate	C03508
2beacp	But-2-enoyl-[acyl-carrier protein]	C4H5OX	0	128-33-6	C4H5OX	But-2-enoyl-[acyl-carrier protein]	C04246
2cpr5p	1-(2-Carboxyphenylamino)-1-deoxy-D-ribulose 5-phosphate	C12H13NO9P	-3		C12H16NO9P		C01302
2dda7p	2-Dehydro-3-deoxy-D-arabino-heptonate 7-phosphate	C7H10O10P	-3		C7H13O10P		C04691
2ddg6p	2-Dehydro-3-deoxy-D-gluconate 6-phosphate	C6H8O9P	-3		C6H11O9P	2-Dehydro-3-deoxy-6-phospho-D-gluconate/ 6-Phospho-2-dehydro-3-deoxy-D-gluconate/ 2-Keto-3-deoxy-6-phosphogluconate	C04442
2dhp	2-Dehydropantoate	C6H9O4	-1		C6H10O4		C00966
2dr5p	2-Deoxy-D-ribose 5-phosphate	C5H9O7P	-2	102916-66-5	C5H11O7P		C00673
2h3opp	2-Hydroxy-3-oxopropanoate	C3H3O4	-1		C3H4O4	Tartronate semialdehyde	C01146
2hbut	2-Hydroxybutyrate	C4H7O3	-1	71-23-8	C4H8O3	2-Hydroxybutyric acid	C05984
2ippm	2-Isopropylmaleate	C7H8O4	-2		C7H10O4	beta-isopropylmaleate	C02631
2mahmp	2-Methyl-4-amino-5-hydroxymethylpyrimidine diphosphate	C6H8N3O7P2	-3	745-65-3	C6H11N3O7P2		C04752
2me4p	2-C-methyl-D-erythritol 4-phosphate	C5H11O7P	-2		C5H13O7P		C11434
2mecdp	2-C-methyl-D-erythritol 2,4-cyclodiphosphate	C5H10O9P2	-2		C5H12O9P2		C11453
2obut	2-Oxobutanoate	C4H5O3	-1	600-18-0	C4H6O3	2-Ketobutyric acid/ 2-Oxobutyric acid/ 2-Oxobutyrate/ 2-Oxobutanoic acid/ alpha-Ketobutyrate	C00109
2p4c2me	2-phospho-4-(cytidine 5'-diphospho)-2-C-methyl-D-erythritol	C14H22N3O17P3	-4		C14H26N3O17P3		C11436
2pg	D-Glycerate 2-phosphate	C3H4O7P	-3		C3H7O7P	2-Phospho-D-glycerate/ 2-phosphoglyceric acid	C00631
2pglyc	2-Phosphoglycolate	C2H2O6P	-3		C2H5O6P	Phosphoglycolic acid/ 2-phosphoglycolic acid	C00988
2shchc	2-Succinyl-6-hydroxy-2,4-cyclohexadiene-1-carboxylate	C11H10O6	-2		C11H12O6		C05817
2tddacp	trans-Dodec-2-enoyl-[acyl-carrier protein]	C12H21OX	0	2148941	C12H21OX	trans-Dodec-2-enoyl-[acp]	C05758
2tdeacp	trans-Dec-2-enoyl-[acyl-carrier protein]	C10H17OX	0	2148941	C10H17OX	trans-Dec-2-enoyl-[acp]/ (2E)-Decenoyl-[acp]	C05754
2theacp	trans-Hex-2-enoyl-[acp]	C6H9OX	0	2148941	C6H9OX	trans-Hex-2-enoyl-[acyl-carrier protein]	C05748
2tocdacp	trans-Octadec-2-enoyl-[acyl-carrier-protein]	C18H33OX	0		C18H33OX
2toceacp	trans-Oct-2-enoyl-[acp]	C8H13OX	0	2148941	C8H13OX	trans-Oct-2-enoyl-[acyl-carrier protein]	C05751
34hpp	3-(4-Hydroxyphenyl)pyruvate	C9H7O4	-1		C9H8O4	4-Hydroxyphenylpyruvate/ p-Hydroxyphenylpyruvic acid	C01179
3c2hmp	3-Carboxy-2-hydroxy-4-methylpentanoate	C7H10O5	-2		C7H12O5	3-Isopropylmalate/ 2-D-threo-hydroxy-3-carboxy-isocaproate	C04411
3c3hmp	3-Carboxy-3-hydroxy-4-methylpentanoate	C7H10O5	-2		C7H12O5	2-Isopropylmalate/ 2-Isopropylmalic acid/ 3-Carboxy-3-hydroxy-isocaproate/ 3-Carboxy-3-hydroxyisocaproate	C02504
3c4mop	3-Carboxy-4-methyl-2-oxopentanoate	C7H8O5	-2		C7H10O5	2-Oxo-4-methyl-3-carboxypentanoate	C04236
3dhq	3-Dehydroquinate	C7H9O6	-1		C7H10O6	5-Dehydroquinate/ 3-Dehydroquinic acid/ 5-Dehydroquinic acid	C00944
3dhsk	3-Dehydroshikimate	C7H7O5	-1	10457-99-5	C7H8O5		C02637
3hbacp	(3R)-3-Hydroxybutanoyl-[acyl-carrier protein]	C4H7O2X	0	320-77-4	C4H7O2X	(3R)-3-Hydroxybutanoyl-[acyl-carrier protein]	C04618
3hddacp	(R)-3-Hydroxydodecanoyl-[acyl-carrier protein]	C12H23O2X	0	2148941	C12H23O2X	(R)-3-Hydroxydodecanoyl-[acp]/ (R)-3-Hydroxydodecanoyl-[acyl-carrier protein]/ D-3-Hydroxydodecanoyl-[acp]/ D-3-Hydroxydodecanoyl-[acyl-carrier protein]	C05757
3hdeacp	(3R)-3-Hydroxydecanoyl-[acyl-carrier protein]	C10H19O2X	0	320-77-4	C10H19O2X	(3R)-3-Hydroxydecanoyl-[acyl-carrier protein]/ (R)-3-Hydroxydecanoyl-[acyl-carrier protein]	C04619
3hhacp	(R)-3-Hydroxyhexanoyl-[acp]	C6H11O2X	0	2148941	C6H11O2X	(R)-3-Hydroxyhexanoyl-[acyl-carrier protein]/ D-3-Hydroxyhexanoyl-[acp]/ D-3-Hydroxyhexanoyl-[acyl-carrier protein]	C05747
3hocacp	(R)-3-Hydroxyoctanoyl-[acyl-carrier protein]	C8H15O2X	0	320-77-4	C8H15O2X	(3R)-3-Hydroxyoctanoyl-[acyl-carrier protein]	C04620
3hocdacp	(3R)-3-Hydroxyoctadecanoyl-[acyl-carrier protein]	C18H35O2X	0		C18H35O2X	(3R)-3-Hydroxyoctadecanoyl-[acp]
3hpaacp	(3R)-3-Hydroxypalmitoyl-[acyl-carrier protein]	C16H31O2X	0	50-29-3	C16H31O2X	(3R)-3-Hydroxypalmitoyl-[acyl-carrier protein]/ (R)-3-Hydroxypalmitoyl-[acyl-carrier protein]/ (3R)-3-Hydroxyhexadecanoyl-[acyl-carrier protein]/ (R)-3-Hydroxyhexadecanoyl-[acyl-carrier protein]	C04633
3htdacp	(3R)-3-Hydroxytetradecanoyl-[acyl-carrier protein]	C14H27O2X	0	35687-86-6	C14H27O2X	(R)-3-Hydroxytetradecanoyl-[acyl-carrier protein]/ beta-hydroxymyristyl-[acyl-carrier protein]/ HMA/ R-3-hydroxy-myristoyl-ACP	C04688
3ig3p	C'-(3-Indolyl)-glycerol 3-phosphate	C11H12NO6P	-2		C11H14NO6P	Indoleglycerol phosphate/ 1-(Indol-3-yl)glycerol 3-phosphate/ (3-Indolyl)-glycerol phosphate	C03506
3mob	3-Methyl-2-oxobutanoate	C5H7O3	-1		C5H8O3	2-Oxoisovalerate/ 2-Oxo-3-methylbutanoate/ 2-Oxoisopentanoate/ 3-Methyl-2-oxobutyric acid/ 2-Ketovaline/ 2-Keto-3-methylbutyric acid/ alpha-Ketovaline	C00141
3mop	(S)-3-Methyl-2-oxopentanoate	C6H9O3	-1		C6H10O3	(R)-2-oxo-3-methylpentanoate/ 2-oxo-3-methylpentanoate/ alpha-keto-beta-methylvalerate/ (S)-2-oxo-3-methylpentanoate/ ketoisoleucine/ alpha-oxo-beta-methylvalerate	C00671
3oxddacp	3-Oxododecanoyl-[acyl-carrier protein]	C12H21O2X	0	2148941	C12H21O2X	3-Oxododecanoyl-[acp]/ 3-Oxododecanoyl-[acyl-carrier protein]	C05756
3oxdeacp	3-Oxodecanoyl-[acyl-carrier protein]	C10H17O2X	0	2148941	C10H17O2X	3-Oxodecanoyl-[acp]	C05753
3oxhacp	3-Oxohexanoyl-[acyl-carrier protein]	C6H9O2X	0	2148941	C6H9O2X	3-Oxohexanoyl-[acp]	C05746
3oxhdacp	3-Oxohexadecanoyl-[acp]	C16H29O2X	0	2148941	C16H29O2X	3-Oxohexadecanoyl-[acp]/ 3-Oxohexadecanoyl-[acyl-carrier protein]	C05762
3oxocacp	3-Oxooctanoyl-[acyl-carrier protein]	C8H13O2X	0	2148941	C8H13O2X	3-Oxooctanoyl-[acp]	C05750
3oxocdacp	3-Oxooctadecanoyl-[acp]	C18H33O2X	0		C18H33O2X	3-Oxooctadecanoyl-[acyl carrier protein]
3oxtdacp	3-Oxotetradecanoyl-[acyl-carrier protein]	C14H25O2X	0	2148941	C14H25O2X	3-Oxotetradecanoyl-[acp]/ 3-Oxotetradecanoyl-[acyl-carrier protein]	C05759
3pg	3-Phospho-D-glycerate	C3H4O7P	-3		C3H7O7P	D-Glycerate 3-phosphate/ 3-Phosphoglycerate/ 3-phosphoglyceric acid	C00197
3php	3-Phosphohydroxypyruvate	C3H2O7P	-3		C3H5O7P	3-Phosphonooxypyruvate/ 3-Phosphonooxypyruvic acid/ 3-Phosphohydroxypyruvic acid	C03232
3psme	5-O-(1-Carboxyvinyl)-3-phosphoshikimate	C10H9O10P	-4		C10H13O10P	3-Phosphate-shikimate/ O5-(1-Carboxyvinyl)-3-phosphoshikimate	C01269
4abz	4-Aminobenzoate	C7H6NO2	-1	150-13-0	C7H7NO2	p-Aminobenzoate	C00568
4adcho	4-amino-4-deoxychorismate	C10H10NO5	-1		C10H11NO5		C11355
4ahmmp	4-Amino-5-hydroxymethyl-2-methylpyrimidine	C6H9N3O	0	73-67-6	C6H9N3O	Toxopyrimidine/ 4-Amino-2-methyl-5-pyrimidinemethanol	C01279
4ampm	4-Amino-2-methyl-5-phosphomethylpyrimidine	C6H8N3O4P	-2		C6H10N3O4P	4-Amino-5-phosphomethyl-2-methylpyrimidine	C04556
4c2me	4-(cytidine 5'-diphospho)-2-C-methyl-D-erythritol	C14H23N3O14P2	-2		C14H25N3O14P2		C11435
4h2oxg	D-4-Hydroxy-2-oxoglutarate	C5H4O6	-2		C5H6O6	D-4-Hydroxy-2-oxoglutaric acid	C05946
4hba	4-Hydroxy-benzyl alcohol	C7H8O2	0		C7H8O2
4hpro-LT	trans-4-Hydroxy-L-proline	C5H9NO3	0	51-35-4	C5H9NO3		C01157
4mop	4-Methyl-2-oxopentanoate	C6H9O3	-1		C6H10O3	2-Oxoisocaproate/ alpha-ketoisocaproate	C00233
4mpetz	4-Methyl-5-(2-phosphoethyl)-thiazole	C6H8NO4PS	-2		C6H10NO4PS	4-Methyl-5-(2-phosphono-oxyethyl)-thiazole	C04327
4pasp	4-Phospho-L-aspartate	C4H6NO7P	-2		C4H8NO7P	L-4-Aspartyl phosphate	C03082
4per	4-Phospho-D-erythronate	C4H6O8P	-3		C4H9O8P		C03393
4ppan	D-4'-Phosphopantothenate	C9H15NO8P	-3		C9H18NO8P	(R)-4'-Phosphopantothenate	C03492
4ppcys	N-((R)-4-Phosphopantothenoyl)-L-cysteine	C12H20N2O9PS	-3		C12H23N2O9PS	(R)-4'-Phosphopantothenoyl-L-cysteine	C04352
4r5au	4-(1-D-Ribitylamino)-5-aminouracil	C9H16N4O6	0		C9H16N4O6	4-(1-D-Ribitylamino)-5-amino-2,6-dihydroxypyrimidine	C04732
5678thh	(6R)-6-(L-erythro-1,2-Dihydroxypropyl)-5,6,7,8-tetrahydro-4a-hydroypterin	C9H14N4O3	0		C9H14N4O3		C06486
5aizc	5-amino-1-(5-phospho-D-ribosyl)imidazole-4-carboxylate	C9H11N3O9P	-3		C9H14N3O9P	1-(5-Phospho-D-ribosyl)-5-amino-4-imidazolecarboxylate/ 1-(5'-Phosphoribosyl)-5-amino-4-imidazolecarboxylate/ 1-(5'-Phosphoribosyl)-5-amino-4-carboxyimidazole/ 5'-Phosphoribosyl-5-amino-4-imidazolecarboxylate/ 1-(5'-Phosphoribosyl)-4-carboxy-5-aminoimidaz	C04751
5aop	5-Amino-4-oxopentanoate	C5H9NO3	0	106-60-5	C5H9NO3	5-Aminolevulinate/ 5-Amino-4-oxovaleric acid	C00430
5aprbu	5-Amino-6-(5'-phosphoribitylamino)uracil	C9H15N4O9P	-2		C9H17N4O9P		C04454
5apru	5-Amino-6-(5'-phosphoribosylamino)uracil	C9H13N4O9P	-2		C9H15N4O9P		C01268
5fothf	5-Formyltetrahydrofolate	C20H21N7O7	-2	58-05-9	C20H23N7O7	L(-)-5-Formyl-5,6,7,8-tetrahydrofolic acid/ Folinic acid	C03479
5mcsn	5-Methylcytosine	C5H7N3O	0	554-01-8	C5H7N3O	2(1H)-Pyrimidinone, 4-amino-5-methyl-	C02376
5mdr1p	5-Methylthio-5-deoxy-D-ribose 1-phosphate	C6H11O7PS	-2		C6H13O7PS	5-Methylthio-D-ribose 1-phosphate/ S5-Methyl-5-thio-D-ribose 1-phosphate	C04188
5mta	5-Methylthioadenosine	C11H15N5O3S	0	2457-80-9	C11H15N5O3S	5'-Methylthioadenosine/ Methylthioadenosine/ 5'-Deoxy-5'-(methylthio)adenosine/ 5'-S-Methylthioadenosine	C00170
5mthf	5-Methyltetrahydrofolate	C20H24N7O6	-1		C20H25N7O6	N5-methyl-tetrahydrofolate/ N5-methyl-5,6,7,8-tetrahydrofolate/ 5-methyl-5,6,7,8-tetrahydrofolate	C00440
5mthglu	5-Methyltetrahydropteroyltri-L-glutamate	C25H34N8O12	-2		C25H36N8O12		C04489
5oxpro	5-Oxoproline	C5H6NO3	-1	98-79-3	C5H7NO3	Pyroglutamic acid/ 5-Pyrrolidone-2-carboxylic acid/ Pyroglutamate	C01879
6pgc	6-Phospho-D-gluconate	C6H10O10P	-3		C6H13O10P	6-phosphogluconic acid/ D-gluconate 6-phosphate	C00345
6pgl	6-phospho-D-glucono-1,5-lactone	C6H9O9P	-2	None	C6H11O9P	D-Glucono-1,5-lactone 6-phosphate	C01236
6pthp	6-Pyruvoyl-5,6,7,8-tetrahydropterin	C9H11N5O3	0		C9H11N5O3	6-Pyruvoyltetrahydropterin/ 6-Pyruvoyl-tetrahydropterin	C03684
78dhp	(6R)-6-(L-erythro-1,2-Dihydroxypropyl)-7,8-dihydro-6H-pterin	C9H12N4O2	0		C9H12N4O2		C06487
8aonn	8-Amino-7-oxononanoate	C9H17NO3	0		C9H17NO3	7-keto-8-aminopelargonate	C01092
9hdeacp	Palmitoleic acid	C16H29OX	0		C16H31OX	cis-9-Hexadecenoic acid
ac	Acetate	C2H3O2	-1	64-19-7	C2H4O2	Acetic acid/ Ethanoic acid/ vinegar/ Ethylic acid/ Vinegar acid/ Methanecarboxylic acid	C00033
acacp	Acetyl-ACP	C2H3OX	0		C2H3OX		C03939
acald	Acetaldehyde	C2H4O	0	75-07-0	C2H4O	Aldehyde C(2)/ acetylaldehyde/ Aceteldehyde/ Acetic aldehyde/ Ethyl aldehyde/ Aldehyde/ Ethanal	C00084
accoa	Acetyl-CoA	C23H34N7O17P3S	-4	72-89-9	C23H38N7O17P3S	Acetyl coenzyme A	C00024
acg5p	N-Acetyl-L-glutamyl 5-phosphate	C7H9NO8P	-3		C7H12NO8P	N-Acetyl-L-glutamate 5-phosphate	C04133
acg5sa	N-Acetyl-L-glutamate 5-semialdehyde	C7H10NO4	-1	None	C7H11NO4	2-Acetamido-5-oxopentanoate	C01250
acgam1p	N-Acetyl-D-glucosamine 1-phosphate	C8H14NO9P	-2	None	C8H16NO9P		C04256
acgam6p	N-Acetyl-D-glucosamine 6-phosphate	C8H14NO9P	-2	102029-88-9	C8H16NO9P		C00357
acglu	N-Acetyl-L-glutamate	C7H9NO5	-2	1188-37-0	C7H11NO5	N-Acetyl-L-glutamic acid	C00624
achms	O-Acetyl-L-homoserine	C6H11NO4	0		C6H11NO4		C01077
acmam	N-Acetyl-D-muramoate	C11H18NO8	-1	91-64-5	C11H19NO8		C05887
acmama	N-Acetyl-D-muramoyl-L-alanine	C14H23N2O9	-1	218084	C14H24N2O9	N-Acetylmuramoyl-Ala	C02999
acmana	N-Acetyl-D-mannosamine	C8H15NO6	0	3615-17-6	C8H15NO6	2-Acetamido-2-deoxy-D-monnose	C00645
acmanap	N-Acetyl-D-mannosamine 6-phosphate	C8H14NO9P	-2	157296-99-6	C8H16NO9P		C04257
acnam	N-Acetylneuraminate	C11H18NO9	-1	131-48-6	C11H19NO9	5-Acetamido-3,5-dideoxy-D-glycero-D-galacto-2-nonulosonic acid/ N-Acetylneuraminic acid	C00270
acorn	N2-Acetyl-L-ornithine	C7H14N2O3	0	None	C7H14N2O3		C00437
acp	Acyl carrier protein	HX	0		HX		C00229
acser	O-Acetyl-L-serine	C5H9NO4	0	66638-22-0	C5H9NO4	O3-Acetyl-L-serine	C00979
actacp	Acetoacetyl-ACP	C4H5O2X	0	2148941	C4H5O2X	Acetoacetyl-[acyl-carrier protein]/ Acetoacetyl-[acp]	C05744
actp	Acetyl phosphate	C2H3O5P	-2	19926-71-7	C2H5O5P		C00227
adcoba	Adenosyl cobinamide	C58H84CoN16O11	1		C58H84CoN16O11		C06508
adcobap	Adenosyl cobinamide phosphate	C58H83CoN16O14P	-1		C58H85CoN16O14P		C06509
adcobdam	Adenosyl cobyrinate diamide	C55H68CoN11O15	-4		C55H73CoN11O15		C06506
adcobhex	Adenosyl-cobyric acid	C55H76CoN15O11	0		C55H77CoN15O11		C06507
ade	Adenine	C5H5N5	0	73-24-5	C5H5N5	A/ Ade/ 1H-Purin-6-amine/ Adeninimine/ Vitamin B4/ 6-Aminopurine	C00147
adgcoba	Adenosine-GDP-cobinamide	C68H95CoN21O21P2	-1	7625-23-2	C68H97CoN21O21P2		C06510
adn	Adenosine	C10H13N5O4	0	58-61-7	C10H13N5O4	Adenine riboside/ 9-beta-D-Ribofuranosyladenine/ Adenocard/ 9-B-D-ribofuranosyl-9H-purin-6-amine/ rA	C00212
adp	ADP	C10H12N5O10P2	-3	20398-34-9	C10H15N5O10P2	Adenosine 5'-diphosphate	C00008
adpglc	ADPglucose	C16H23N5O15P2	-2		C16H25N5O15P2	Adenosine diphosphoglucose	C00498
adprib	ADPribose	C15H21N5O14P2	-2		C15H23N5O14P2	adenine-diphosphate-ribose	C00301
ahcys	S-Adenosyl-L-homocysteine	C14H20N6O5S	0	979-92-0	C14H20N6O5S	S-Adenosylhomocysteine	C00021
ahdt	2-Amino-4-hydroxy-6-(erythro-1,2,3-trihydroxypropyl)dihydropteridine triphosphate	C9H12N5O13P3	-4		C9H16N5O13P3		C04895
aicar	5-Amino-1-(5-Phospho-D-ribosyl)imidazole-4-carboxamide	C9H13N4O8P	-2	3031-94-5	C9H15N4O8P	1-(5'-Phosphoribosyl)-5-amino-4-imidazolecarboxamide/ 5'-Phosphoribosyl-5-amino-4-imidazolecarboxamide/ 5'-Phospho-ribosyl-5-amino-4-imidazole carboxamide/ AICAR/ 5-Aminoimidazole-4-carboxamide ribotide/ 5-Phosphoribosyl-4-carbamoyl-5-aminoimidazole	C04677
air	5-amino-1-(5-phospho-D-ribosyl)imidazole	C8H12N3O7P	-2	25635-88-5	C8H14N3O7P	Aminoimidazole ribotide/ AIR/ 1-(5'-Phosphoribosyl)-5-aminoimidazole/ 5'-Phosphoribosyl-5-aminoimidazole/ 1-(5-Phospho-D-ribosyl)-5-aminoimidazole	C03373
akg	2-Oxoglutarate	C5H4O5	-2	328-50-7	C5H6O5	Oxoglutaric acid/ 2-Ketoglutaric acid/ 2-Oxopentanedioic acid/ alpha-Ketoglutarate/ alpha-Ketoglutaric Acid	C00026
alaala	D-Alanyl-D-alanine	C6H12N2O3	0	923-16-0	C6H12N2O3		C00993
ala-B	beta-Alanine	C3H7NO2	0	107-95-9	C3H7NO2	3-aminopropionic acid/ 3-Aminopropanoate	C00099
alac-S	(S)-2-Acetolactate	C5H7O4	-1		C5H8O4	(S)-2-Hydroxy-2-methyl-3-oxobutanoate	C06010
ala-D	D-Alanine	C3H7NO2	0	338-69-2	C3H7NO2	D-2-Aminopropionic acid	C00133
ala-L	L-Alanine	C3H7NO2	0	56-41-7	C3H7NO2	L-2-Aminopropionic acid/ L-alpha-Alanine	C00041
alatrna	L-Alanyl-tRNA(Ala)	C3H7NO2X	1		C3H6NO2X	L-Alanyl-tRNA	C00886
amet	S-Adenosyl-L-methionine	C15H23N6O5S	1	29908-03-0	C15H23N6O5S	Acylcarnitine/ S-Adenosylmethionine	C00019
amob	S-Adenosyl-4-methylthio-2-oxobutanoate	C15H19N5O6S	0		C15H20N5O6S		C04425
amopbut-L	2-Amino-3-oxo-4-phosphonooxybutyrate	C4H6NO7P	-2		C4H8NO7P	L-2-Amino-3-oxo-4-phosphonooxybutyrate	C07335
amoppro	3-Amino-2-oxopropyl phosphate	C3H6NO5P	-2		C3H8NO5P	1-Amino-3-(phosphohydroxy)propan-2-one	C11638
amp	AMP	C10H12N5O7P	-2	61-19-8	C10H14N5O7P	Adenosine 5'-monophosphate/ Adenylic acid/ Adenylate/ 5'-AMP/ 5'-Adenylic acid/ 5'-Adenosine monophosphate/ Adenosine 5'-phosphate	C00020
anth	Anthranilate	C7H6NO2	-1	118-92-3	C7H7NO2	Vitamin L/ Anthranilic acid/ o-Aminobenzoic acid/ Vitamin L1/ 2-Aminobenzoate	C00108
ap4a	P1,P4-Bis(5'-adenosyl) tetraphosphate	C20H24N10O19P4	-4			AppppA	C01260
apoacp	Apoprotein [acyl carrier protein]	RHO	0		RHO		C03688
aps	Adenosine 5'-phosphosulfate	C10H12N5O10PS	-2		C10H14N5O10PS	Adenylylsulfate/ APS	C00224
arg-L	L-Arginine	C6H15N4O2	1	74-79-3	C6H14N4O2	(S)-2-Amino-5-guanidinovaleric acid/ Arginine/ Arg	C00062
arg-L-asp-L	L-arginine-L-aspartate monomer of cyanophycin	C10H20N5O5	1		C10H23N5O6
argsuc	N(omega)-(L-Arginino)succinate	C10H17N4O6	-1	None	C10H18N4O6	N-(L-Arginino)succinate/ L-Argininosuccinate/ L-Argininosuccinic acid/ L-Arginosuccinic acid	C03406
argtrna	L-Arginyl-tRNA(Arg)	C6H15N4O2X	2		C6H13N4O2X	L-Arginyl-tRNA	C02163
arsna	Arsenate	AsHO4	-2	7778-39-4	AsH3O4	Arsenic acid/ Orthoarsenic acid	C01478
arsni2	Arsenite	AsH3O3	0	15502-74-6	AsH3O3		C06697
asn-L	L-Asparagine	C4H8N2O3	0	70-47-3	C4H8N2O3	2-Aminosuccinamic acid/ Arg/ 2-Amino-3-carbamoylpropanoic acid	C00152
asntrna	L-Asparaginyl-tRNA(Asn)	C4H8N2O3X	1		C4H7N2O3X		C03402
asp-L	L-Aspartate	C4H6NO4	-1	56-84-8	C4H7NO4	L-Aspartic acid/ 2-aminosuccinic acid/ Asp	C00049
aspsa	L-Aspartate 4-semialdehyde	C4H7NO3	0	None	C4H7NO3	Aspartate beta-semialdehyde/ L-Aspartic 4-semialdehyde	C00441
asptrna	L-Aspartyl-tRNA(Asp)	C4H6NO4X	0		C4H6NO4X		C02984
atp	ATP	C10H12N5O13P3	-4	56-65-5	C10H16N5O13P3	Adenosine 5'-triphosphate/ 5'-adenylate triphosphate	C00002
btamp	Biotinyl-5'-AMP	C20H27N7O9PS	-1		C20H28N7O9PS		C05921
btn	Biotin	C10H15N2O3S	-1	58-85-5	C10H16N2O3S	Vitamin B7/ D-Biotin/ Vitamin H/ Coenzyme R	C00120
butacp	Butyryl-[acyl-carrier protein]	C4H7OX	0	2148941	C4H7OX	Butyryl-[acp]/ Butyryl-[acyl-carrier protein]	C05745
ca2	Calcium	Ca	2	7440-70-2	Ca	Ca2+	C00076
cbasp	N-Carbamoyl-L-aspartate	C5H6N2O5	-2		C5H8N2O5		C00438
cbp	Carbamoyl phosphate	CH2NO5P	-2		CH4NO5P		C00169
cdp	CDP	C9H12N3O11P2	-3	63-38-7	C9H15N3O11P2	Cytidine 5'-diphosphate/ Cytidine diphosphate	C00112
cdpdag_CN	CDPDiacylglycerol (Cyanothece)	C2274H3864O750P100N150	-100
cell	Cellulose	C6H10O5	0	9004-34-6	C6H10O5	(1,4-beta-D-Glucosyl)n-1/ 1,4-beta-D-Glucan/ (1,4-beta-D-Glucosyl)n+1/ (1,4-beta-D-Glucosyl)n	C00760
cgly	Cys-Gly	C5H10N2O3S	0	19246-18-5	C5H10N2O3S	L-Cysteinylglycine	C01419
chla	Chlorophyll a	C55H72MgN4O5	2	479-61-8	C55H72MgN4O5
chor	Chorismate	C10H8O6	-2	55508-12-8	C10H10O6	Chorismic acid	C00251
cico	2-Methylmaleate	C5H4O4	-2		C5H6O4	Citraconic acid;/ Citraconate;/ Methylmaleic acid/ 2-Methylmaleate;	C02226
cima	Citramalate	C5H6O5	-2		C5H8O5	D-Citramalate;/ (3R)-Citramalate;/ (2R)-2-Hydroxy-2-methylbutanedioate/ (R)-2-Methylmalate;/ D-Citramalic acid;/ D-alpha-Hydroxypyrotartaric acid;/ (R)-2-Methylmalic acid;/ (3R)-alpha-Hydroxypyrotartaric acid;/ (3R)-Citramalic acid;	C02612
cit	Citrate	C6H5O7	-3	77-92-9	C6H8O7	2-Hydroxy-1,2,3-propanetricarboxylic acid/ Citric acid/ 2-Hydroxytricarballylic acid	C00158
citr-L	L-Citrulline	C6H13N3O3	0	372-75-8	C6H13N3O3	N5-(aminocarbonyl)-L-Ornithine/ Citrulline/ 2-Amino-5-ureidovaleric acid	C00327
clpyda	Chlorophyllide a	C35H33MgN4O5	1	14897-06-4	C35H34MgN4O5	Chlorophyllide	C02139
cmp	CMP	C9H12N3O8P	-2	84-52-6	C9H14N3O8P	Cytidine-5'-monophosphate/ Cytidylic acid/ 3'-Cytidylic Acid/ cytidine 3'-phosphate/ Cytidine-2'(3')-monophosphoric acid/ Cytidine-2[(3[)-monophosphoric acid	C00055
cmpacna	CMP-N-acetylneuraminate	C20H29N4O16P	-2	3063-71-6	C20H31N4O16P		C00128
co1dam	Cob(I)yrinate a,c diamide	C45H59CoN6O12	-4		C45H64CoN6O12	Cob(I)yrinate a,c diamide/ Cob(I)yrinate diamide	C06505
co2	CO2	CO2	0	124-38-9	CO2	Carbonic anhydride/ Carbon dioxide	C00011
co2dam	Cob(II)yrinate a,c diamide	C45H59CoN6O12	-3	7625-23-2	C45H64CoN6O12	Cob(II)yrinic acid a,c-diamide/ Cob(II)yrinate diamide	C06504
coa	Coenzyme A	C21H32N7O16P3S	-4	85-61-0	C21H36N7O16P3S	CoA-SH/ CoA/ CoASH	C00010
cobalt2	Co2+	Co	2	7440-48-4	Co	Cobalt	C00175
cobamcoa	Cobamide coenzyme	C72H100CoN18O17P	0		C72H101CoN18O17P		C00194
cpppg3	Coproporphyrinogen III	C36H40N4O8	-4	2624-63-7	C36H44N4O8		C03263
creat	Creatine	C4H9N3O2	0	57-00-1	C4H9N3O2	alpha-Methylguanidino acetic acid/ Methylglycocyamine	C00300
crtn	Creatinine	C4H7N3O	0	60-27-5	C4H7N3O	1-Methylglycocyamidine	C00791
csn	Cytosine	C4H5N3O	0	71-30-7			C00380
ctp	CTP	C9H12N3O14P3	-4	65-47-4	C9H16N3O14P3	Cytidine 5'-triphosphate/ Cytidine triphosphate	C00063
cu2	Cu2+	Cu	2		Cu	Copper	C00070
cyc6_ox	Cytochrome c6 (oxidized form)	FeX	3		FeX
cyc6_rd	Cytochrome c6 (reduced form)	FeX	2
cys-L	L-Cysteine	C3H7NO2S	0	52-90-4	C3H7NO2S	Cys/ L-2-Amino-3-mercaptopropionic acid	C00097
cystrna	L-Cysteinyl-tRNA(Cys)	C3H7NO2SX	1		C3H6NO2SX		C03125
cytd	Cytidine	C9H13N3O5	0	65-46-3		4-amino-1-beta-D-ribofuranosyl-2(1H)-pyrimidinone/ 1-beta-ribofuranosylosine/ cytosine riboside	C00475
dad-2	Deoxyadenosine	C10H13N5O3	0	958-09-8		2'-Deoxyadenosine/ dA	C00559
dad-5	5'-Deoxyadenosine	C10H13N5O3	0		C10H13N5O3		C05198
dadp	dADP	C10H12N5O9P2	-3	None	C10H15N5O9P2	2'-Deoxyadenosine 5'-diphosphate	C00206
damp	dAMP	C10H12N5O6P	-2	653-63-4	C10H14N5O6P	2'-Deoxyadenosine 5'-phosphate/ 2'-Deoxyadenosine 5'-monophosphate/ Deoxyadenylic acid/ Deoxyadenosine monophosphate	C00360
dann	7,8-Diaminononanoate	C9H21N2O2	1		C9H20N2O2		C01037
datp	dATP	C10H12N5O12P3	-4	1927-31-7	C10H16N5O12P3	2'-Deoxyadenosine 5'-triphosphate/ Deoxyadenosine 5'-triphosphate/ Deoxyadenosine triphosphate	C00131
db4p	3,4-dihydroxy-2-butanone 4-phosphate	C4H7O6P	-2		C4H9O6P	3,4-dihydroxy-2-butanone-4-P/ DIHYDROXY-BUTANONE-P
dcamp	N6-(1,2-Dicarboxyethyl)-AMP	C14H14N5O11P	-4		C14H18N5O11P	Adenylosuccinate/ Adenylosuccinic acid	C03794
dcdp	dCDP	C9H12N3O10P2	-3	None	C9H15N3O10P2	2'-Deoxycytidine diphosphate/ 2'-Deoxycytidine 5'-diphosphate	C00705
dcmp	dCMP	C9H12N3O7P	-2	1032-65-1	C9H14N3O7P	Deoxycytidylic acid/ Deoxycytidine monophosphate/ Deoxycytidylate/ 2'-Deoxycytidine 5'-monophosphate	C00239
dctp	dCTP	C9H12N3O13P3	-4	2056-98-6	C9H16N3O13P3	Deoxycytidine 5'-triphosphate/ Deoxycytidine triphosphate/ 2'-Deoxycytidine 5'-triphosphate	C00458
dcyt	Deoxycytidine	C9H13N3O4	0	951-77-9		2'-Deoxycytidine/ dC	C00881
ddcaacp	Dodecanoyl-ACP (n-C12:0ACP)	C12H23OX	0		C12H23OX
decacp	Decanoyl-[acyl-carrier protein]	C10H19OX	0	2148941	C10H19OX	Decanoyl-[acp]/ Decanoyl-ACP (n-C10:0ACP)	C05755
dgdg_CN	Digalactosyldiacylglycerol (Cyanothece)	C2424H4314O750	0		C2424H4314O750
dgdp	dGDP	C10H12N5O10P2	-3		C10H15N5O10P2	2'-Deoxyguanosine 5'-diphosphate	C00361
dgmp	dGMP	C10H12N5O7P	-2	902-04-5	C10H14N5O7P	2'-Deoxyguanosine 5'-monophosphate/ 2'-Deoxyguanosine 5'-phosphate/ Deoxyguanylic acid/ Deoxyguanosine monophosphate	C00362
dgsn	Deoxyguanosine	C10H13N5O4	0	961-07-9	C10H13N5O4	2'-deoxyguanosine hemihydrate/ 2'-Deoxyguanosine	C00330
dgtp	dGTP	C10H12N5O13P3	-4	2564-35-4	C10H16N5O13P3	2'-Deoxyguanosine 5'-triphosphate/ Deoxyguanosine 5'-triphosphate/ Deoxyguanosine triphosphate	C00286
dha	Dihydroxyacetone	C3H6O3	0	96-26-4		Glycerone/ 1,3-Dihydroxypropan-2-one/ 1,3-Dihydroxy-2-propanone/ 1,3-Dihydroxyacetone	C00184
dhap	Dihydroxyacetone phosphate	C3H5O6P	-2	57-04-5	C3H7O6P	Glycerone phosphate	C00111
dhf	7,8-Dihydrofolate	C19H19N7O6	-2	4033-27-6	C19H21N7O6	7,8-Dihydrofolic acid/ Dihydrofolate/ Dihydrofolic acid	C00415
dhna	1,4-Dihydroxy-2-naphthoate	C11H7O4	-1		C11H8O4		C03657
dhnpt	2-Amino-4-hydroxy-6-(D-erythro-1,2,3-trihydroxypropyl)-7,8-dihydropteridine	C9H13N5O4	0			Dihydroneopterin	C04874
dhor-S	(S)-Dihydroorotate	C5H5N2O4	-1	5988-19-2	C5H6N2O4	L-Dihydroorotate/ (S)-4,5-Dihydroorotate/ L-Dihydroorotic acid/ Dihydro-L-orotic acid	C00337
dhpt	Dihydropteroate	C14H13N6O3	-1		C14H14N6O3	7,8-Dihydropteroate	C00921
din	Deoxyinosine	C10H12N4O4	0	890-38-0		2'-deoxy-inosine	C05512
dmlz	6,7-Dimethyl-8-(1-D-ribityl)lumazine	C13H18N4O6	0		C13H18N4O6		C04332
dmphq	2-Phytyl-1,4-naphthoquinone	C30H44O2	0		C30H44O2	Demethylphylloquinone	C13309
dmpp	Dimethylallyl diphosphate	C5H9O7P2	-3	358-71-4	C5H12O7P2	2-Isopentenyl diphosphate/ delta2-Isopentenyl diphosphate/ Prenyl diphosphate/ dimethylallyl pyrophosphate	C00235
dna_CN	DNA, Cyanothece 51142	C981H1131N369O600P100	-100		C981H1231N369O600P100
dnad	Deamino-NAD+	C21H24N6O15P2	-2		C21H27N6O15P2	Deamido-NAD+	C00857
dpcoa	Dephospho-CoA	C21H33N7O13P2S	-2		C21H35N7O13P2S		C00882
dplpt	Diploptene	C30H50	0	7440-38-2		22(29)-Hopane/ Diploptene	C06310
drib	Deoxyribose	C5H10O4	0	533-67-5	C5H10O4	2-Deoxy-beta-D-erythro-pentose/ Thyminose/ 2-Deoxy-D-ribose	C01801
dtbt	Dethiobiotin	C10H17N2O3	-1		C10H18N2O3	Desthiobiotin	C01909
dtdp	dTDP	C10H13N2O11P2	-3		C10H16N2O11P2	Thymidine 5'-diphosphate	C00363
dtdp6dm	dTDP-6-deoxy-L-mannose	C16H24N2O15P2	-2	572-96-3	C16H26N2O15P2	dTDP-6-deoxy-L-mannose/ dTDP-L-rhamnose	C03319
dtdpddg	dTDP-4-dehydro-6-deoxy-D-glucose	C16H22N2O15P2	-2		C16H24N2O15P2	dTDP-4-oxo-6-deoxy-D-glucose	C00687
dtdpddm	dTDP-4-dehydro-6-deoxy-L-mannose	C16H22N2O15P2	-2		C16H24N2O15P2	dTDP-4-oxo-L-rhamnose/ dTDP-4-oxo-6-deoxy-L-mannose	C00688
dtdpglc	dTDPglucose	C16H24N2O16P2	-2		C16H26N2O16P2	dTDP-D-glucose	C00842
dtmp	dTMP	C10H13N2O8P	-2	365-07-1	C10H15N2O8P	Thymidine 5'-phosphate/ Deoxythymidine 5'-phosphate/ Thymidylic acid/ 5'-Thymidylic acid/ Thymidine monophosphate/ Deoxythymidylic acid/ Thymidylate	C00364
dtpcudcpp	di-trans,poly-cis-Undecaprenyl diphosphate	C55H89O7P2	-3		C55H92O7P2		C04574
dttp	dTTP	C10H13N2O14P3	-4		C10H17N2O14P3	Thymidine triphosphate/ Thymidine 5'-triphosphate/ TTP	C00459
dudp	dUDP	C9H11N2O11P2	-3		C9H14N2O11P2	2'-Deoxyuridine 5'-diphosphate	C01346
dump	dUMP	C9H11N2O8P	-2	964-26-1	C9H13N2O8P	Deoxyuridylic acid/ Deoxyuridine monophosphate/ Deoxyuridine 5'-phosphate/ 2'-Deoxyuridine 5'-phosphate	C00365
duri	Deoxyuridine	C9H12N2O5	0	951-78-0		2-Deoxyuridine/ 2'-Deoxyuridine	C00526
dutp	dUTP	C9H11N2O14P3	-4		C9H15N2O14P3	2'-Deoxyuridine 5'-triphosphate	C00460
dvpc	Divinylprotochlorophyllide	C35H29MgN4O5	1		C35H30MgN4O5		C11831
dxyl5p	1-deoxy-D-xylulose 5-phosphate	C5H9O7P	-2		C5H11O7P		C11437
e4h2oxg	L-erythro-4-Hydroxyglutamate	C5H8NO5	-1		C5H9NO5		C05947
e4p	D-Erythrose 4-phosphate	C4H7O7P	-2	585-18-2	C4H9O7P	4-phospho D-erythrose	C00279
eig3p	D-erythro-1-(Imidazol-4-yl)glycerol 3-phosphate	C6H9N2O6P	-2		C6H11N2O6P	D-erythro-Imidazole-glycerol 3-phosphate/ D-erythro-Imidazole-glycerol phosphate	C04666
emma	D-erythro-3-Methylmalate	C5H6O5	-2		C5H8O5		C06032
etoh	Ethanol	C2H6O	0	64-17-5		Ethyl alcohol/ Methylcarbinol	C00469
f1p	D-Fructose 1-phosphate	C6H11O9P	-2	15978-08-2	C6H13O9P	Fructose 1-phosphate/ Fructofuranose 1-phosphate	C02976
f6p	D-Fructose 6-phosphate	C6H11O9P	-2	643-13-0	C6H13O9P	D-Fructose 6-phosphoric acid/ Neuberg ester/ beta-D-Fructose 6-phosphate	C00085
fad	FAD	C27H31N9O15P2	-2	146-14-5	C27H33N9O15P2	Riboflavine 5'-adenosine diphosphate/ FAD/ Flavin adenine dinucleotide	C00016
fadh2	FADH2	C27H33N9O15P2	-2		C27H35N9O15P2	flavin adenine dinucleotide (reduced form)	C01352
fdp	D-Fructose 1,6-bisphosphate	C6H10O12P2	-4	488-69-7	C6H14O12P2	fructose-1,6-bisphosphate/ fructose diphosphate/ beta-D-fructofuranose-1,6-diphosphate	C00354
fe2	Fe2+	Fe	2	None	Fe	Iron/ Reduced Iron/ Iron dication/ Fe(II)	C00023
fe3	Fe3+	Fe	3	None	Fe	Iron trication/ Fe(III)	C00023
fgam	N2-Formyl-N1-(5-phospho-D-ribosyl)glycinamide	C8H13N2O9P	-2		C8H15N2O9P	5'-Phosphoribosyl-N-formylglycinamide/ N-Formyl-GAR/ N-Formylglycinamide ribonucleotide	C04376
fmet	N-Formyl-L-methionine	C6H10NO3S	-1	4289-98-9	C6H11NO3S		C03145
fmettrna	N-Formylmethionyl-tRNA	C6H11NO3SX	1		C6H10NO3SX		C03294
fmn	Flavin mononucleotide	C17H19N4O9P	-2	146-17-8	C17H21N4O9P	Riboflavin-5-phosphate/ Flavin mononucleotide/ FMN	C00061
fpram	2-(Formamido)-N1-(5-phospho-D-ribosyl)acetamidine	C8H14N3O8P	-2		C8H16N3O8P	2-(Formamido)-N1-(5'-phosphoribosyl)acetamidine/ 1-(5'-Phosphoribosyl)-N-formylglycinamidine/ 5'-Phosphoribosyl-N-formylglycinamidine/ 5'-Phosphoribosylformylglycinamidine	C04640
fprica	5-Formamido-1-(5-phospho-D-ribosyl)imidazole-4-carboxamide	C10H13N4O9P	-2		C10H15N4O9P	1-(5'-Phosphoribosyl)-5-formamido-4-imidazolecarboxamide/ 5'-Phosphoribosyl-5-formamido-4-imidazolecarboxamide/ 5-Formamido-1-(5-phosphoribosyl)imidazole-4-carboxamide	C04734
frdp	Farnesyl diphosphate	C15H25O7P2	-3	13058-04-3	C15H28O7P2	Farnesyl pyrophosphate/ 2-trans,6-trans-Farnesyl diphosphate/ trans,trans-Farnesyl diphosphate	C00448
fru	D-Fructose	C6H12O6	0	57-48-7		Levulose/ Fruit sugar/ D-Arabino-hexulose	C00095
fum	Fumarate	C4H2O4	-2	110-17-8	C4H4O4	boletic acid/ allomaleic acid/ Fumaric acid/ Trans-butenedioic acid	C00122
g1p	D-Glucose 1-phosphate	C6H11O9P	-2	59-56-3	C6H13O9P	Cori ester/ alpha-D-Glucose 1-phosphate/ Glucose 1-phosphate	C00103
g3p	Glyceraldehyde 3-phosphate	C3H5O6P	-2	142-10-9	C3H7O6P	D-Glyceraldehyde 3-phosphate	C00661
g6p	D-Glucose 6-phosphate	C6H11O9P	-2	56-73-5	C6H13O9P	alpha-D-Glucose 6-phosphate/ Glucose 6-phosphate/ Robinson ester	C00092
gal	D-Galactose	C6H12O6	0	59-23-4		alpha-Galactose(D)/ Galactose	C00124
gal1p	alpha-D-Galactose 1-phosphate	C6H11O9P	-2	2255-14-3	C6H13O9P	D-Galactose 1-phosphate/ alpha-D-Galactose 1-phosphate	C00446
gam1p	D-Glucosamine 1-phosphate	C6H13NO8P	-1		C6H14NO8P		C06156
gam6p	D-Glucosamine 6-phosphate	C6H13NO8P	-1	3616-42-0	C6H14NO8P	D-Glucosamine phosphate	C00352
gar	N1-(5-Phospho-D-ribosyl)glycinamide	C7H14N2O8P	-1		C7H15N2O8P	5'-Phosphoribosylglycinamide/ GAR/ Glycinamide ribonucleotide	C03838
gcald	Glycolaldehyde	C2H4O2	0		C2H4O2	Hydroxyacetaldehyde	C00266
gdp	GDP	C10H12N5O11P2	-3	146-91-8	C10H15N5O11P2	Guanosine 5'-diphosphate/ Guanosine diphosphate	C00035
gdpddm	GDP-4-dehydro-6-deoxy-D-mannose	C16H21N5O15P2	-2		C16H23N5O15P2	GDP-4-dehydro-6-deoxy-D-mannose/ GDP-4-dehydro-6-deoxy-D-talose/ GDP-4-oxo-6-deoxy-D-mannose/ GDP-4-dehydro-D-rhamnose	C01222
gdpdp	Guanosine 3',5'-bis(diphosphate)	C10H11N5O17P4	-6		C10H17N5O17P4	Guanosine 3'-diphosphate 5'-diphosphate	C01228
gdpfuc	GDP-L-fucose	C16H23N5O15P2	-2		C16H25N5O15P2		C00325
gdpman	GDP-D-mannose	C16H23N5O16P2	-2		C16H25N5O16P2		C00096
gdptp	Guanosine 3'-diphosphate 5'-triphosphate	C10H11N5O20P5	-7		C10H18N5O20P5	guanosine 5'-diphosphate 3'-triphosphate	C04494
ggdp	Geranylgeranyl diphosphate	C20H33O7P2	-3		C20H36O7P2	Geranylgeranyl pyrophosphate/ all-trans-Geranylgeranyl diphosphate/ all-trans-Geranylgeranyl pyrophosphate	C00353
glc-D	D-Glucose	C6H12O6	0	50-99-7	C6H12O6	Grape sugar/ Dextrose/ alpha-D-Glucose/ beta-D-Glucose/ Glucose	C00031
glcdg_CN	Monoglucosyldiacylglycerol (Cyanothece)	C2124H3814O500	0
glcn-D	D-Gluconate	C6H11O7	-1	526-95-4	C6H12O7	Dextronic Acid/ D-Gluconic acid/ D-Gluco-hexonic acid	C00257
gln-L	L-Glutamine	C5H10N2O3	0	56-85-9	C5H10N2O3	L-2-Aminoglutaramic acid/ Gln	C00064
glntrna	L-Glutaminyl-tRNA(Gln)	C5H10N2O3X	1		C5H9N2O3X	Glutaminyl-tRNA	C02282
glu1sa	L-Glutamate 1-semialdehyde	C5H9NO3	0	None	C5H9NO3	(S)-4-Amino-5-oxopentanoate	C03741
glu5p	L-Glutamate 5-phosphate	C5H8NO7P	-2		C5H10NO7P	L-Glutamyl 5-phosphate	C03287
glu5sa	L-Glutamate 5-semialdehyde	C5H9NO3	0	None	C5H9NO3	L-Glutamate gamma-semialdehyde	C01165
gluala	(5-L-Glutamyl)-L-amino acid	C8H13N2O5	-1	1460-57-7	C7H11N2O5R	L-gamma-Glutamyl-L-amino acid	C03740
glucys	gamma-L-Glutamyl-L-cysteine	C8H13N2O5S	-1	686-58-8	C8H14N2O5S	L-gamma-Glutamylcysteine/ 5-L-Glutamyl-L-cysteine	C00669
glu-D	D-Glutamate	C5H8NO4	-1	56-86-0	C5H9NO4	Glu/ D-Glutamic acid/ D-Glutaminic acid/ D-2-Aminoglutaric acid	C00217
glu-L	L-Glutamate	C5H8NO4	-1	56-86-0	C5H9NO4	L-Glutamic acid/ L-Glutaminic acid/ Glu	C00025
glutrna	L-Glutamyl-tRNA(Glu)	C5H8NO4X	0	None	C5H8NO4X		C02987
glx	Glyoxylate	C2H1O3	-1	298-12-4	C2H2O3	Glyoxalate/ Glyoxylic acid/ Acetic acid	C00048
gly	Glycine	C2H5NO2	0	56-40-6	C2H5NO2	Aminoacetic acid/ Gly	C00037
glyald	D-Glyceraldehyde	C3H6O3	0	453-17-8		(R)-glyceraldehyde	C00577
glyc	Glycerol	C3H8O3	0	56-81-5	C3H8O3	1,2,3-trihydroxypropane/ 1,2,3-propanetriol/ Glycerin	C00116
glyc3p	sn-Glycerol 3-phosphate	C3H7O6P	-2	57-03-4	C3H9O6P	Glycerophosphoric acid/ Phosphatidyl glycerol/ sn-Gro-1-P/ Glycerol-3-phosphate	C00093
glyclt	Glycolate	C2H3O3	-1	79-14-1	C2H4O3	Glycolic acid/ Hydroxyacetic acid	C00160
glycogen	Glycogen	C6H10O5	0		C6H10O5		C00182
glyc-R	(R)-Glycerate	C3H5O4	-1	473-81-4	C3H6O4	D-Glycerate/ Glycerate/ Glyceric acid	C00258
glytrna	Glycyl-tRNA(Gly)	C2H5NO2X	1		C2H4NO2X		C02412
gmh7p	D-Glycero-D-manno-heptose 7-phosphate	C7H13O10P	-2		C7H15O10P	C07836	C07836
gmp	GMP	C10H12N5O8P	-2	85-32-5	C10H14N5O8P	Guanosine 5'-phosphate/ Guanosine monophosphate/ Guanosine 5'-monophosphate/ Guanylic acid	C00144
grdp	Geranyl diphosphate	C10H17O7P2	-3		C10H20O7P2		C00341
gsn	Guanosine	C10H13N5O5	0	118-00-3		rG/ Guanine riboside	C00387
gthox	Oxidized glutathione	C20H30N6O12S2	-2		C20H32N6O12S2	L-Glutathione oxidized/ Glutathione disulfide	C00127
gthrd	Reduced glutathione	C10H16N3O6S	-1	70-18-8	C10H17N3O6S	Glutathione/ 5-L-Glutamyl-L-cysteinylglycine/ N-(N-gamma-L-Glutamyl-L-cysteinyl)glycine/ gamma-L-Glutamyl-L-cysteinyl-glycine	C00051
gtp	GTP	C10H12N5O14P3	-4	86-01-1	C10H16N5O14P3	Guanosine 5'-triphosphate	C00044
gua	Guanine	C5H5N5O	0	73-40-5	C5H5N5O	2-Aminohypoxanthine/ G/ 2-Amino-6-hydroxypurine	C00242
h	H+	H	1	12408-02-5	H	Hydrogen Ion/ Proton	C00080
h2	H2	H2	0	1333-74-0	H2	Hydrogen	C00282
h2mb4p	1-hydroxy-2-methyl-2-(E)-butenyl 4-diphosphate	C5H9O8P2	-3		C5H12O8P2		C11811
h2o	H2O	H2O	0	7732-18-5	H2O	Water/ Dihydrogen oxide	C00001
h2o2	Hydrogen peroxide	H2O2	0	7722-84-1	H2O2	peroxide/ hydrogen dioxide/ H2O2	C00027
h2s	Hydrogen sulfide	HS	-1	2148878	H2S	Hydrogen-sulfide/ H2S	C00283
hcit	Homocitrate	C7H7O7	-3		C7H10O7	2-Hydroxybutane-1,2,4-tricarboxylate/ Homocitric acid/ 3-Hydroxy-3-carboxyadipic acid	C01251
hco3	Bicarbonate	CHO3	-1	71-52-3	CH2O3	HCO3-/ Hydrogencarbonate/ Acid carbonate	C00288
hcys-L	L-Homocysteine	C4H9NO2S	0	6027-13-0	C4H9NO2S	L-Homocysteine/ L-2-Amino-4-mercaptobutyric acid	C00155
hdeacp	Hexadecenoyl-ACP (n-C16:1ACP)	C16H29OX	0		C16H29OX
hemeA	Heme A	C49H54FeN4O6	-6		C49H56FeN4O6
hemeO	Heme O	C49H56FeN4O5	-2	137397-56-9	C49H58FeN4O5
hexacp	Hexanoyl-[acyl-carrier protein]	C6H11OX	0	2148941	C6H11OX	Hexanoyl-[acp]	C05749
hgbam	Hydrogenobyrinate a,c diamide	C45H58N6O12	-4		C45H62N6O12	Hydrogenobyrinic acid a,c diamide/ Hydrogenobyrinate diamide	C06503
hgbyr	Hydrogenobyrinate	C45H54N4O14	-6		C45H60N4O14	Hydrogenobyrinic acid	C06399
hgentis	Homogentisate	C8H7O4	-1	451-13-8	C8H8O4	2,5-Dihydroxyphenylacetate/ 2,5-Dihydroxyphenylacetic acid/ Homogentisic acid	C00544
his-L	L-Histidine	C6H9N3O2	0	71-00-1	C6H9N3O2	His/ Glyoxaline-5-alanine/ (S)-alpha-Amino-1H-imidazole-4-propionic acid	C00135
hisp	L-Histidinol phosphate	C6H11N3O4P	-1	25679-93-0	C6H12N3O4P		C01100
histd	L-Histidinol	C6H12N3O	1	None	C6H11N3O		C00860
histrna	L-Histidyl-tRNA(His)	C6H9N3O2X	1		C6H8N3O2X		C02988
hmbil	Hydroxymethylbilane	C40H38N4O17	-8	73023-76-4	C40H46N4O17		C01024
hmpme	13(1)-Hydroxy-magnesium-protoporphyrin IX 13-monomethyl ester	C35H33MgN4O5	1		C35H34MgN4O5		C11829
hom-L	L-Homoserine	C4H9NO3	0	672-15-1	C4H9NO3	2-Amino-4-hydroxybutyric acid	C00263
hpyr	Hydroxypyruvate	C3H3O4	-1	1113-60-6	C3H4O4	Hydroxypyruvic acid/ 3-Hydroxypyruvate/ 3-Hydroxypyruvic acid	C00168
hxan	Hypoxanthine	C5H4N4O	0	68-94-0	C5H4N4O	1,7-Dihydro-6H-purin-6-one/ 6-Hydroxypurine/ Purine-6-ol	C00262
iasp	Iminoaspartate	C4H3NO4	-2		C4H5NO4		C05840
ichor	Isochorismate	C10H8O6	-2		C10H10O6	Isochorismic acid	C00885
icit	Isocitrate	C6H5O7	-3	30810-51-6	C6H8O7	1-Hydroxypropane-1,2,3-tricarboxylic acid/ Isocitric acid/ 1-Hydroxytricarballylic acid	C00311
ile-L	L-Isoleucine	C6H13NO2	0	73-32-5	C6H13NO2	2-Amino-3-methylvaleric acid/ Ile	C00407
iletrna	L-Isoleucyl-tRNA(Ile)	C6H13NO2X	1		C6H12NO2X		C03127
imacp	3-(Imidazol-4-yl)-2-oxopropyl phosphate	C6H8N2O5P	-1		C6H9N2O5P	Imidazole-acetol phosphate	C01267
imp	IMP	C10H11N4O8P	-2	131-99-7	C10H13N4O8P	Inosinic acid/ Inosine monophosphate/ Inosine 5'-monophosphate/ Inosine 5'-phosphate/ 5'-Inosinate/ 5'-Inosinic acid/ 5'-Inosine monophosphate	C00130
ins	Inosine	C10H12N4O5	0	58-63-9		Hypoxanthine ribonucleoside	C00294
ipdp	Isopentenyl diphosphate	C5H9O7P2	-3		C5H12O7P2	delta3-Isopentenyl diphosphate/ delta3-methyl-3-butenyl diphosphate/ Isopentenyl pyrophosphate	C00129
k	K+	K	1		K	Potassium/ K+	C00238
lac-D	D-Lactate	C3H5O3	-1	10326-41-7	C3H6O3	(R)-Lactate/ D-Lactic acid/ D-2-Hydroxypropanoic acid/ D-2-Hydroxypropionic acid	C00256
lac-L	L-Lactate	C3H5O3	-1	79-33-4	C3H6O3	(S)-Lactate/ L-Lactic acid/ Hydroxypropionic acid	C00186
leu-L	L-Leucine	C6H13NO2	0	61-90-5	C6H13NO2	2-amino-4-methylvaleric acid/ Leu	C00123
leutrna	L-Leucyl-tRNA(Leu)	C6H13NO2X	1		C6H12NO2X	L-Leucyl-tRNA	C02047
lgt-S	(R)-S-Lactoylglutathione	C13H20N3O8S	-1	59-85-8	C13H21N3O8S		C03451
linlnacp	ocatadecatrienoyl_ACP (n-C18:3_ACP)	C18H29OX	0		C18H29OX
lipid_CN	lipid of Cyanothece 51142	C2137H3838O542P8S5	-10
lipidAds	Lipid A Disaccharide	C68H127N2O20P	-2		C68H129N2O20P	2,3,2',3'-Tetrakis(3-hydroxytetradecanoyl)-D-glucosaminyl-1,6-beta-D-glucosamine 1-phosphate/ 2,3-Bis(3-hydroxytetradecanoyl)-D-glucosaminyl-1,6-beta-D-2,3-bis(3-hydroxytetradecanoyl)-beta-D-glucosaminyl 1-phosphate/ 2,3-Bis-(beta-hydroxymyristoyl)-D-gluc	C04932
lipidX	2,3-Bis(3-hydroxytetradecanoyl)-beta-D-glucosaminyl 1-phosphate	C34H64NO12P	-2	None	C34H66NO12P	2,3-Bis(beta-hydoroxymyristoyl)-beta-D-glucosaminyl 1-phosphate/ Lipid X	C04824
lyc	Lycopene	C40H56	0	502-65-8	C40H56	Lycopene	C05432
lys-L	L-Lysine	C6H15N2O2	1	56-87-1	C6H14N2O2	Lysine acid/ Lys/ 2,6-diaminohexanoic acid	C00047
lystrna	L-Lysine-tRNA (Lys)	C6H15N2O2X	2		C6H13N2O2X	L-Lysyl-tRNA	C01931
malacp	Malonyl-[acyl-carrier protein]	C3H2O3X	-1		C3H3O3X		C01209
malcoa	Malonyl-CoA	C24H33N7O19P3S	-5	524-14-1	C24H38N7O19P3S	Malonyl coenzyme A	C00083
mal-L	L-Malate	C4H4O5	-2	97-67-6	C4H6O5	(S)-Malate/ L-Apple acid/ L-Malic acid/ L-2-Hydroxybutanedioic acid/ Malate	C00149
man1p	D-Mannose 1-phosphate	C6H11O9P	-2		C6H13O9P	alpha-D-Mannose 1-phosphate	C03812
man6p	D-Mannose 6-phosphate	C6H11O9P	-2	None	C6H13O9P		C00275
met-D	D-Methionine	C5H11NO2S	0	348-67-4	C5H11NO2S	D-2-Amino-4-(methylthio)butyric acid/ D-2-Amino-4-(methylthio)butyrate	C00855
methf	5,10-Methenyltetrahydrofolate	C20H20N7O6	-1		C20H22N7O6	(6R)-5,10-methenyltetrahydrofolate/ 5,10-methenyltetrahydrofolate/ N5,N10-methenyl-5,6,7,8-tetrahydrofolate/ N5,N10-methenyl-tetrahydrofolate	C00445
met-L	L-Methionine	C5H11NO2S	0	63-68-3	C5H11NO2S	Met/ L-2-Amino-4methylthiobutyric acid	C00073
mettrna	L-Methionyl-tRNA (Met)	C5H11NO2SX	1		C5H10NO2SX	L-Methionyl-tRNA	C02430
mg2	Mg	Mg	2		Mg	Magnesium/ Mg2+	C00305
mgppp9	Magnesium protoporphyrin	C34H30MgN4O4	0	15985-39-4	C34H32MgN4O4	Mg-protoporphyrin IX/ Magnesium protoporphyrin IX	C03516
mgpppmme	Magnesium protoporphyrin monomethyl ester	C35H33MgN4O4	1	652-69-7	C35H34MgN4O4	Magnesium-protoporphyrin IX 13-monomethyl ester/ Mg-Protoporphyrin IX 13-monomethyl ester/ Magnesium protoporphyrin IX 13-methyl ester	C04536
mlthf	5,10-Methylenetetrahydrofolate	C20H21N7O6	-2		C20H23N7O6	N5,N10-methylene-tetrahydrofolate/ N5,N10-methylene-5,6,7,8-tetrahydrofolate/ 5,10-methylene-5,6,7,8-tetrahydrofolate	C00143
mn2	Mn2+	Mn	2	None	Mn	Manganese dication/ Manganese/ Mn(II)	C00034
mobd	Molybdate	MoO4	-2	14259-85-9	H2MoO4		C06232
msbq	2-methyl-6-solanyl-1,4-benzoquinone	C52H80O2	0		C52H80O2
mthgxl	Methylglyoxal	C3H4O2	0	78-98-8	C3H4O2	Pyruvaldehyde/ Pyruvic aldehyde/ 2-Ketopropionaldehyde/ 2-Oxopropanal	C00546
mvpc	monovinyl protochlorophyllide a	C35H31N4O5Mg	1		C35H32N4O5Mg
myrsacp	Myristoyl-ACP (n-C14:0ACP)	C14H27OX	0		C14H27OX
n2	N2	N2	0	7727-37-9	N2	Nitrogen	C00697
na1	Sodium	Na	1	7440-23-5	Na	Natrium/ Na	C01330
nac	Nicotinate	C6H4NO2	-1	59-67-6	C6H5NO2	Niacin/ Nicotinic acid/ 3-Pyridinecarboxylic acid	C00253
nad	Nicotinamide adenine dinucleotide	C21H26N7O14P2	-1	53-84-9	C21H28N7O14P2	NAD+/ NAD/ beta-Diphosphopyridine Nucleotide/ beta-NAD/ beta-Nicotinamide adenine dinucleotide	C00003
nadh	Nicotinamide adenine dinucleotide - reduced	C21H27N7O14P2	-2	53-84-9	C21H29N7O14P2	DPNH/ NADH	C00004
nadp	Nicotinamide adenine dinucleotide phosphate	C21H25N7O17P3	-3	53-59-8	C21H29N7O17P3	NADP/ beta-Nicotinamide adenine dinucleotide phosphate/ NADP+	C00006
nadph	Nicotinamide adenine dinucleotide phosphate - reduced	C21H26N7O17P3	-4	2646-71-1	C21H30N7O17P3	TPNH/ beta-triphosphopyridine nucleotide/ NADPH	C00005
ncam	Nicotinamide	C6H6N2O	0	98-92-0	C6H6N2O	Nicotinic acid amide/ Niacinamide/ Vitamin PP	C00153
Ncarbsar	N-Carbamoylsarcosine	C4H7N2O3	-1		C4H8N2O3		C01043
nh4	Ammonium	H4N	1		H3N		C01342
ni2	Ni2+	Ni	2		Ni	Nickel	C00291
nicrnt	Nicotinate D-ribonucleotide	C11H12NO9P	-2		C11H15NO9P	Nicotinate ribonucleotide/ Nicotinic acid ribonucleotide/ beta-Nicotinate D-ribonucleotide	C01185
Nmimzd24d	N-Methylhydantoin	C4H6N2O2	0	616-04-6	C4H6N2O2		C02565
nmn	NMN	C11H14N2O8P	-1	1094-61-7		Nicotinamide D-ribonucleotide/ Nicotinamide mononucleotide/ Nicotinamide ribonucleotide	C00455
no	Nitric oxide	NO	0	10102-43-9		Nitrogen monoxide/ NO/ nitroxyl anion	C00533
no2	Nitrite	NO2	-1	7697-37-2	HNO2	Nitric acid	C00088
no3	Nitrate	NO3	-1		HNO3	Nitric acid	C00244
nondp	all-trans-Nonaprenyl diphosphate	C45H73O7P2	-3		C45H76O7P2		C04145
nspr	Neurosporene	C40H58	0	1253-84-5	C40H58		C05431
o2	O2	O2	0	7782-44-7	O2	Oxygen/ dioxygen	C00007
o2-	Superoxide	O2	-1		O2	O2 free radical/ anion/ O2.-	C00704
oaa	Oxaloacetate	C4H2O5	-2	328-42-7	C4H4O5	Oxalacetic acid/ Oxaloacetic acid/ 2-oxobutanedioic acid/ Oxosuccinic acid	C00036
ocdacp	Octadecanoyl-ACP (n-C18:0ACP)	C18H35OX	0		C18H35OX	Octadecanoyl-[acyl-carrier protein]
ocdcyaacp	Octadecynoyl-ACP (n-C18:2ACP)	C18H31OX	0		C18H31OX	Octadecdienoyl-ACP (n-C18:2ACP)
octacp	Octanoyl-[acyl-carrier protein]	C8H15OX	0	2148941	C8H15OX	Octanoyl-[acp]/ Octanoyl-[acyl-carrier protein]/ Octanoyl-ACP (n-C8:0ACP)	C05752
octeacp	Octadecenoyl-ACP (n-C18:1ACP)	C18H33OX	0		C18H33OX		C01203
ohpb	2-Oxo-3-hydroxy-4-phosphobutanoate	C4H4O8P	-3				C06054
ompme	13(1)-Oxo-magnesium-protoporphyrin IX 13-monomethyl ester	C35H31MgN4O5	1		C35H32MgN4O5		C11830
orn-L	L-Ornithine	C5H13N2O2	1	70-26-8	C5H12N2O2	2,5-Diaminovaleric acid/ 2,5-Diaminopentanoic acid/ 2,5-Diaminopentanoate	C00077
orot	Orotate	C5H3N2O4	-1	65-86-1	C5H4N2O4	Orotic acid/ Uracil-6-carboxylic acid	C00295
orot5p	Orotidine 5'-phosphate	C10H10N2O11P	-3	2149-82-8	C10H13N2O11P	Orotidylic acid	C01103
pa_CN	phosphatidate (Cyanothece)	C1824H3264O400P50	-100
palmacp	Palmitoyl-ACP (n-C16:0ACP)	C16H31OX	0		C16H31OX
pan4p	Pantetheine 4'-phosphate	C11H21N2O7PS	-2		C11H23N2O7PS	Phosphopantetheine/ 4'-Phosphopantetheine	C01134
pant-R	(R)-Pantoate	C6H11O4	-1	470-29-1	C6H12O4	Pantoate/ Pantoic acid/ D-pantoate	C00522
pap	Adenosine 3',5'-bisphosphate	C10H11N5O10P2	-4	1053-73-2	C10H15N5O10P2	PAP/ 3'-Phosphoadenylate/ Phosphoadenosine phosphate	C00054
paps	3'-Phosphoadenylyl sulfate	C10H11N5O13P2S	-4	482-67-7	C10H15N5O13P2S	3'-Phospho-5'-adenylyl sulfate/ PAPS/ 3'-Phosphoadenosine 5'-phosphosulfate	C00053
PC_ox	Plastocyanin (oxidized form)	CuX	2		CuX
PC_rd	Plastocyanin (reduced form)	CuX	1		CuX
pdx5p	Pyridoxine 5'-phosphate	C8H10NO6P	-2	447-05-2	C8H12NO6P	Pyridoxine phosphate/ Pyridoxine 5-phosphate	C00627
pep	Phosphoenolpyruvate	C3H2O6P	-3	138-08-9	C3H5O6P	Phosphoenolpyruvic acid/ PEP	C00074
pgly_CN	Phosphotidylglycerol (Cyanothece)	C1974H3614O500P50	-50
pglyp_CN	Phosphatidylglycerolphosphate (Cyanothece)	C1974H3564O650P100	-150
phdp	Phytyl diphosphate	C20H39O7P2	-3		C20H42O7P2		C05427
phe-L	L-Phenylalanine	C9H11NO2	0	63-91-2	C9H11NO2	(S)-Phenylalanine/ 3-phenylalanine/ (S)-alpha-amino-beta-phenylpropionic acid	C00079
pheme	Protoheme	C34H31FeN4O4	-1	14875-96-8	C34H32FeN4O4	Haem/ Heme B/ Heme	C00032
phetrna	L-Phenylalanyl-tRNA(Phe)	C9H11NO2X	1		C9H10NO2X		C03511
phom	O-Phospho-L-homoserine	C4H8NO6P	-2		C4H10NO6P		C01102
phpyr	Phenylpyruvate	C9H7O3	-1	156-06-9	C9H8O3	Phenylpyruvic acid/ alpha-Ketohydrocinnamic acid/ keto-Phenylpyruvate/ 3-Phenyl-2-oxopropanoate	C00166
phq	Phylloquinone	C31H46O2	0		C31H46O2	Phytonadione;/ 2-Methyl-3-phytyl-1,4-naphthoquinone/ Vitamin K1;	C02059
phthr	O-Phospho-4-hydroxy-L-threonine	C4H8NO7P	-2	598-35-6	C4H10NO7P	O-Phospho-4-hydroxy-L-threonine	C06055
pi	Phosphate	HO4P	-2	14265-44-2	H3O4P	Orthophosphate/ Pi/ Phosphoric acid	C00009
pmcoa	Pimeloyl-CoA	C28H41N7O19P3S	-5		C28H46N7O19P3S	6-Carboxyhexanoyl-CoA	C01063
pnto-R	(R)-Pantothenate	C9H16NO5	-1	79-83-4	C9H17NO5	D-Pantothenate/ Pantothenate/ Pantothenic acid	C00864
ppa	Propionate	C3H5O2	-1	79-09-4	C3H6O2	Propanoate/ Propanoic acid/ Propionic acid	C00163
ppap	Propanoyl phosphate	C3H5O5P	-2	121-69-7	C3H7O5P		C02876
ppbng	Porphobilinogen	C10H13N2O4	-1	487-90-1	C10H14N2O4		C00931
ppcoa	Propanoyl-CoA	C24H36N7O17P3S	-4	317-66-8	C24H40N7O17P3S	Propionyl coenzyme A/ Propionyl-CoA	C00100
pphn	Prephenate	C10H8O6	-2	126-49-8	C10H10O6	Prephenic acid	C00254
ppi	Diphosphate	HO7P2	-3	206975	H4O7P2	PPi/ Pyrophosphate/ Pyrophosphoric acid	C00013
ppp9	Protoporphyrin	C34H32N4O4	-2	553-12-8	C34H34N4O4	Protoporphyrin IX/ Porphyrinogen IX	C02191
pppg9	Protoporphyrinogen IX	C34H38N4O4	-2		C34H40N4O4		C01079
pppi	Inorganic triphosphate	HO10P3	-4		H5O10P3	triphosphate	C03279
pptdp	Prephytoene diphosphate	C40H65O7P2	-3	112-62-9	C40H68O7P2		C03427
pq9	Plastoquinone-9	C53H80O2	0	4299-57-4	C53H80O2
pq9h2	Plastoquinol-9	C53H82O2	0		C53H82O2
pram	5-Phospho-beta-D-ribosylamine	C5H11NO7P	-1		C5H12NO7P	5-Phosphoribosylamine/ 5-Phospho-D-ribosylamine/ 5-Phosphoribosyl-1-amine	C03090
pran	N-(5-Phospho-D-ribosyl)anthranilate	C12H13NO9P	-3	None	C12H16NO9P	N-(5-Phospho-beta-D-ribosyl)anthranilate/ N-(5-Phosphoribosyl)anthranilic acid	C04302
prbamp	1-(5-Phosphoribosyl)-AMP	C15H19N5O14P2	-4		C15H23N5O14P2	Phosphoribosyl)-AMP	C02741
prbatp	1-(5-Phosphoribosyl)-ATP	C15H19N5O20P4	-6		C15H25N5O20P4	Phosphoribosyl-ATP/ N1-(5-Phospho-D-ribosyl)-ATP	C02739
pre3a	Precorrin 3 A	C43H43N4O16	-7		C43H50N4O16		C05772
pre3b	Precorrin 3B	C43H44N4O17	-6		C43H50N4O17		C06406
pre4	Precorrin 4	C44H44N4O17	-8		C44H52N4O17		C06407
pre5	Precorrin 5	C45H46N4O17	-8		C45H54N4O17		C06416
pre6a	Precorrin 6A	C44H47N4O16	-7		C44H54N4O16	Precorrin 6X	C06320
pre6b	Precorrin 6B	C44H49N4O16	-7		C44H56N4O16	Precorrin 6Y	C06319
pre8	Precorrin 8	C45H53N4O14	-7		C45H60N4O14	Precorrin 8X	C06408
prfp	1-(5-Phosphoribosyl)-5-[(5-phosphoribosylamino)methylideneamino]imidazole-4-carboxamide	C15H22N5O15P2	-3		C15H25N5O15P2	Phosphoribosyl-formimino-AICAR-phosphate/ N-(5'-Phospho-D-ribosylformimino)-5-amino-1-(5''-phospho-D-ribosyl)-4-imidazolecarboxamide/ 5-(5-Phospho-D-ribosylaminoformimino)-1-(5-phosphoribosyl)-imidazole-4-carboxamide/ 5-[(5-Phospho-1-deoxyribulos-1-ylamin	C04896
prlp	5-[(5-phospho-1-deoxyribulos-1-ylamino)methylideneamino]-1-(5-phosphoribosyl)imidazole-4-carboxamide	C15H22N5O15P2	-3		C15H25N5O15P2	Phosphoribulosyl-formimino-AICAR-phosphate/ N-(5'-Phosphoribulosylformimino)-5-amino-1-(5''-phosphoribosyl)-4-imidazolecarboxamide/ N-(5'-Phospho-D-1'-ribulosylformimino)-5-amino-1-(5''-phospho-D-ribosyl)-4-imidazolecarboxamide	C04916
pro-L	L-Proline	C5H9NO2	0	147-85-3	C5H9NO2	2-Pyrrolidinecarboxylic acid/ Pro	C00148
protein_CN	Average protein of Cyanothece 51142	C50611H79595N13434O14897S302	-157
protrna	L-Prolyl-tRNA(Pro)	C5H9NO2X	1		C5H8NO2X		C02702
prpp	5-Phospho-alpha-D-ribose 1-diphosphate	C5H8O14P3	-5		C5H13O14P3	5-Phosphoribosyl diphosphate/ PRPP/ 5-Phosphoribosyl 1-pyrophosphate	C00119
psd5p	Pseudouridine 5'-phosphate	C9H11N2O9P	-2	1157-60-4	C9H13N2O9P		C01168
pser-L	O-Phospho-L-serine	C3H6NO6P	-2	407-41-0	C3H8NO6P		C01005
ptn	Phytoene	C40H64	0	583-08-4	C40H64		C05413
pyam5p	Pyridoxamine 5'-phosphate	C8H11N2O5P	-2	529-96-4	C8H13N2O5P	Pyridoxamine phosphate/ Pyridoxamine 5-phosphate	C00647
pydx5p	Pyridoxal 5'-phosphate	C8H7NO6P	-3	54-47-7	C8H10NO6P	Pyridoxal phosphate/ Pyridoxal 5-phosphate	C00018
pyf	Phytofluene	C40H62	0	583-08-4	C40H62		C05414
pyr	Pyruvate	C3H3O3	-1	127-17-3	C3H4O3	Pyruvic acid/ 2-Oxopropanoate/ 2-Oxopropanoic acid/ Pyroracemic acid/ alpha-Ketopropionic acid/ 2-Ketopropionic Acid	C00022
quln	Quinolinate	C7H3NO4	-2	89-00-9	C7H5NO4	Quinolinic acid/ 2,3-Pyridinedicarboxylic acid/ Pyridine-2,3-dicarboxylate	C03722
r1p	alpha-D-Ribose 1-phosphate	C5H9O8P	-2	58459-37-3	C5H11O8P	Ribose 1-phosphate/ D-Ribose 1-phosphate	C00442
r5p	alpha-D-Ribose 5-phosphate	C5H9O8P	-2	4300-28-1	C5H11O8P	D-Ribose 5-phosphate/ Ribose 5-phosphate	C00117
rb15bp	D-Ribulose 1,5-bisphosphate	C5H8O11P2	-4	24218-00-6	C5H12O11P2		C01182
rdmbzi	N1-(alpha-D-ribosyl)-5,6-dimethylbenzimidazole	C14H18N2O4	0		C14H18N2O4	alpha-Ribazole	C05775
rib-D	D-Ribose	C5H10O5	0	50-69-1	C5H10O5		C00121
ribflv	Riboflavin	C17H20N4O6	0	83-88-5	C17H20N4O6	7,8-Dimethyl-10-ribitylisoalloxazine/ Lactoflavin/ Vitamin B2	C00255
rna_CN	RNA, Cyanothece 51142	C950H1069N369O700P100	-100		C950H1069N369O700P100
rnam	N-Ribosylnicotinamide	C11H15N2O5	1		C11H15N2O5		C03150
ru5p-D	D-Ribulose 5-phosphate	C5H9O8P	-2	4151-19-3	C5H11O8P		C00199
s17bp	Sedoheptulose 1,7-bisphosphate	C7H12O13P2	-4		C7H16O13P2	altro-Heptulose 1,7-biphosphate	C00447
s7p	Sedoheptulose 7-phosphate	C7H13O10P	-2	None	C7H15O10P	altro-Heptulose 7-phosphate	C00281
sbzcoa	O-Succinylbenzoyl-CoA	C32H39N7O20P3S	-5		C32H44N7O20P3S	2-Succinylbenzoyl-CoA/ Succinylbenzoyl-CoA	C03160
ser-L	L-Serine	C3H7NO3	0	56-45-1	C3H7NO3	Ser/ L-2-Amino-3-hydroxypropionic acid/ L-3-Hydroxy-alanine	C00065
sertrna	L-Seryl-tRNA(Ser)	C3H7NO3X	1		C3H6NO3X		C02553
shcl	Dihydrosirohydrochlorin	C42H40N4O16	-8	65207-12-7	C42H48N4O16		C02463
skm	Shikimate	C7H9O5	-1	138-59-0	C7H10O5	Shikimic acid/ 3,4,5-Trihydroxy-1-cyclohexenecarboxylic acid	C00493
skm5p	Shikimate 5-phosphate	C7H8O8P	-3		C7H11O8P	Shikimate 3-phosphate	C03175
so3	Sulfite	O3S	-2	7782-99-2	H2O3S	Sulfurous acid	C00094
so4	Sulfate	O4S	-2	7664-93-9	H2O4S	Sulfuric acid	C00059
sqdg_CN	Sulfoquinovosyldiacylglycerol (Cyanothece)	C2124H3764O600S50	-50
sql	Squalene	C30H50	0	111-02-4		Supraene/ Spinacene	C00751
sucbz	o-Succinylbenzoate	C11H8O5	-2		C11H10O5	2-Succinylbenzoate/ Succinylbenzoate	C02730
succ	Succinate	C4H4O4	-2	110-15-6	C4H6O4	Succinic acid/ Butanedionic acid/ Ethylenesuccinic acid	C00042
succoa	Succinyl-CoA	C25H35N7O19P3S	-5	604-98-8	C25H40N7O19P3S	succino-1-yl-coenzymeA/ Succinyl coenzyme A	C00091
sucephcc	2-Succinyl-5-enolpyruvyl-6-hydroxy-3-cyclohexene-1-carboxylate	C14H13O9	-3		C14H16O9		C16519
sucsal	Succinic semialdehyde	C4H5O3	-1	692-29-5	C4H6O3	4-Oxobutanoate/ Succinate semialdehyde	C00232
tcggrpp	trans,trans,cis-Geranylgeranyl pyrophosphate	C20H33O7P2	-3		C20H36O7P2	trans,trans,cis-Geranylgeranyl diphosphate	C11356
tdeacp	Tetradecenoyl-ACP (n-C14:1ACP)	C14H25OX	0		C14H25OX
thdp	2,3,4,5-Tetrahydrodipicolinate	C7H7NO4	-2	52-52-8	C7H9NO4	(R)-2,3,4,5-tetrahydropyridine-2,6-dicarboxylate/ delta1-Piperidine-2,6-dicarboxylate	C03972
thf	5,6,7,8-Tetrahydrofolate	C19H21N7O6	-2	135-16-0	C19H23N7O6	(6S)-Tetrahydrofolic acid/ (6S)-THFA/ Tetrahydrofolate/ Tetrahydrofolic acid/ THF/ (6S)-Tetrahydrofolate	C00101
thglu	Tetrahydropteroyltri-L-glutamate	C24H32N8O12	-2		C24H34N8O12		C04144
thmmp	Thiamin monophosphate	C12H16N4O4PS	-1	532-40-1	C12H18N4O4PS	Thiamin phosphate/ Thiamine phosphate/ TMP/ Thiamine monophosphate	C01081
thmpp	Thiamine diphosphate	C12H16N4O7P2S	-2	154-87-0	C12H19N4O7P2S	Thiamin diphosphate/ ThPP/ TPP	C00068
thr-L	L-Threonine	C4H9NO3	0	72-19-5	C4H9NO3	Thr/ 2-Amino-3-hydroxybutyric acid	C00188
thrp	L-Threonine O-3-phosphate	C4H8NO6P	-2		C4H10NO6P	L-Threonine phosphate	C12147
thrtrna	L-Threonyl-tRNA(Thr)	C4H9NO3X	1		C4H8NO3X		C02992
thym	Thymine	C5H6N2O2	0	65-71-4		T/ 2,4-Dihydroxy-5-methylpyrimidine/ Thy	C00178
thymd	Thymidine	C10H14N2O5	0	50-89-5	C10H14N2O5	dT/ 2'-Deoxythymidine/ Deoxythymidine	C00214
trdox	Oxidized thioredoxin	X	0		X		C00343
trdrd	Reduced thioredoxin	XH2	0		XH2		C00342
tre6p	alpha,alpha'-Trehalose 6-phosphate	C12H21O14P	-2	4484-88-2	C12H23O14P	Trehalose 6-phosphate	C00689
trnaala	tRNA(Ala)	HOX	0		HOX		C01635
trnaarg	tRNA(Arg)	HOX	0		HOX		C01636
trnaasn	tRNA(Asn)	HOX	0		HOX		C01637
trnaasp	tRNA(Asp)	HOX	0		HOX		C01638
trnacys	tRNA(Cys)	HOX	0		HOX		C01639
trnaglu	tRNA (Glu)	HOX	0	None	HOX		C01641
trnagly	tRNA(Gly)	HOX	0		HOX		C01642
trnahis	tRNA(His)	HOX	0		HOX		C01643
trnaile	tRNA(Ile)	HOX	0		HOX		C01644
trnaleu	tRNA(Leu)	HOX	0		HOX		C01645
trnalys	tRNA(Lys)	HOX	0		HOX		C01646
trnamet	tRNA(Met)	HOX	0		HOX		C01647
trnaphe	tRNA(Phe)	HOX	0		HOX		C01648
trnapro	tRNA(Pro)	HOX	0		HOX		C01649
trnaser	tRNA(Ser)	HOX	0		HOX		C01650
trnathr	tRNA(Thr)	HOX	0		HOX		C01651
trnatrp	tRNA(Trp)	HOX	0		HOX		C01652
trnatyr	tRNA(Tyr)	HOX	0		HOX		C00787
trnaval	tRNA(Val)	HOX	0		HOX		C01653
trp-L	L-Tryptophan	C11H12N2O2	0	73-22-3	C11H12N2O2	(S)-alpha-amino-beta-(3-indolyl)-propionic acid	C00078
trptrna	L-Tryptophanyl-tRNA(Trp)	C11H12N2O2X	1		C11H11N2O2X		C03512
tyr-L	L-Tyrosine	C9H11NO3	0	60-18-4	C9H11NO3	(S)-3-(p-Hydroxyphenyl)alanine/ (S)-2-Amino-3-(p-hydroxyphenyl)propionic acid	C00082
tyrtrna	L-Tyrosyl-tRNA(Tyr)	C9H11NO3X	1		C9H10NO3X		C02839
u23ga	UDP-2,3-bis(3-hydroxytetradecanoyl)glucosamine	C43H75N3O20P2	-2		C43H77N3O20P2	UDP-2,3-bis(beta-hydroxymyristoyl)-D-glucosamine/ UDP-2,3-bis(3-hydroxytetradecanoyl)-D-glucosamine	C04652
u3aga	UDP-3-O-(3-hydroxytetradecanoyl)-N-acetylglucosamine	C31H51N3O19P2	-2		C31H53N3O19P2	UDP-3-O-(beta-hydroxymyristoyl)-N-acetylglucosamine	C04738
u3hga	UDP-3-O-(3-hydroxytetradecanoyl)-D-glucosamine	C29H50N3O18P2	-1		C29H51N3O18P2	UDP-3-O-(beta-hydroxymyristoyl)-D-glucosamine	C06022
uaagmda	Undecaprenyl-diphospho-N-acetylmuramoyl-(N-acetylglucosamine)-L-alanyl-D-glutamyl-meso-2,6-diaminopimeloyl-D-alanyl-D-alanine	C95H152N8O28P2	-4		C95H156N8O28P2		C05898
uaccg	UDP-N-acetyl-3-O-(1-carboxyvinyl)-D-glucosamine	C20H26N3O19P2	-3		C20H29N3O19P2	UDP-N-acetyl-3-(1-carboxyvinyl)-D-glucosamine/ UDP-N-acetylglucosamine-3-O-pyruvateether	C04631
uacgam	UDP-N-acetyl-D-glucosamine	C17H25N3O17P2	-2		C17H27N3O17P2	UDP-N-acetylglucosamine	C00043
uacmam	UDP-N-acetyl-D-mannosamine	C17H25N3O17P2	-2		C17H27N3O17P2		C01170
uagmda	Undecaprenyl-diphospho-N-acetylmuramoyl-L-alanyl-D-glutamyl-meso-2,6-diaminopimeloyl-D-alanyl-D-alanine	C87H139N7O23P2	-4		C87H143N7O23P2		C05897
uama	UDP-N-acetylmuramoyl-L-alanine	C23H33N4O20P2	-3		C23H36N4O20P2		C01212
uamag	UDP-N-acetylmuramoyl-L-alanyl-D-glutamate	C28H39N5O23P2	-4		C28H43N5O23P2		C00692
uamr	UDP-N-acetylmuramate	C20H28N3O19P2	-3		C20H31N3O19P2		C01050
udcpdp	Undecaprenyl diphosphate	C55H89O7P2	-3		C55H92O7P2	all-trans-Undecaprenyl diphosphate	C03543
udcpp	Undecaprenyl phosphate	C55H89O4P	-2		C55H91O4P		C00348
udp	UDP	C9H11N2O12P2	-3	58-98-0	C9H14N2O12P2	Uridine 5'-diphosphate/ uridine diphosphate/ 5'-uridylate diphosphate	C00015
udpg	UDPglucose	C15H22N2O17P2	-2		C15H24N2O17P2	UDP-D-glucose	C00029
udpgal	UDPgalactose	C15H22N2O17P2	-2		C15H24N2O17P2	UDP-D-galactose/ UDP-D-galactopyranose	C00052
udpglcur	UDP-D-glucuronate	C15H19N2O18P2	-3		C15H22N2O18P2	UDPglucuronate	C00167
udpsq	UDP-6-sulfoquinovose	C15H21N2O19P2S	-3		C15H24N2O19P2S		C11521
ugmd	UDP-N-acetylmuramoyl-L-alanyl-D-gamma-glutamyl-meso-2,6-diaminopimelate	C35H51N7O26P2	-4		C35H55N7O26P2	UDP-N-acetylmuramoyl-L-alanyl-D-gamma-glutamyl-meso-2,6-/ UDP-N-acetylmuramoyl-L-alanyl-D-gamma-glutamyl-meso-2,6-diaminoheptanedioate	C04877
ugmda	UDP-N-acetylmuramoyl-L-alanyl-D-glutamyl-meso-2,6-diaminopimeloyl-D-alanyl-D-alanine	C41H61N9O28P2	-4		C41H65N9O28P2	UDP-N-acetylmuramoyl-L-alanyl-D-glutamyl-6-carboxy-L-lysyl-D-alanyl-D-alanine	C04882
ump	UMP	C9H11N2O9P	-2	58-97-9	C9H13N2O9P	Uridylic acid/ Uridine monophosphate/ Uridine 5'-monophosphate/ 5'Uridylic acid	C00105
uppg3	Uroporphyrinogen III	C40H36N4O16	-8	1976-85-8	C40H44N4O16		C01051
ura	Uracil	C4H4N2O2	0	66-22-8	C4H4N2O2	2,4-dioxy pyrimidine/ 2,4-Dihydroxypyrimidine/ U/ 2,4(1H,3H)-Pyrimidinedione	C00106
urate	Urate	C5H4N4O3	0	69-93-2	C5H4N4O3	2,6,8-trioxypurine/ Uric oxide/ Lithic acid/ 8-Hydroxyxanthine/ Uric acid	C00366
uri	Uridine	C9H12N2O6	0	58-96-8			C00299
utp	UTP	C9H11N2O15P3	-4	63-39-8	C9H15N2O15P3	rUTP/ 5'-uridylate triphosphate/ Uridine 5'-triphosphate/ Uridine triphosphate	C00075
val-L	L-Valine	C5H11NO2	0	72-18-4	C5H11NO2	2-Aminoisovaleric acid/ Val/ 2-Amino-3-methylbutyric acid	C00183
valtrna	L-Valyl-tRNA(Val)	C5H11NO2X	1		C5H10NO2X		C02554
wo4	tungstate	WO4	-2		H2WO4
xan	Xanthine	C5H4N4O2	0	69-89-6		2,6-Dioxopurine	C00385
xmp	Xanthosine 5'-phosphate	C10H11N4O9P	-2	523-98-8	C10H13N4O9P	Xanthylic acid/ (9-D-Ribosylxanthine)-5'-phosphate/ XMP	C00655
xtsn	Xanthosine	C10H12N4O6	0	146-80-5			C01762
xu5p-D	D-Xylulose 5-phosphate	C5H9O8P	-2	None	C5H11O8P		C00231
zcar	zeta-Carotene	C40H60	0	1253-84-5	C40H60		C05430
zn2	Zinc	Zn	2	7440-66-6	Zn	Zn2+/ Zn(II)	C00038
cyanophycin	Cyanophycin dimer	C20H38N10O9	2		C20H46N10O12
arg-L-asp-L-asp-L	Cyanophycin monomer with aspartate	C14H25N6O8	1		C14H30N6O10
co2dam_1	Cob(II)yrinate a,c diamide	C45H56CoN6O12	-4	7625-23-2	C45H61CoN6O12		C06504
fdxo-2-2	ferredoxin (oxidixed form, [2Fe-2S] type	Fe2S2X	2		Fe2S2X
fdxr-2-2	ferredoxin (reduced form, [2Fe-2S] type)	Fe2S2X	1		Fe2S2X
formate	Formate	CH1O2	-1	64-18-6	CH2O2	Methanoic acid/ Formic acid/ Hydrogencarboxylic acid/ aminic acid	C00058
mgdg_CN	Monogalactosyldiacylglycerol (Cyanothece)	C2124H3814O500	0		C2124H3814O500
photon_PSI	Photosystem I photon	X	0		X
photon_PSII	Photosystem II photon	X	0		X
trnagln	tRNA(Gln)	HOX	0		HOX		C01640
glutrna_gln	L-Glutamyl-tRNA(Gln)	C5H8NO4X	0		C5H8NO4X	Glu-tRNA(Gln)
asptrna_asn	L-Aspartyl-tRNA(Asn)	C4H6NO4X	0		C4H6NO4X	Asp-tRNA(Asn)
