# Supplementary material for: Genome-Scale Modeling of Light-Driven Reductant Partitioning and Carbon Fluxes in Diazotrophic Unicellular Cyanobacterium Cyanothece sp. ATCC 51142
Source: PLoS Comput Biol. 2012 Apr 5;8(4):e1002460. doi: 10.1371/journal.pcbi.1002460 (PMC3329150; doi:10.1371/journal.pcbi.1002460)
Supplement: Table S6 — Experimental measurements for two chemostat conditions. (XLSX) [file pcbi.1002460.s010.xlsx]

## Sheet: Table S6
Table S6. Experimental measurements* for two chemostat conditions
Chemostat conditions	Dilution rate (h-1)	Photon uptake flux at 630 nm (mmol.g-1 AFDW.h-1)	Photon uptake flux at 680 nm (mmol.g-1 AFDW.h-1)	O2 production rate (mmol.g-1 AFDW.h-1)	Biomass concentration (g DW.L-1)	Ash-free biomass concentration (g AFDW.L-1)
Light-limited	0.05	34.4	62.3	2.66	0.179	0.059
NH4-limited	0.05	29.8	48.5	2.86	0.181	0.079
Notes:
* Photon consumption and oxygen production rates were measured in µmol.L-1.min-1 and converted to mmol.g-1 AFDW.h-1 using the cell biomass concentration (g AFDW.L-1)
