# Supplementary material for: Genome-Scale Modeling of Light-Driven Reductant Partitioning and Carbon Fluxes in Diazotrophic Unicellular Cyanobacterium Cyanothece sp. ATCC 51142
Source: PLoS Comput Biol. 2012 Apr 5;8(4):e1002460. doi: 10.1371/journal.pcbi.1002460 (PMC3329150; doi:10.1371/journal.pcbi.1002460)
Supplement: Table S7 — Transcriptomic data. Fold change in mRNA expression levels between light-limited and ammonia-limited chemostats. (XLSX) [file pcbi.1002460.s011.xlsx]

## Sheet: Table S7
Table S7. Transcriptomic data
Locus	Protein description	Fold change (Light limitation / NH4 Limitation)	Change Log2 (Light limitation / NH4 Limitation)	Student's (1 tailed) t_test
cce_0001	hypothetical protein	2.72502	1.44627	5.61622e-10
cce_0003	hypothetical protein	1.21917	0.2859	1.53729e-05
cce_0004	cation efflux system membrane protein; czcA	1.28154	0.357881	5.14112e-05
cce_0006	hypothetical protein; contains a glycoside hydrolase, family 24 domain	0.35397	-1.4983	6.27667e-05
cce_0007	hypothetical protein	0.143722	-2.79864	9.82122e-10
cce_0008	hypothetical protein	0.159215	-2.65095	4.63103e-08
cce_0009	unknown	0.371284	-1.4294	7.00427e-10
cce_0011	probable fdxN element excision controlling factor protein; xisH1	0.649265	-0.62312	5.4063e-05
cce_0013	hypothetical protein	1.91355	0.936249	0.000574438
cce_0014	putative site-specific DNA-methyltransferase	0.825566	-0.276545	0.000125063
cce_0015	unknown; contains a Lambda repressor-like, DNA-binding domain	1.176	0.233886	0.0439623
cce_0017	hypothetical protein; contains a peptidase M50 domain	1.65774	0.729217	1.04867e-06
cce_0018	unknown; contains a beta-lactamase-like domain	0.858542	-0.220039	0.00546047
cce_0020	conserved hypothetical protein	0.648971	-0.623774	0.00462549
cce_0021	unknown; contains HesB/YadR/YfhF domains	0.777923	-0.3623	3.8102e-05
cce_0022	unknown; contains a TPR-like helical domain	1.44402	0.530093	4.11524e-05
cce_0023	hypothetical protein	0.42803	-1.22422	2.40631e-08
cce_0024	hypothetical protein	0.381408	-1.39059	9.42034e-08
cce_0025	hypothetical protein; contains DUF820	0.423598	-1.23923	0.000169602
cce_0026	hypothetical protein	1.7487	0.806284	0.000600261
cce_0027	hypothetical protein; contains a RelA/SpoT domain	0.740342	-0.433736	0.00141804
cce_0029	rfrA family pentapeptide repeat	1.69457	0.760919	4.41918e-05
cce_0031	hypothetical protein	1.46469	0.550595	8.66082e-06
cce_0032	ferrous iron transport protein B; feoB1	0.391405	-1.35327	0.000195937
cce_0033	ferrous iron transport protein A; feoA1	0.277462	-1.84964	1.05922e-05
cce_0034	unknown; contains a Ferritin/ribonucleotide reductase-like domain	1.09954	0.136894	0.0364889
cce_0035	hypothetical protein	0.2286	-2.1291	6.71612e-06
cce_0037	unknown	1.08174	0.113359	0.04431
cce_0038	hypothetical protein	1.7487	0.806284	0.000600261
cce_0039	mannosyl transferase; rfbW	0.394817	-1.34074	2.85866e-06
cce_0042	histidinol-phosphate phosphatase, HAD-superfamily hydrolase subfamily IIIA	1.72593	0.787373	1.44361e-08
cce_0043	phosphoheptose isomerase; gmhA	1.26274	0.336556	4.38217e-05
cce_0045	transposase	0.499623	-1.00109	0.00115098
cce_0049	hypothetical protein; contains DUF172	0.752659	-0.409931	0.0011353
cce_0050	putative addiction module toxin, Txe/YoeB	0.712618	-0.4888	0.0151483
cce_0051	hypothetical protein	0.549702	-0.863278	1.65724e-05
cce_0052	DUF1499-containing protein	1.97307	0.980443	1.61469e-08
cce_0053	unknown; contains a senescence marker protein-30 (SMP-30) domain	2.40614	1.26672	3.6634e-10
cce_0054	polipoprotein diacylglyceryltransferase; lgt	0.847706	-0.238364	0.0166945
cce_0055	putative metal-dependent phosphohydrolase	1.38006	0.464734	0.000291829
cce_0057	hypothetical protein	0.612123	-0.708106	0.0135778
cce_0059	hypothetical protein	0.655933	-0.608381	1.57836e-05
cce_0060	unknown; contains DUF318, transmembrane	0.735006	-0.444172	0.000625741
cce_0067	cation-transporting ATPase, E1-E2 type	0.83201	-0.265327	0.00799311
cce_0068	exopolysaccharide synthesis protein; exoD2	0.59998	-0.737014	0.0025011
cce_0069	unknown	0.359558	-1.4757	2.23762e-12
cce_0071	unknown; contains a GTP-binding protein, HSR1-related domain	1.13015	0.176521	0.0402104
cce_0072	UPF YGGT-containing protein	0.886868	-0.173209	0.0047843
cce_0073	unknown	1.6234	0.699016	1.37619e-06
cce_0074	hypothetical protein	0.667721	-0.582683	0.000174607
cce_0075	hypothetical protein	1.7487	0.806284	0.000600261
cce_0076	putative PilT protein, N-terminal	0.643373	-0.636273	1.07495e-07
cce_0077	5-methyltetrahydrofolate--homocysteine methyltransferase; metH	1.46829	0.554133	0.00167297
cce_0078	chloride channel protein	0.747239	-0.420359	2.29079e-05
cce_0079	hypothetical protein	0.848285	-0.237379	0.0320788
cce_0082	conserved hypothetical protein	1.46475	0.550657	6.20655e-07
cce_0084	putative methyltransferase	0.787184	-0.345227	0.031913
cce_0085	hypothetical protein	0.333802	-1.58294	1.59467e-06
cce_0086	hypothetical protein; contains an alpha/beta hydrolase fold-1 domain	0.778298	-0.361605	0.0022656
cce_0088	unknown	0.876955	-0.189425	0.0135515
cce_0089	CHP1784-containing protein	0.506165	-0.982321	0.00121094
cce_0091	probable potassium efflux transporter	1.40451	0.490067	0.00025591
cce_0092	hypothetical protein	0.448729	-1.15608	9.07114e-06
cce_0093	unknown; contains a toll-Interleukin receptor domain	0.786606	-0.346286	9.09005e-06
cce_0094	unknown	1.58523	0.664696	0.000272284
cce_0096	putative NUDIX hydrolase	0.442141	-1.17742	9.97258e-05
cce_0101	hypothetical protein	0.588796	-0.76416	1.29028e-07
cce_0102	RNA-binding protein	0.811661	-0.301052	2.7975e-05
cce_0103	ribose 5-phosphate isomerase; rpiA	1.1296	0.175808	0.0138151
cce_0104	hypothetical protein	1.7487	0.806284	0.000600261
cce_0105	hypothetical protein; contains a transposase, IS4 domain	1.53173	0.615161	3.84327e-06
cce_0106	hypothetical protein	1.7487	0.806284	0.000600261
cce_0107	reverse transcriptase	1.44854	0.5346	1.29824e-05
cce_0108	conserved hypothetical protein	0.48112	-1.05553	2.25357e-08
cce_0109	hypothetical protein; contains a polysaccharide deacetylase domain	0.700888	-0.512745	0.00595347
cce_0110	unknown; contains a transposase, IS605 OrfB domain	0.858863	-0.2195	0.0464017
cce_0112	unknown	2.83878	1.50527	1.35111e-07
cce_0113	putative transport protein	2.2597	1.17613	5.99685e-14
cce_0115	response regulator	1.1994	0.262311	0.0308193
cce_0119	unknown; contains UPF0150	0.583427	-0.777375	5.1712e-09
cce_0121	unknown; contains DUF306, Meta and HslJ	0.846714	-0.240053	0.0203773
cce_0124	putative ABC transporter, oligopeptides	1.22052	0.287494	1.88939e-05
cce_0126	putative Glycosyl transferase, group 1	0.626573	-0.674445	0.000211965
cce_0127	glucosyl transferase	0.807373	-0.308693	0.00167436
cce_0128	unknown	1.12437	0.169113	0.037455
cce_0129	unknown	1.35228	0.435396	1.2416e-05
cce_0132	hypothetical protein	0.444151	-1.17088	5.07023e-05
cce_0134	putative methyltransferase	1.40736	0.492992	1.69459e-06
cce_0135	putative rehydrin	1.62299	0.698656	1.71019e-06
cce_0139	hypothetical protein; contains a phospholipid/glycerol acyltransferase domain	1.19207	0.253466	0.0101988
cce_0140	hypothetical protein; contains DUF820	0.588953	-0.763777	3.26808e-05
cce_0141	unknown; contains a methyltransferase type 11 domain	0.772849	-0.371741	0.00120731
cce_0142	unknown	1.35127	0.434314	0.010127
cce_0143	hypothetical protein	0.776812	-0.364362	3.20649e-05
cce_0147	unknown	1.27454	0.349979	0.00124415
cce_0148	cation-transporting P-type ATPase, E1-E2 type	0.918514	-0.122626	0.0441611
cce_0149	probable protein phosphatase	3.61242	1.85297	4.08297e-10
cce_0150	putative glycosyl transferase	1.30179	0.380497	1.81156e-06
cce_0151	hypothetical protein	0.707099	-0.500016	0.00609068
cce_0152	putative dTDP-4-dehydrorhamnose reductase	0.771063	-0.375079	0.00311974
cce_0155	light repressed protein; lrtA	1.40367	0.489205	3.40801e-07
cce_0156	hypothetical protein	0.639744	-0.644433	5.80575e-06
cce_0158	hypothetical protein; contains DUF427	0.774473	-0.368713	7.04767e-06
cce_0159	tRNA-guanine transglycosylase; tgt	1.97047	0.978542	1.38589e-06
cce_0160	unknown; contains a MOSC domain	1.74017	0.799228	2.18355e-05
cce_0161	putative membrane protein	2.78147	1.47585	1.28898e-05
cce_0162	hypothetical protein	1.50295	0.587799	0.0173536
cce_0164	two-component sensor histidine kinase	0.823717	-0.27978	0.0013062
cce_0165	two-component response regulator	1.77005	0.823786	0.00134095
cce_0166	putative 268	1.37411	0.458497	2.32038e-06
cce_0167	unknown; contains a CHP147 domain	0.778607	-0.361033	0.00778755
cce_0168	unknown	0.429475	-1.21935	5.52409e-07
cce_0169	hypothetical protein; contains DUF540	0.577007	-0.79334	1.19082e-05
cce_0170	hypothetical protein	0.550083	-0.862279	0.0460987
cce_0171	unknown	0.547226	-0.86979	0.000126542
cce_0175	unknown	2.58627	1.37088	2.11036e-09
cce_0176	unknown	1.81949	0.863534	0.000141924
cce_0177	putative CsbD-like protein	3.58969	1.84386	1.06489e-09
cce_0178	hypothetical protein	1.75823	0.814123	0.000473153
cce_0179	hypothetical protein	1.7487	0.806284	0.000600261
cce_0180	cardiolipin synthase-like protein	1.47522	0.56093	1.91868e-05
cce_0182	hypothetical protein	1.4979	0.582943	0.00540191
cce_0184	transposase	1.7487	0.806284	0.000600261
cce_0185	hypothetical protein	0.270524	-1.88617	1.43892e-06
cce_0191	hypothetical protein	1.47209	0.557862	0.000771932
cce_0192	hypothetical protein	1.39481	0.480068	0.00043575
cce_0193	unknown; contains DUF1400	2.94994	1.56069	1.76496e-08
cce_0194	hypothetical protein	0.334075	-1.58176	1.22571e-06
cce_0196	unknown; contains DUF1400	1.65465	0.726524	0.00102877
cce_0197	putative camphor resistance CrcB protein	0.438791	-1.1884	1.16499e-08
cce_0198	LysR family transcriptional regulatory protein, nitrogen assimilation transcriptional activator; ntcB	0.279692	-1.83809	7.29154e-10
cce_0199	magnesium chelatase, ATPase subunit I; chlI	0.69704	-0.520686	0.00145875
cce_0201	peptidase, S9C	1.23485	0.304338	0.00269909
cce_0203	conserved hypothetical protein	2.05117	1.03645	1.83358e-06
cce_0205	hypothetical protein	0.451595	-1.1469	2.80013e-09
cce_0206	alcohol dehydrogenase	2.19321	1.13304	1.30229e-08
cce_0208	probable peptidase M22, glycoprotease	1.36355	0.447368	0.000299444
cce_0209	unknown; contains a Mechanosensitive ion channel, MscS domain	1.32569	0.406743	0.000578277
cce_0210	cysteine synthase	1.16085	0.215186	0.0185579
cce_0211	hypothetical protein	0.7143	-0.485398	0.00906958
cce_0212	unknown	1.59637	0.674797	1.55262e-08
cce_0213	unknown	1.20854	0.273265	0.009256
cce_0214	conserved hypothetical protein	0.508224	-0.976463	2.38299e-12
cce_0215	hypothetical protein; contains DUF29	0.379254	-1.39876	7.46066e-07
cce_0216	hypothetical protein	1.25541	0.328157	0.00196631
cce_0217	30S ribosomal protein S4; rps4	1.12751	0.173135	0.0293888
cce_0218	hypothetical protein	1.6046	0.682215	0.000377663
cce_0219	30S ribosomal protein S1; rps1-1	0.88584	-0.174883	0.00192866
cce_0220	two-component sensor histidine kinase	1.7592	0.814919	7.78651e-09
cce_0221	hypothetical protein; contains a Rhodanese-like domain	1.38969	0.474764	7.40186e-08
cce_0222	putative glucose 1-dehydrogenase	1.13018	0.176547	0.0113246
cce_0224	50S ribosomal protein L10; rpl10	1.20697	0.271384	3.95054e-05
cce_0227	transcription antitermination protein; nusG	1.10752	0.147329	0.0153252
cce_0229	conserved hypothetical protein	0.640957	-0.6417	4.02566e-07
cce_0230	unknown	0.699036	-0.516561	5.83657e-05
cce_0231	putative RNA polymerase, omega subunit	0.641493	-0.640494	4.27052e-05
cce_0232	L-argininosuccinate lyase; argH	1.14037	0.189496	0.00341697
cce_0233	hypothetical protein	0.66406	-0.590615	3.60484e-08
cce_0234	unknown; contains a stage II sporulation E domain	1.14921	0.200648	0.0480943
cce_0235	unknown	1.99084	0.993375	1.19968e-07
cce_0236	hypothetical protein; contains DUF6, transmembrane	1.2771	0.352876	0.00434648
cce_0237	conserved hypothetical protein	1.36282	0.446592	0.00123736
cce_0238	hypothetical protein; contains a putative thiol-disulphide oxidoreductase DCC domain	1.21889	0.28557	0.00205116
cce_0239	hypothetical protein; contains a Na-Ca exchanger/integrin-beta4 domain	1.21685	0.283153	0.018084
cce_0240	UDP-N-acetylmuramoylalanine-D-glutamate ligase; murD	1.33232	0.413942	0.00058721
cce_0241	hypothetical protein; contains a UbiA prenyltransferase domain	0.742535	-0.429469	0.000783946
cce_0243	glycosyl transferase, group 1	1.26212	0.335845	0.00116823
cce_0244	unknown; contains DUF187	1.44297	0.529042	8.116e-05
cce_0245	putative inner-membrane translocator	1.58769	0.666927	2.34241e-06
cce_0246	putative DNA-binding protein, starvation-inducible	0.857553	-0.221702	0.000115007
cce_0247	unknown; contains a Mechanosensitive ion channel, MscS domain	1.9055	0.930168	5.78459e-07
cce_0250	hypothetical protein	2.23266	1.15876	1.13387e-07
cce_0251	putative sodium/sulfate transporter, DASS family	0.711989	-0.490073	0.00123655
cce_0255	unknown	0.358622	-1.47946	1.61684e-13
cce_0256	conserved hypothetical protein	0.499499	-1.00145	2.73845e-06
cce_0257	two-component sensor histidine kinase	1.78453	0.835547	0.000103216
cce_0259	unknown	24.2542	4.60016	5.30761e-13
cce_0261	putative transposase	2.18404	1.127	6.29654e-05
cce_0262	conserved hypothetical protein	0.608351	-0.717023	1.72719e-06
cce_0263	3-dehydroquinate dehydratase; aroQ	0.63232	-0.661274	2.58554e-05
cce_0265	unknown	0.812298	-0.29992	2.98849e-05
cce_0266	hypothetical protein	0.775073	-0.367596	0.0256804
cce_0267	photosystem II D1 protein; psbA3	1.90155	0.927178	6.28787e-09
cce_0268	putative HAD-superfamily phosphatase subfamily IIIA protein	1.56308	0.644395	8.63783e-07
cce_0269	conserved hypothetical protein	1.44934	0.535395	0.000138135
cce_0270	unknown	2.08957	1.0632	3.67306e-08
cce_0271	probable alpha amylase	1.59453	0.673127	0.00802369
cce_0272	hypothetical protein	2.02719	1.01948	3.51001e-07
cce_0273	hypothetical protein	1.79701	0.845595	2.1198e-06
cce_0276	ATP-binding protein of sugar ABC transportor	1.54495	0.627564	4.11586e-05
cce_0277	ribonuclease E; rne	1.40482	0.490384	1.53228e-08
cce_0278	rfrA family pentapeptide repeat	0.759394	-0.397079	0.0353904
cce_0283	conserved hypothetical protein	1.31933	0.39981	0.00358479
cce_0285	photosystem I assembly related protein; ycf3	0.809122	-0.305571	8.4789e-05
cce_0288	conserved hypothetical protein	1.60524	0.682791	1.63835e-10
cce_0290	30S ribosomal protein S21; rps21-2	0.738685	-0.436969	0.000247432
cce_0291	unknown; contains a heat shock protein DnaJ, N-terminal domain	1.26797	0.342516	0.00079244
cce_0292	pyruvate dehydrogenase E1 component alpha subunit; pdhA	1.83757	0.877801	1.22786e-08
cce_0295	CHP_MG423-containing protein	1.73893	0.798197	3.38094e-05
cce_0297	two-component sensor histidine kinase	0.648742	-0.624282	8.03783e-07
cce_0299	DNA mismatch repair protein; mutL	0.84381	-0.24501	0.00676001
cce_0300	hypothetical protein	0.460077	-1.12005	1.00862e-07
cce_0301	unknown; contains glutathione S-transferase, C-terminal-like and Thioredoxin fold domains	1.25902	0.332304	0.00232552
cce_0302	bicarbontate transport system ATP-binding protein; cmpD	1.36789	0.451951	5.30134e-06
cce_0304	bicarbontate transport system permease protein; cmpB	1.69242	0.759086	0.00498963
cce_0306	unknown	0.505362	-0.984612	0.000596714
cce_0307	bifunctional glycine oxidase/thiamine biosynthesis protein; thiOG	1.31732	0.397604	1.92274e-07
cce_0308	unknown	1.24717	0.318656	0.00202913
cce_0310	putative arylsulfatase regulatory protein; aslB	1.39479	0.480043	0.00919492
cce_0313	putative extracellular solute-binding protein, family 3	2.34564	1.22998	1.20319e-07
cce_0314	3-methyl-2-oxobutanoate hydroxymethyltransferase; panB	1.31662	0.396839	3.94791e-07
cce_0316	probable serin-threonin phosphatase	1.41994	0.505829	4.07594e-06
cce_0317	unknown; contains an ABC-1 domain	0.806447	-0.310348	0.032308
cce_0318	unknown	0.627912	-0.671366	0.000700395
cce_0319	putative S-layer OprB family carbohydrate-selective porin	2.42871	1.28019	1.43797e-09
cce_0320	light-dependent protochlorophyllide reductase; por	1.31734	0.397629	2.2609e-09
cce_0321	hypothetical protein	0.471394	-1.085	3.99279e-07
cce_0324	unknown; contains DUF58	1.47121	0.557008	5.28927e-09
cce_0325	hypothetical protein	0.55758	-0.842749	5.88196e-06
cce_0326	hypothetical protein	0.515726	-0.955324	3.4822e-06
cce_0328	putative peptidase	1.26376	0.337718	0.0144169
cce_0330	conserved hypothetical protein	1.32173	0.402427	0.00380784
cce_0332	hypothetical protein; contains DUF124	0.49561	-1.01272	1.14741e-09
cce_0333	conserved hypothetical protein	0.747027	-0.420767	8.15401e-07
cce_0334	unknown	0.848434	-0.237125	0.00688373
cce_0335	putative Prokaryotic chromosome segregation and condensation protein ScpA	1.95326	0.965884	5.57468e-05
cce_0336	mannose-1-phosphate guanyltransferase	1.21088	0.27606	0.00277405
cce_0337	unknown	0.844519	-0.243797	0.0291813
cce_0339	UPF0047-containing protein	0.583668	-0.776781	1.10867e-05
cce_0340	unknown; contains DUF187	0.859672	-0.218142	0.0141969
cce_0343	hypothetical protein; contains DUF172	0.638902	-0.646334	0.00567998
cce_0344	hypothetical protein	0.411965	-1.27941	0.000896115
cce_0345	unknown	1.3233	0.404136	0.0136085
cce_0346	hypothetical protein	1.46141	0.547357	0.0176694
cce_0347	DUF196-containing protein	2.54983	1.3504	2.5152e-11
cce_0348	DUF48-containing protein	1.39803	0.483394	0.00245252
cce_0349	hypothetical protein	1.7487	0.806284	0.000600261
cce_0350	hypothetical protein	0.736641	-0.440966	0.00793967
cce_0352	unknown; contains DUF820	1.49402	0.579197	0.000392961
cce_0353	hypothetical protein	1.61966	0.695688	1.47258e-05
cce_0354	hypothetical protein	1.40038	0.48582	0.00407229
cce_0355	DUF324-containing protein	1.96271	0.972845	4.50417e-06
cce_0356	hypothetical protein	1.6189	0.695015	0.000105815
cce_0357	hypothetical protein; contains DUF324	1.59359	0.672281	4.41058e-05
cce_0358	transposase	1.7487	0.806284	0.000600261
cce_0359	putative NrtC-like protein	1.67682	0.745724	8.41494e-07
cce_0360	hypothetical protein	1.25109	0.323191	1.65208e-06
cce_0362	putative exonuclease SbcC	0.817944	-0.289926	0.000279246
cce_0363	conserved hypothetical protein	0.529021	-0.918603	5.9753e-06
cce_0365	histidine triad family protein	1.90546	0.930141	8.9886e-07
cce_0368	ATP-binding protein of ABC transporter	1.19005	0.251018	1.83657e-05
cce_0369	hypothetical protein; contains a pyridoxamine 5'-phosphate oxidase-related, FMN-binding domain	1.14344	0.193387	0.0393139
cce_0370	protease	1.2542	0.326769	0.00499769
cce_0371	DNA-damage-inducible/multi antimicrobial extrusion protein; matE2	1.91669	0.938616	1.03335e-06
cce_0372	unknown; contains EAL, Chase2 and GGDEF domains	0.686443	-0.542788	0.000718884
cce_0373	DUF928-containing protein	2.8546	1.51329	2.59791e-10
cce_0376	hypothetical protein	0.184459	-2.43863	4.23051e-08
cce_0378	glycosyl transferase, family 2	0.860113	-0.217401	0.036653
cce_0379	putative methyltransferase	1.64236	0.715771	1.09846e-05
cce_0383	hypothetical protein	0.874873	-0.192855	0.0470954
cce_0384	deoxyuridine 5'triphosphate nucleotidohydrolase	1.34654	0.429261	0.000753503
cce_0386	hypothetical protein	1.7487	0.806284	0.000600261
cce_0388	cation transporter, P-type ATPase family, E1-E2 type	1.58872	0.667863	3.08818e-07
cce_0389	unknown; contains a TrkA-N domain	1.17744	0.235655	0.00692213
cce_0392	photosystem II protein T; psbT	0.44322	-1.17391	5.10221e-13
cce_0393	conserved hypothetical protein	1.30632	0.385507	6.93556e-05
cce_0394	glycoside hydrolase family 13, putative neopullulanase; npl	1.20671	0.271073	0.000693529
cce_0395	nitrilase/cyanide hydratase and apolipoprotein N-acyltransferase	1.57831	0.658384	3.00838e-10
cce_0397	hypothetical protein; contains a HTTM domain	0.426159	-1.23054	1.2071e-05
cce_0398	hypothetical protein	0.409394	-1.28844	9.34439e-06
cce_0399	probable ABC transporter periplasmic branched chain amino acid binding protein; natB	1.32638	0.40749	4.87083e-05
cce_0406	hypothetical protein	1.27158	0.346623	0.0221013
cce_0408	hypothetical protein; contains a HNH endonuclease domain	0.518051	-0.948833	2.79081e-06
cce_0409	conserved hypothetical protein	0.824594	-0.278245	0.00436997
cce_0410	reverse transcriptase	4.85667	2.27997	2.61244e-09
cce_0411	putative acetyl transferase	0.706574	-0.501087	6.58951e-06
cce_0412	glycosyl transferase, family 2	0.788954	-0.341987	0.0010164
cce_0413	unknown; contains a secretion protein HlyD domain	1.19287	0.254432	0.0242933
cce_0414	RND multidrug efflux transporter	0.834105	-0.261699	0.00241154
cce_0415	hypothetical protein; contains FbpA fibronectin-binding and DUF814 domains	1.97531	0.982077	1.00498e-08
cce_0416	unknown	1.85108	0.888368	0.000127604
cce_0417	unknown	1.53303	0.616387	0.00089845
cce_0418	pilin biogenesis protein; pilC	1.77004	0.823782	0.000511877
cce_0419	twitching motility protein; pilT1	1.75797	0.813911	1.48353e-07
cce_0421	hypothetical protein	0.141001	-2.82623	0.000122014
cce_0422	circadian clock protein; kaiC1	2.1409	1.09822	4.05353e-08
cce_0423	circadian clock protein; kaiB1	1.54682	0.629305	2.02161e-08
cce_0425	unknown	0.606406	-0.721645	0.000239256
cce_0426	phosphoribosylglycinamide formyltransferase; purN	0.468141	-1.09498	2.96495e-07
cce_0427	probable oxygenase	0.515294	-0.956531	2.45678e-07
cce_0428	conserved hypothetical protein	0.653169	-0.614472	9.19988e-09
cce_0429	putative prokaryotic chromosome segregation and condensation protein ScpB	0.718243	-0.477455	3.35799e-06
cce_0430	conserved hypothetical protein	0.806511	-0.310234	0.00167346
cce_0431	hypothetical protein	0.884075	-0.177759	0.00304987
cce_0432	hypothetical protein	0.416101	-1.265	5.25607e-13
cce_0433	conserved hypothetical protein	2.53892	1.34421	9.92349e-08
cce_0436	UPF0136-containing protein	0.760821	-0.394372	0.0148697
cce_0437	conserved hypothetical protein	1.1275	0.173132	0.0451761
cce_0438	S-adenosylmethionine:tRNA ribosyltransferase-isomerase; queA	0.808377	-0.306899	0.000752099
cce_0444	methyl accepting chemotaxis protein	0.759372	-0.39712	0.00448144
cce_0445	probable chemotaxis protein; cheW	1.87637	0.907942	7.26854e-06
cce_0446	two-component response regulator	1.387	0.47197	0.000523928
cce_0447	hypothetical protein	1.83557	0.876231	2.96374e-06
cce_0449	unknown	2.25182	1.17109	6.21553e-09
cce_0452	hypothetical protein; contains a transcriptional regulator, Rrf2 domain	1.15482	0.207672	0.0271879
cce_0453	putative transcriptional regulator AbrB	0.737995	-0.438317	2.37297e-07
cce_0456	thioredoxin-like protein	1.13437	0.181891	0.0379107
cce_0457	probable polysaccharide deacetylase	1.11807	0.161016	0.0225569
cce_0460	enoyl-[acyl-carrier-protein] reductase; fabI	1.54971	0.631995	7.55216e-06
cce_0461	nitrogen-responsive regulatory protein; ntcA	0.762663	-0.390882	0.0109871
cce_0462	conserved hypothetical protein	0.280599	-1.83342	1.6836e-07
cce_0463	putative resolvase, RNase H-like fold	0.457376	-1.12855	1.61035e-07
cce_0464	unknown; contains a Sulfotransferase domain	0.510769	-0.969258	3.90463e-06
cce_0465	conserved hypothetical protein	0.673727	-0.569763	0.000477377
cce_0466	hypothetical protein	1.56627	0.647336	0.00194083
cce_0467	conserved hypothetical protein	1.75414	0.810763	1.1386e-06
cce_0468	hypothetical protein; contains a MFS 1 domain	1.62591	0.701246	2.09829e-07
cce_0469	conserved hypothetical protein	0.444032	-1.17126	1.37009e-09
cce_0470	hypothetical protein; contains an Anti-sigma factor antagonist domain	0.57171	-0.806644	3.03479e-06
cce_0471	unknown; contains UPF0004	0.793767	-0.333213	1.05522e-05
cce_0472	XisI-like fdxN element excision controlling factor protein	0.642086	-0.639161	2.14294e-05
cce_0473	hypothetical protein	0.726405	-0.461154	0.00161265
cce_0474	conserved hypothetical protein	0.220691	-2.1799	1.43496e-06
cce_0475	glutathione S-transferase; gst4	0.232118	-2.10707	1.02427e-09
cce_0477	hypothetical protein; contains a Thioredoxin fold domain	0.199452	-2.32589	5.19835e-07
cce_0478	conserved hypothetical protein	0.135273	-2.88606	1.18516e-08
cce_0479	probable nutrient-stress induced DNA binding protein	0.409357	-1.28857	1.00168e-09
cce_0480	hypothetical protein; contains a rare lipoprotein A domain	1.18241	0.241731	0.0104499
cce_0481	unknown; contains TPR_1 tetratricopeptide repeat domains	0.685228	-0.545343	3.75166e-05
cce_0482	putative heavy metal transport/detoxification protein	0.716664	-0.480631	0.000208323
cce_0483	hypothetical protein; contains a Glyoxalase/extradiol ring-cleavage dioxygenase domain	0.183277	-2.4479	7.04038e-08
cce_0489	hypothetical protein; contains a MscS mechanosensitive ion channel and a cyclic nucleotide-binding domain	0.508629	-0.975315	0.00150247
cce_0491	glutaredoxin; grxC1	0.774527	-0.368612	6.02578e-06
cce_0492	hypothetical protein; contains rfrA pentapeptide repeat and TPR_1 tetratricopeptide repeat domains	1.40163	0.487105	0.00052704
cce_0493	6-pyruvoyl tetrahydropterin synthase; ptpS	1.58853	0.667695	3.30623e-06
cce_0494	unknown	1.45149	0.537535	4.36029e-09
cce_0495	hypothetical protein	0.879652	-0.184995	0.0230735
cce_0496	hypothetical protein	0.466424	-1.10029	2.41108e-10
cce_0498	hypothetical protein	2.23555	1.16063	8.96953e-08
cce_0499	cytochrome c assembly protein	1.32979	0.411197	0.000316278
cce_0500	hypothetical protein	1.18454	0.244325	0.00510037
cce_0501	hypothetical protein	1.26927	0.343997	0.000397627
cce_0502	bifunctional orotidine-5'-phosphate decarboxylase/orotate phosphoribosyltransferase protein; pyrFE	1.31437	0.394373	1.60753e-05
cce_0503	Holliday junction DNA helicase; ruvB	2.72017	1.4437	2.08844e-09
cce_0505	peptidyl-prolyl cis-trans isomerase	1.34509	0.427704	6.08538e-09
cce_0506	unknown	2.10644	1.07481	7.05203e-08
cce_0507	unknown	1.89394	0.921392	2.52914e-06
cce_0508	putative phosphoenolpyruvate carboxykinase (ATP)	2.42587	1.27851	1.07144e-06
cce_0511	hypothetical protein	0.503946	-0.988659	1.05461e-07
cce_0512	unknown	0.700001	-0.514572	0.00846497
cce_0513	unknown; contains a macrocin-O-methyltransferase domain	0.692802	-0.529486	0.00177061
cce_0515	probable glycosyl transferase, group 1	1.31796	0.398307	0.000133727
cce_0516	glycosyl transferase, group 1	0.651644	-0.617843	0.000155247
cce_0517	unknown; contains a glycosyl transferase, family 2 domain	0.609882	-0.713399	2.65335e-05
cce_0521	hypothetical protein; contains a methyltransferase FkbM domain	1.18165	0.2408	0.0226881
cce_0522	hypothetical protein; contains a methyltransferase FkbM domain	0.858361	-0.220344	0.0134964
cce_0524	unknown; contains a glycosyl transferase, group 1 domain	0.771529	-0.374208	0.00451978
cce_0525	unknown; contains a glycosyl transferase, family 2 domain	0.499756	-1.0007	1.39242e-08
cce_0528	hypothetical protein	0.581014	-0.783356	2.03607e-05
cce_0530	putative adenylate cyclase	0.649367	-0.622894	8.09202e-05
cce_0531	hypothetical protein	0.423623	-1.23915	1.64974e-05
cce_0532	hypothetical protein; contains a thioredoxin fold domain	0.621076	-0.687158	3.20452e-05
cce_0533	hypothetical protein	0.358864	-1.47849	8.29114e-09
cce_0535	unknown	0.455511	-1.13444	6.54571e-06
cce_0536	unknown	4.0427	2.01532	1.43297e-12
cce_0537	unknown	22.5251	4.49346	1.34339e-14
cce_0540	Fmu, rRNA SAM-dependent methyltransferase	1.91048	0.933937	1.00562e-11
cce_0541	unknown	0.781822	-0.355088	0.00666691
cce_0542	hypothetical protein	0.713735	-0.48654	1.30243e-06
cce_0545	putative Nitrogenase-associated protein	0.0801868	-3.64049	2.23428e-13
cce_0546	hypothetical protein; contains a thioredoxin fold domain	0.102369	-3.28815	1.45446e-12
cce_0547	nifT/fixU	0.174131	-2.52176	5.15036e-09
cce_0549	homocitrate synthase; nifV	0.199921	-2.3225	3.16194e-13
cce_0550	conserved hypothetical protein	0.0107701	-6.53683	9.0153e-15
cce_0551	hypothetical protein	0.0383412	-4.70496	1.71715e-11
cce_0552	conserved hypothetical protein	0.0122233	-6.35422	2.94005e-13
cce_0553	serine O-acetyltransferase; cysE2	0.00907582	-6.78376	9.34892e-15
cce_0555	hypothetical protein	0.00513726	-7.60478	7.13965e-11
cce_0556	4Fe-4S ferredoxin	0.0255338	-5.29145	7.6669e-14
cce_0558	iron-sulfur cluster assembly protein; nifU	0.033881	-4.88338	1.87984e-14
cce_0559	nitrogenase iron protein; nifH	0.0115113	-6.4408	7.07211e-16
cce_0561	nitrogenase molybdenum-iron protein beta chain; nifK	0.0833367	-3.5849	2.2538e-09
cce_0562	hypothetical protein; contains a Mo-dependent nitrogenase, C-terminal domain	0.0390078	-4.68009	7.69688e-08
cce_0563	nitrogenase molybdenum-iron cofactor biosynthesis protein; nifE	0.0582952	-4.10048	2.43191e-16
cce_0564	nitrogenase molybdenum-iron cofactor biosynthesis protein; nifN	0.106839	-3.22649	2.01211e-16
cce_0566	DUF269-containing protein	0.115106	-3.11897	1.15282e-13
cce_0567	DUF683-containing protein	0.113447	-3.13992	3.36087e-10
cce_0568	nitrogen fixation protein; nifW	0.120676	-3.05079	1.65303e-13
cce_0569	putative molybdenum cofactor biosynthesis/nitrogen fixation related protein; hesA	0.128374	-2.96158	1.37974e-15
cce_0570	Fe-S cluster biosynthesis, putative nitrogen fixation related protein; hesB/yadR/yfhF	0.0808143	-3.62925	1.444e-13
cce_0571	2Fe-2S ferredoxin, putative nitrogen fixation related protein	0.0467534	-4.41878	3.70381e-11
cce_0572	hypothetical protein	0.0441007	-4.50305	2.62608e-07
cce_0573	conserved hypothetical protein	0.0375352	-4.73561	4.59266e-09
cce_0574	GTP-binding protein, HSR1-related	0.00258276	-8.59687	1.75181e-11
cce_0575	ferrous iron transport protein B; feoB2	0.00524959	-7.57358	5.3846e-11
cce_0577	hypothetical protein; contains DUF81	0.0328066	-4.92987	4.00461e-08
cce_0578	putative molybdate ABC transporter, permease protein	0.417078	-1.26161	1.47346e-06
cce_0579	4Fe-4S ferredoxin; fdxB	0.240936	-2.05328	1.31894e-09
cce_0582	hypothetical protein	0.829081	-0.270416	0.0271015
cce_0583	hypothetical protein; contains a PilT protein, N-terminal domain	0.764114	-0.388141	0.010397
cce_0584	conserved hypothetical protein	0.811464	-0.301402	0.00321932
cce_0585	hypothetical protein; contains DUF433	0.733104	-0.44791	6.12186e-06
cce_0586	unknown	0.307268	-1.70243	2.4974e-10
cce_0587	hypothetical protein; contains a phosphoribosyltransferase domain	0.276128	-1.85659	5.17559e-07
cce_0588	unknown; contains TPR_1 tetratricopeptide repeat domains	1.21674	0.283021	0.0132839
cce_0589	cytochrome c family protein	0.446588	-1.16298	1.13619e-12
cce_0591	KHG-KDPG bifunctional aldolase	0.617581	-0.6953	7.92867e-08
cce_0592	hypothetical protein	0.557643	-0.842586	4.6949e-06
cce_0593	protease	2.19949	1.13717	3.01607e-06
cce_0594	glutamate 5-kinase; proB	2.25653	1.17411	4.89564e-08
cce_0595	glucokinase; glk	2.2963	1.19931	1.90688e-08
cce_0596	mrr restriction system protein	1.7487	0.806284	0.000600261
cce_0598	unknown; contains an S-layer homology (SLH) domain	1.15923	0.213164	0.0377299
cce_0599	conserved hypothetical protein	1.92322	0.943521	4.14186e-11
cce_0600	exopolyphosphatase; ppx	1.89775	0.924292	4.13571e-08
cce_0602	probable CAB/ELIP/HLIP family protein	1.74221	0.800918	0.000595917
cce_0605	protein involved in constitutive low affinity CO2 uptake; cupA	3.20407	1.67991	1.06818e-08
cce_0607	putative ribonuclease H	0.769321	-0.378343	0.000997557
cce_0608	unknown	1.33015	0.411592	0.0155082
cce_0609	unknown	1.40372	0.48926	1.22813e-05
cce_0610	unknown	1.27979	0.35591	0.00127483
cce_0611	magnesium chelatase, subunit H; chlH2	1.24066	0.311111	0.00742039
cce_0613	unknown	0.721873	-0.470182	0.000398638
cce_0615	hypothetical protein	1.15509	0.208007	0.00574445
cce_0616	unknown; contains a methyltransferase type 12 domain	1.87243	0.904914	1.72677e-07
cce_0617	glycosyl transferase, group 1	2.27167	1.18376	6.22934e-09
cce_0618	hypothetical protein; contains DUF820	1.64952	0.722043	2.17392e-08
cce_0619	dTDP-glucose 4,6-dehydratase; rfbB1	1.65477	0.726631	4.13384e-07
cce_0620	hypothetical protein; contains DUF29	1.86576	0.899767	1.13139e-06
cce_0621	unknown	0.74257	-0.429401	9.74279e-06
cce_0622	conserved hypothetical protein	0.416622	-1.26319	5.28475e-06
cce_0623	polyribonucleotide nucleotidyltransferase; pnp	1.65211	0.724313	2.06253e-07
cce_0624	FAD-dependent pyridine nucleotide-disulphide oxidoreductase	0.67759	-0.561516	1.66355e-07
cce_0625	unknown; contains DUF820	0.574104	-0.800617	1.41823e-06
cce_0626	putative acetyltransferase	0.632435	-0.66101	0.000203159
cce_0627	unknown; contains a TPR-like helical domain	0.622657	-0.683492	0.00167169
cce_0629	putative CP12	0.6265	-0.674613	5.54236e-06
cce_0631	unknown; contains DUF820	0.830336	-0.268233	0.000687896
cce_0633	unknown	0.362518	-1.46388	2.72867e-07
cce_0635	hypothetical protein	0.647749	-0.626493	0.0108172
cce_0636	photosystem II D1 protein; psbA5	1.61874	0.694869	3.44284e-05
cce_0637	putative MgtC family transporter protein	0.697791	-0.519132	0.0235848
cce_0638	putative reverse transcriptase	4.97569	2.3149	4.34273e-13
cce_0641	ATP-dependent Clp protease, proteolytic subunit; clpP1	1.06735	0.0940364	0.0030659
cce_0642	hypothetical protein; contains DUF21 and CBS domains	0.638914	-0.646307	7.56092e-07
cce_0643	conserved hypothetical protein	0.527551	-0.922617	1.25339e-06
cce_0646	ABC transporter membrane fusion protein, probable glycolipid exporter; devB	1.62951	0.704441	0.0111293
cce_0647	hypothetical protein	0.558163	-0.841242	5.0401e-11
cce_0648	ABC transporter permease protein, probable glycolipid exporter; devC	0.670623	-0.576426	4.46451e-07
cce_0649	hypothetical protein	0.842645	-0.247003	0.000117217
cce_0650	UPF YGGT-containing protein	1.09657	0.132997	0.0233202
cce_0651	putative pyridoxamine 5-phosphate oxidase, FMN-binding	0.627718	-0.67181	4.191e-05
cce_0652	hypothetical protein	1.92643	0.945929	7.61383e-06
cce_0655	conserved hypothetical protein	0.479427	-1.06062	3.94609e-08
cce_0656	two-component hybrid sensor and regulator	0.705111	-0.504077	6.19181e-08
cce_0658	unknown; contains an Armadillo-like helical domain	0.709108	-0.495922	1.16651e-05
cce_0659	photosystem II CP43 protein, chlorophyll-binding protein CP43; psbC	1.92187	0.942507	5.58776e-08
cce_0661	putative GatB/Yqey	1.71308	0.776588	9.73038e-08
cce_0662	unknown; contains a CHAD domain	1.30355	0.382443	0.000169773
cce_0664	hypothetical protein	0.753394	-0.408523	0.00982377
cce_0665	hypothetical protein	0.23237	-2.1055	1.80664e-06
cce_0668	hypothetical protein	0.340311	-1.55507	9.45621e-06
cce_0669	6-phosphofructokinase; pfkA1	1.18722	0.247585	0.000244176
cce_0670	putative type I restriction-modification system, M subunit protein	0.883915	-0.17802	0.0138212
cce_0671	putative type I restriction-modification system, M subunit protein	0.713184	-0.487653	0.0411625
cce_0672	hypothetical protein	0.641947	-0.639473	6.27919e-05
cce_0673	unknown	0.832137	-0.265107	0.000684872
cce_0674	hypothetical protein	0.517436	-0.950547	1.43404e-05
cce_0675	sterol desaturase family protein	1.84117	0.880624	3.74248e-08
cce_0677	hypothetical protein	1.7487	0.806284	0.000600261
cce_0678	two-component response regulator	1.68974	0.756805	3.4873e-06
cce_0679	ferredoxin-like protein	1.32768	0.408904	0.00325042
cce_0680	unknown	0.606353	-0.721771	3.51705e-07
cce_0683	putative transcriptional regulator	1.39306	0.478254	8.41343e-06
cce_0684	hypothetical protein	0.728168	-0.457657	1.35419e-05
cce_0685	iron-sulfur assembly protein; sufB	0.7026	-0.509224	1.22463e-09
cce_0687	hypothetical protein	0.25557	-1.96821	2.1547e-07
cce_0688	nucleoside diphosphate kinase; ndk	1.33145	0.413002	0.000323882
cce_0690	probable phosphonate ABC transporter, phosphate-binding protein	1.7487	0.806284	0.000600261
cce_0691	putative 4-oxalocrotonate tautomerase	0.696349	-0.522117	0.0113685
cce_0692	unknown; contains a GCN5-related N-acetyltransferase domain	0.398131	-1.32868	8.62954e-10
cce_0693	unknown	1.49088	0.576168	7.69264e-05
cce_0694	unknown; contains a methyltransferase type 11 domain	1.16536	0.220774	0.00239116
cce_0695	cytochrome P450	1.95912	0.970205	0.000612235
cce_0696	hypothetical protein	1.90351	0.928661	0.0134576
cce_0697	putative acetyltransferase, Eis type	1.73238	0.792755	0.00552284
cce_0699	hypothetical protein	2.09873	1.06952	0.00364167
cce_0700	hypothetical protein	0.564273	-0.825536	1.9041e-07
cce_0702	serine/threonine protein phosphatase	0.782049	-0.35467	2.06263e-07
cce_0703	unknown	1.25144	0.323593	0.00200146
cce_0705	30S ribosomal protein S2; rps2	1.88005	0.910769	2.08379e-08
cce_0706	molybdopterin (MPT) converting factor, subunit 2; moaE	1.2459	0.317191	7.7175e-06
cce_0708	leucine aminopeptidase	3.27707	1.7124	6.75898e-15
cce_0709	hypothetical protein	3.35376	1.74578	6.97103e-07
cce_0710	unknown	2.75884	1.46406	1.06595e-09
cce_0711	glycosyl transferase, group 1	0.326696	-1.61398	4.63786e-08
cce_0712	two-component response regulator	1.53741	0.620498	0.019991
cce_0713	two-component response regulator	0.653321	-0.614135	5.55062e-06
cce_0716	two-component hybrid sensor and regulator	0.747899	-0.419085	0.000354363
cce_0717	hypothetical protein	0.277063	-1.85172	1.02e-06
cce_0718	putative glutamate--cysteine ligase	2.04406	1.03144	1.79109e-06
cce_0719	probable tRNA/rRNA methyltransferase	1.5644	0.645612	4.20313e-05
cce_0720	putative peptidoglycan-binding peptidase, M23B family	1.94117	0.956927	9.54931e-08
cce_0721	hypothetical protein; contains a Phage integrase-like, catalytic core domain	1.49781	0.582854	0.000198319
cce_0723	hypothetical protein	0.408967	-1.28994	0.000104657
cce_0724	hypothetical protein	1.7487	0.806284	0.000600261
cce_0727	unknown; contains a winged helix repressor DNA-binding domain	0.743373	-0.427841	0.0118821
cce_0728	hypothetical protein	0.834035	-0.261821	0.00508875
cce_0729	hypothetical protein; contains DUF124	0.791161	-0.337958	0.000757388
cce_0733	hypothetical protein	0.389184	-1.36148	7.12838e-11
cce_0734	hypothetical protein; contains a quinoprotein amine dehydrogenase, beta chain-like domain	0.702275	-0.509892	1.7459e-06
cce_0735	dihydrolipoamide dehydrogenase; lpdA	1.69042	0.757379	5.36614e-10
cce_0739	WD40-like beta-propeller protein	0.84786	-0.238101	0.0415796
cce_0741	conserved hypothetical protein	0.74726	-0.420318	6.20622e-05
cce_0742	unknown	0.785711	-0.347929	0.00107982
cce_0743	serine/threonine protein kinase	1.1725	0.229588	0.043173
cce_0746	DUF37-containing protein	0.807569	-0.308342	0.00090246
cce_0747	putative adenosine deaminase	0.738254	-0.437811	0.000762923
cce_0749	hypothetical protein; contains a peptidase M48, Ste24p domain	1.38945	0.474515	0.0145046
cce_0750	hypothetical protein	0.897046	-0.156746	0.00849216
cce_0751	hypothetical protein; contains a glycosyl transferase, family 2 domain	0.784756	-0.349684	9.7009e-05
cce_0753	probable HAD-superfamily hydrolase, subfamily IA, variant 1	0.856527	-0.22343	0.00426307
cce_0754	two-component response regulator	1.3297	0.411095	5.62563e-05
cce_0755	hypothetical protein	0.880249	-0.184017	0.00594579
cce_0756	hypothetical protein	0.616319	-0.698251	6.53855e-06
cce_0757	unknown	0.511172	-0.968118	1.92345e-13
cce_0758	DNA gyrase B subunit; gyrB	1.4226	0.508531	0.000258928
cce_0759	unknown	0.750609	-0.413867	0.0052656
cce_0760	unknown	0.792524	-0.335473	2.48809e-06
cce_0764	unknown; contains TPR_1 tetratricopeptide repeat domains	0.760283	-0.395391	1.64344e-05
cce_0765	hypothetical protein	1.30391	0.382845	0.00115593
cce_0770	phosphoglucomutase/phosphomannomutase	1.81735	0.861833	4.41717e-09
cce_0771	hypothetical protein; contains a ferredoxin domain	0.820609	-0.285233	0.00401965
cce_0772	unknown; contains a FAD dependent oxidoreductase domain	0.69612	-0.522592	0.0018383
cce_0775	unknown; contains a FAD dependent oxidoreductase domain	1.41978	0.505663	0.00792355
cce_0776	photosystem II protein Q; psbQ	2.03535	1.02528	7.89791e-09
cce_0777	putative hydrolase	1.41009	0.495788	3.28562e-07
cce_0778	unknown; contains a Ferritin/ribonucleotide reductase-like domain	0.81838	-0.289157	1.07763e-05
cce_0779	extracellular solute-binding protein, family 5	1.92527	0.945058	6.506e-11
cce_0780	permease protein of oligopeptide ABC transporter	1.6182	0.694387	0.000373823
cce_0781	unknown; contains a bacterial regulatory factor, effector domain	1.27659	0.352299	0.000887269
cce_0782	aldo/keto reductase	1.4263	0.512281	9.07846e-05
cce_0783	hypothetical protein; contains a mechanosensitive ion channel domain	0.436895	-1.19464	7.10728e-08
cce_0784	gid protein	2.8545	1.51324	1.18931e-08
cce_0785	hypothetical protein; contains DUF820	1.2856	0.362438	0.00530454
cce_0786	hypothetical protein	0.582513	-0.779637	0.00172101
cce_0787	hypothetical protein	0.671406	-0.574742	0.0115914
cce_0789	hypothetical protein; contains a phosphoesterase cyanobacterial, all2852 domain	1.89142	0.919469	1.11489e-06
cce_0790	CHP91-containing protein	0.501934	-0.994431	2.97222e-05
cce_0791	hypothetical protein	0.605629	-0.723494	0.0013976
cce_0792	hypothetical protein; contains DUF411 and Thioredoxin fold domains	1.09091	0.125533	0.000812729
cce_0793	unknown; contains a cupredoxin domain	1.44773	0.53379	0.000256072
cce_0794	hypothetical protein	0.833275	-0.263136	0.00748223
cce_0795	unknown; contains a peptidase M48, Ste24p domain	0.535552	-0.900902	0.000556056
cce_0796	conserved hypothetical protein	0.142945	-2.80647	1.06473e-07
cce_0798	ribulose-phosphate 3-epimerase; rpe	1.32205	0.402774	0.000491233
cce_0800	acetate kinase; ackA1	1.20978	0.274751	0.00131686
cce_0801	50s ribosomal protein L19; rpl19	0.677347	-0.562034	2.48948e-09
cce_0802	cob(I)alamin adenosyltransferase; cobO/cobP/btuR	1.17763	0.235884	1.20452e-05
cce_0803	putative Maf-like protein	1.14468	0.19495	0.000504767
cce_0804	photosystem II oxygen evolving complex protein PsbP, 23 kD extrinsic protein; psbP	1.73811	0.797516	2.237e-05
cce_0805	putative ATP-NAD/AcoX kinase	0.428172	-1.22374	5.71177e-09
cce_0806	unknown; contains a rieske [2Fe-2S] region domain	0.638829	-0.646498	2.27682e-08
cce_0807	putative alpha-glucanotransferase	0.245922	-2.02373	0.000770057
cce_0809	unknown	1.79313	0.842479	3.04997e-06
cce_0810	hypothetical protein	0.664499	-0.589662	9.41817e-05
cce_0813	NUDIX hydrolase	0.761976	-0.392183	2.72331e-06
cce_0815	unknown	1.19977	0.262754	0.0150828
cce_0817	two component transcriptional regulator	1.56902	0.649867	1.62925e-07
cce_0819	conserved hypothetical protein	1.25754	0.330599	0.00592748
cce_0820	unknown	1.38643	0.471379	0.000263154
cce_0821	unknown	0.852489	-0.230247	0.0151228
cce_0822	unknown; contains a DRTGG domain	0.83302	-0.263577	0.00793049
cce_0823	unknown	0.642493	-0.638246	1.20096e-06
cce_0824	transposase	0.388212	-1.36508	0.00186236
cce_0825	probable sulfate transporter	0.0327136	-4.93397	1.46374e-09
cce_0826	unknown	0.533212	-0.907218	8.3756e-07
cce_0827	hypothetical protein	0.484904	-1.04423	0.000319918
cce_0828	unknown	1.48567	0.571117	4.24226e-07
cce_0829	anthranilate phosphoribosyltransferase; trpD	1.54704	0.629506	5.57263e-07
cce_0830	hypothetical protein	0.434618	-1.20218	0.000163156
cce_0831	naphthoate synthase; menB	1.54694	0.62942	7.86265e-07
cce_0833	hypothetical protein; contains a methyltransferase type 12 domain	1.35085	0.433865	0.000660738
cce_0834	exopolysaccharide synthesis protein; exoD1	1.37939	0.464025	0.00178622
cce_0838	unknown	1.43451	0.520561	0.0108307
cce_0840	unknown	0.542045	-0.883514	1.09956e-11
cce_0842	putative nicotinamide nucleotide transhydrogenase, subunit alpha 2 (A2); pntA-2	1.1573	0.210759	0.00406972
cce_0843	putative nicotinamide nucleotide transhydrogenase, subunit alpha 1 (A1); pntA-1	1.17211	0.229109	0.00277665
cce_0844	molybdenum-pterin binding protein; mop	0.411285	-1.28179	4.65674e-10
cce_0845	hypothetical protein	1.55129	0.633472	0.027962
cce_0846	cation-transporting ATPase, E1-E2 ATPase	1.32499	0.405987	1.75375e-05
cce_0847	molybdenum ABC transporter, periplasmic binding protein; modA	0.648826	-0.624096	1.35491e-10
cce_0848	hypothetical protein	0.304815	-1.71399	1.87004e-08
cce_0849	hypothetical protein	0.36481	-1.45478	1.53004e-06
cce_0850	hypothetical protein; contains an amidohydrolase 2 domain	0.240381	-2.05661	4.74913e-08
cce_0852	hypothetical protein; contains DUF6, transmembrane	0.457862	-1.12701	0.000889532
cce_0853	unknown; contains a phosphoribosyltransferase domain	1.14349	0.19344	0.000896304
cce_0854	hypothetical protein	0.105062	-3.25068	3.16532e-09
cce_0855	DUF541-containing protein	0.73233	-0.449435	0.000564284
cce_0857	hypothetical protein	0.67418	-0.568794	0.000226886
cce_0858	hypothetical protein	0.489087	-1.03184	9.40133e-05
cce_0859	hypothetical protein	0.492654	-1.02135	1.86592e-08
cce_0860	photosystem II 10 kD phosphoprotein; psbH	0.702947	-0.508511	1.55919e-08
cce_0862	unknown	1.40366	0.489195	0.000739076
cce_0863	Na+/alanine symporter	0.823616	-0.279957	0.0109321
cce_0864	hypothetical protein; contains DUF820	0.629288	-0.668209	3.20788e-05
cce_0865	hypothetical protein	0.763209	-0.389849	0.0134924
cce_0866	hypothetical protein; contains a PilT protein, N-terminal domain	0.653714	-0.613268	7.23674e-06
cce_0867	hypothetical protein	1.15303	0.205424	0.0499006
cce_0869	unknown	0.582283	-0.780208	7.87896e-05
cce_0870	hypothetical protein; contains a secretion protein HlyD domain	0.644392	-0.633989	1.63461e-06
cce_0873	hypothetical protein	87.8446	6.45688	9.13882e-15
cce_0875	group 1 sigma-70 RNA polymerase sigma factor A; sigA	1.34824	0.431074	0.000319778
cce_0876	hypothetical protein; contains an acid phosphatase/vanadium-dependent haloperoxidase domain	3.0718	1.61908	2.28801e-10
cce_0877	geranylgeranyl pyrophosphate synthase; crtE	2.68632	1.42563	6.05051e-08
cce_0878	coenzyme A biosynthesis protein	1.61015	0.687191	1.4885e-10
cce_0879	hypothetical protein	1.97732	0.983545	1.07117e-12
cce_0880	hypothetical protein; contains a transposase, IS605 OrfB domain	1.51702	0.601245	5.08755e-05
cce_0881	unknown; contains DUF29	1.1643	0.219467	0.00694155
cce_0884	phosphate ABC transporter, permease protein; pstA1	1.9987	0.999059	6.9797e-07
cce_0885	phosphate ABC transporter, permease protein; pstC1	2.17413	1.12044	0.000268267
cce_0889	conserved hypothetical protein	0.807059	-0.309254	0.0197095
cce_0891	unknown; contains an outer membrane efflux protein domain	3.09666	1.63071	7.50959e-09
cce_0892	probable ferredoxin	1.42219	0.508117	0.000171428
cce_0893	photosystem II reaction center M protein; psbM	1.25717	0.330182	0.00112476
cce_0894	DUF28-containing protein	1.4397	0.525769	7.34472e-06
cce_0895	hypothetical protein; contains helicase, C-terminal, Type III restriction enzyme, res subunit and DEAD/DEAH box helicase, N-terminal domains	0.632611	-0.660609	5.96871e-06
cce_0896	DUF360-containing protein	0.835343	-0.25956	0.00725565
cce_0898	hypothetical protein	0.410968	-1.2829	1.23566e-05
cce_0899	hypothetical protein	0.751823	-0.411536	0.0238886
cce_0900	hypothetical protein	0.412716	-1.27678	2.69009e-06
cce_0902	carbamoyl phosphate synthase small subunit; carA	0.714566	-0.484861	1.92785e-09
cce_0903	hypothetical protein	0.742955	-0.428653	0.00214244
cce_0904	unknown; contains a Homeodomain-like domain	1.91723	0.939027	1.35106e-06
cce_0905	rfrA family pentapeptide repeat	1.60825	0.685495	0.00649149
cce_0906	hypothetical protein	4.36438	2.12578	8.0145e-11
cce_0907	unknown	4.39534	2.13597	2.18866e-13
cce_0908	hypothetical protein; contains a Lambda repressor-like, DNA-binding domain	0.738982	-0.43639	3.31799e-06
cce_0910	ATP-binding protein of ABC transporter	1.36437	0.448238	0.0103258
cce_0911	unknown	0.922304	-0.116686	0.0222071
cce_0913	putative peptidase	1.7487	0.806284	0.000600261
cce_0914	hemolysin A; tly	0.673543	-0.570157	1.08879e-05
cce_0916	cation efflux system protein	0.733654	-0.446829	0.000570065
cce_0917	hypothetical protein; contains DUF820	0.717298	-0.479355	0.000645368
cce_0918	hypothetical protein	0.542757	-0.881622	0.00391271
cce_0920	phycobilisome core-membrane linker polypeptide; apcE	3.74609	1.90539	6.82845e-10
cce_0923	MRP protein-like protein	0.689198	-0.53701	2.3059e-05
cce_0925	hypothetical protein	0.736493	-0.441256	0.000262367
cce_0927	seryl-tRNA synthetase; serS	2.28035	1.18925	7.9405e-09
cce_0928	hypothetical protein; contains a GCN5-related N-acetyltransferase domain	0.623691	-0.681096	0.0312919
cce_0929	hypothetical protein	1.7487	0.806284	0.000600261
cce_0931	hypothetical protein	1.7487	0.806284	0.000600261
cce_0937	hypothetical protein	0.675756	-0.565425	0.00131332
cce_0939	putative HAD-superfamily hydrolase, subfamily IA, variant 3; gph	1.31582	0.395964	4.78223e-05
cce_0940	aspartate 1-decarboxylase; panD	1.76671	0.821067	8.97279e-08
cce_0942	probable permease protein of sugar ABC transporter, membrane component	1.18487	0.244723	9.21962e-05
cce_0943	probable permease protein of sugar ABC transporter, membrane component	1.79494	0.843936	6.05735e-05
cce_0944	putative peptidase S13, D-Ala-D-Ala carboxypeptidase C	1.66275	0.733572	4.27189e-08
cce_0945	unknown	1.95479	0.967013	5.41767e-06
cce_0947	unknown; contains DUF820	1.23374	0.303041	0.00365882
cce_0948	ATP-binding protein of amino acid ABC transporter	1.27429	0.349695	0.00028082
cce_0949	methionyl-tRNA formyltransferase; fmt	1.6597	0.730924	0.000652763
cce_0951	hydrogenase accessory protein; hupE	1.53903	0.622018	8.67857e-07
cce_0952	hypothetical protein	1.29762	0.375863	0.0457302
cce_0955	hypothetical protein; contains a phage Gp37Gp68 domain	0.736714	-0.440823	0.00156115
cce_0956	putative DNA-methyltransferase	0.360603	-1.47152	9.97759e-07
cce_0957	riboflavin biosynthesis protein; ribF	0.841642	-0.248721	0.0225965
cce_0958	putative peptidase M4, thermolysin	1.51797	0.602139	0.000345528
cce_0959	hypothetical protein	1.69327	0.759815	8.04459e-06
cce_0960	unknown	1.43492	0.520966	0.0122831
cce_0961	hypothetical protein	1.46128	0.54723	0.00146798
cce_0962	hypothetical protein; contains a glycosyl transferase, family 2 domain	1.90159	0.92721	2.10743e-06
cce_0966	putative GHMP kinase, LmbP protein; lmbP	1.29779	0.376056	0.00342392
cce_0967	hypothetical protein; contains a recombinase domain	0.659766	-0.599973	0.000811155
cce_0968	conserved hypothetical protein	0.624952	-0.678182	0.0127571
cce_0969	two-component sensor histidine kinase	0.271643	-1.88022	2.60676e-07
cce_0970	two-component transcription regulator	0.0801824	-3.64057	2.43438e-12
cce_0971	probable 4Fe-4S ferredoxin, iron-sulfur binding	0.818294	-0.289309	3.2994e-05
cce_0972	thioredoxin; trxA1	1.53891	0.621906	1.99507e-08
cce_0973	glycerol kinase; glpK	1.74914	0.806646	7.91889e-08
cce_0974	transcriptional Regulator, TetR family	1.57584	0.656124	1.70844e-06
cce_0975	unknown	1.40199	0.487476	5.60552e-07
cce_0976	putative CocE/NonD hydrolase	1.93936	0.955581	1.23104e-06
cce_0979	hypothetical protein	0.270199	-1.8879	6.73799e-06
cce_0980	hypothetical protein	1.16506	0.220404	0.0205779
cce_0982	hypothetical protein	0.390231	-1.3576	9.3344e-05
cce_0984	hypothetical protein; contains DUF172	0.438039	-1.19087	4.1016e-08
cce_0985	hypothetical protein; contains DUF820	0.288985	-1.79093	5.21762e-07
cce_0986	unknown; contains a methyltransferase type 11 domain	1.64922	0.72178	7.88282e-05
cce_0988	probable Haloacid dehalogenase-like hydrolase, type 3	1.42367	0.50961	0.000558176
cce_0989	photosystem I P700 chlorophyll a apoprotein subunit Ia; psaA	2.7471	1.45791	4.75541e-09
cce_0990	photosystem I P700 chlorophyll a apoprotein subunit Ib; psaB	3.80957	1.92963	1.04381e-10
cce_0991	permease protein of ABC transporter	2.57039	1.36199	0.002746
cce_0992	conserved hypothetical protein	1.77439	0.827322	1.9876e-05
cce_0993	hypothetical protein	0.618856	-0.692324	0.000773926
cce_0994	ferredoxin-NADP oxidoreductase; petH	0.593489	-0.752708	4.73702e-10
cce_0996	unknown	0.664943	-0.588698	6.49219e-06
cce_0997	glutamate dehydrogenase; gdhA	4.0533	2.0191	2.07193e-13
cce_0999	photosystem I reaction center subunit X; psaK2	0.860196	-0.217263	0.010816
cce_1002	hypothetical protein	0.737538	-0.439211	0.0436473
cce_1003	UDP-glucose-beta-D-glucan glucosyltransferase	0.634845	-0.655523	0.000812338
cce_1004	cysteine desulphurase; sufS	1.19511	0.257147	0.00340726
cce_1005	putative iron-sulfur assembly protein; sufD	1.56187	0.643271	1.17414e-05
cce_1006	unknown; contains a FAD linked oxidase, N-terminal domain	1.70138	0.766709	4.15612e-07
cce_1009	unknown	0.576692	-0.794127	1.99522e-11
cce_1010	cation-transporting ATPase	0.867359	-0.205298	0.0130545
cce_1011	hypothetical protein	0.671811	-0.573872	0.00576449
cce_1012	unknown	1.23099	0.299819	0.000139201
cce_1014	1-acyl-sn-glycerol-3-phosphate acyltransferase; plsC	0.898647	-0.154174	0.0113464
cce_1015	hypothetical protein	1.7487	0.806284	0.000600261
cce_1016	ribonuclease D; rnd	0.680952	-0.554374	1.6741e-09
cce_1017	NifU-like protein	0.791837	-0.336725	1.95802e-07
cce_1018	putative 2-phosphosulfolactate phosphatase	1.17814	0.236508	0.0208506
cce_1019	glycosyl transferase, group 1	1.44485	0.530917	1.55922e-06
cce_1022	alginate O-acetylation protein / membrane bound O-acyl transferase, MBOAT	1.48504	0.570502	0.00402074
cce_1024	cytochrome P-450 like protein	1.7487	0.806284	0.000600261
cce_1025	AMP-dependent synthetase and ligase/probable acyl-CoA synthase	1.72319	0.785084	0.000431162
cce_1028	AMP-dependent synthetase and ligase/probable acyl-CoA synthase	1.44588	0.531953	0.00662461
cce_1029	aminotransferase, class I and II	1.56072	0.642208	2.48834e-08
cce_1030	thioredoxin; trxA3	1.10487	0.143878	0.0278274
cce_1031	putative PspA/IM30	1.69244	0.7591	3.98776e-08
cce_1032	tyrosyl tRNA synthetase; tyrS	1.89215	0.92003	9.21158e-08
cce_1033	hypothetical protein	0.779178	-0.359975	0.000472288
cce_1034	unknown; contains a Ferritin/ribonucleotide reductase-like domain	0.47159	-1.0844	1.84976e-11
cce_1035	putative Iron permease FTR1	1.30731	0.386596	7.27912e-05
cce_1036	unknown	1.24146	0.312035	0.000673605
cce_1037	unknown	1.24439	0.315435	0.000323887
cce_1040	conserved hypothetical protein	1.3336	0.415327	0.00122167
cce_1041	hypothetical protein; contains DUF323	5.09827	2.35001	6.61078e-13
cce_1042	putative UCP018005	3.73718	1.90195	7.74706e-10
cce_1044	hypothetical protein	1.76303	0.818057	6.1792e-09
cce_1045	unknown	4.03294	2.01183	1.968e-09
cce_1046	unknown	4.84845	2.27752	5.33146e-10
cce_1047	hypothetical protein	0.304749	-1.71431	2.8574e-06
cce_1048	hypothetical protein; contains a Mo-dependent nitrogenase, C-terminal domain	0.590314	-0.760446	0.0110668
cce_1050	conserved hypothetical protein	0.331662	-1.59221	6.62253e-11
cce_1051	hypothetical protein; contains DUF820	0.729012	-0.455986	0.0031196
cce_1052	putative isochorismatase hydrolase	1.46537	0.551261	3.12503e-07
cce_1053	conserved hypothetical protein	1.33168	0.413244	0.000415691
cce_1055	hypothetical protein	1.99056	0.993175	4.63094e-07
cce_1057	putative L-asparaginase II	0.811877	-0.300666	0.0120605
cce_1058	DUF1230-containing protein	0.758653	-0.398488	9.95789e-06
cce_1059	putative Iojap-related protein	0.510587	-0.969771	2.46381e-05
cce_1061	probable cytosine-specific DNA methyltransferase	0.639773	-0.644368	0.0316904
cce_1062	putative YrdC-like RNA-binding protein	10.4745	3.38882	8.52255e-11
cce_1065	hypothetical protein	0.255257	-1.96998	0.000417254
cce_1066	hypothetical protein	0.203586	-2.29629	0.00010025
cce_1067	unknown	1.56955	0.650354	3.33567e-06
cce_1069	hypothetical protein	1.16132	0.215767	0.0234161
cce_1070	hypothetical protein	0.608017	-0.717816	9.26154e-05
cce_1071	hypothetical protein	0.184216	-2.44053	1.96732e-07
cce_1075	hypothetical protein; contains a WD-40 repeat and peptidase C14, caspase catalytic subunit p20 domain	1.61216	0.688991	5.56405e-06
cce_1076	hypothetical protein; contains a GUN4-like domain and a Peptidase, trypsin-like serine and cysteine domain	1.58123	0.661046	5.8478e-07
cce_1077	hypothetical protein	0.795827	-0.329473	0.000198763
cce_1078	GTP cyclohydrolase II / 3,4-dihydroxy-2-butanone 4-phosphate synthase; ribA/ribB	0.859119	-0.21907	0.00785149
cce_1079	hypothetical protein; contains UPF0150	1.46333	0.549257	7.05602e-06
cce_1080	unknown; contains a metallophosphoesterase domain	1.10049	0.138145	0.0111182
cce_1081	unknown; contains a TPR-like helical domain	0.579309	-0.787595	1.18454e-09
cce_1082	hypothetical protein; contains DUF820	1.24025	0.310626	0.0070828
cce_1083	unknown	0.574128	-0.800555	7.04262e-05
cce_1085	hypothetical protein; contains DUF102	0.352858	-1.50284	3.64165e-07
cce_1086	probable RNA-directed DNA polymerase	0.653691	-0.613318	0.00031536
cce_1088	hypothetical protein; contains DUF132	0.730777	-0.452498	0.00622348
cce_1091	DUF360-containing protein	1.11009	0.150681	0.011487
cce_1093	hypothetical protein; contains a TROVE domain	1.5971	0.675452	0.000201558
cce_1094	hypothetical protein; contains DUF29	0.630658	-0.66507	0.000320287
cce_1095	conserved hypothetical protein	0.720549	-0.472831	0.00487667
cce_1097	hypothetical protein	0.707863	-0.498459	0.00364051
cce_1102	putative helicase	1.7487	0.806284	0.000600261
cce_1103	unknown	1.2113	0.276556	0.022161
cce_1107	cytochrome c family protein	0.872452	-0.196853	0.0047072
cce_1108	putative LytB protein	1.56183	0.643241	1.13262e-05
cce_1109	unknown; contains DUF820	1.61493	0.691474	6.49601e-07
cce_1111	hypothetical protein	1.46082	0.546775	0.0162626
cce_1114	unknown	0.831442	-0.266313	0.0327937
cce_1116	putative biopolymer transport protein; exbB1	0.910058	-0.13597	0.023431
cce_1117	probable proteinase inhibitor I4, serpin	0.651177	-0.618879	3.30077e-06
cce_1118	hypothetical protein; contains a Rhodanese-like domain	0.679816	-0.556784	2.13183e-08
cce_1119	hypothetical protein	1.7487	0.806284	0.000600261
cce_1120	putative phytase	1.53718	0.620285	9.91935e-09
cce_1121	aspartate aminotransferase; aspC2	1.25985	0.333251	0.00415428
cce_1122	hypothetical protein	0.644406	-0.633959	0.000127961
cce_1123	hypothetical protein	0.407513	-1.29508	6.49112e-08
cce_1126	unknown; contains Lambda repressor-like, DNA-binding and DUF 955 domains	1.27345	0.348745	0.00500199
cce_1128	unknown	0.194637	-2.36114	1.44657e-11
cce_1129	hypothetical protein	0.569641	-0.811876	0.000182015
cce_1130	hypothetical protein	1.16445	0.219643	0.0127943
cce_1131	unknown; contains a WD-40 repeat and a protein kinase	1.44927	0.53533	0.00485763
cce_1132	hypothetical protein	0.847232	-0.239171	0.00426728
cce_1133	probable long-chain-fatty-acid CoA ligase; fadD	1.64711	0.71994	1.00442e-05
cce_1134	unknown	1.91406	0.936635	1.26811e-08
cce_1136	GTP-dependent translation factor; ychF	1.15133	0.203301	0.027515
cce_1137	putative diguanylate cyclase/phosphodiesterase	1.20042	0.263539	0.0394983
cce_1139	putative phosphate transporter, phosphate binding protein	0.647639	-0.626738	1.88635e-07
cce_1140	hypothetical protein	0.359353	-1.47653	0.00080137
cce_1141	hypothetical protein	0.338174	-1.56416	2.63166e-07
cce_1142	hypothetical protein	0.269696	-1.8906	8.45949e-09
cce_1144	hypothetical protein	0.463125	-1.11053	2.91346e-06
cce_1145	hypothetical protein; contains DUF29	0.223123	-2.16409	2.57544e-08
cce_1147	hypothetical protein; contains DUF820	0.46662	-1.09968	0.000392781
cce_1149	hypothetical protein	0.739964	-0.434473	0.0363484
cce_1150	WD-repeat protein	1.24512	0.316281	0.0163827
cce_1153	esterase	0.47342	-1.07881	2.45413e-06
cce_1154	putative AB-hydrolase YheT	1.64479	0.7179	0.0441109
cce_1156	hypothetical protein; contains DUF490	1.44914	0.535194	0.00242664
cce_1157	hypothetical protein; contains DUF6, transmembrane	0.533416	-0.906666	2.72032e-07
cce_1158	unknown; contains tetratricopeptide repeat domains	1.92594	0.945561	9.92868e-06
cce_1160	putative biopolymer transport protein, ExbD/TolR family	1.7487	0.806284	0.000600261
cce_1161	putative biopolymer transport protein, ExbD/TolR family	1.50789	0.592527	0.00308203
cce_1162	conserved hypothetical protein	1.7487	0.806284	0.000600261
cce_1163	phosphate binding protein; ptsS3	4.11918	2.04236	1.30828e-09
cce_1165	phosphate ABC transporter, permease protein; pstA2	1.18481	0.244657	0.00348083
cce_1170	hypothetical protein; contains a glycosyl transferase, family 2 domain	0.684944	-0.545942	3.91726e-05
cce_1172	unknown; contains a winged helix repressor DNA-binding and a Pleckstrin/ G-protein domain, interacting region domains	0.704126	-0.506094	0.00141348
cce_1173	unknown	1.28656	0.363523	0.00211763
cce_1174	putative thymidylate kinase; tmk	0.645124	-0.632351	6.37584e-07
cce_1175	Membrane-associated proteins in eicosanoid and glutathione metabolism (MAPEG) family	0.695277	-0.524341	3.50365e-05
cce_1176	NADH dehydrogenase subunit 2; ndhB	0.850457	-0.23369	4.31644e-05
cce_1178	hypothetical protein	1.65634	0.727996	1.39271e-07
cce_1179	hypothetical protein; contains an S-layer homology (SLH) domain	1.72491	0.786522	8.59731e-07
cce_1180	unknown; contains a cupredoxin domain	1.86846	0.901846	7.26441e-11
cce_1181	methylthioadenosine phosphorylase	2.19065	1.13136	1.34929e-09
cce_1182	hypothetical protein	2.7015	1.43376	1.42557e-09
cce_1183	conserved hypothetical protein	0.684832	-0.546178	0.000893603
cce_1186	two-component hybrid sensor and regulator	0.676056	-0.564784	0.00304073
cce_1187	cobalamin biosynthesis protein/P47K; cobW	1.53227	0.615674	0.000120377
cce_1189	ion transport protein	1.54297	0.625706	0.000603658
cce_1190	glyoxalase II	1.35469	0.437963	0.000255233
cce_1191	hypothetical protein	0.50752	-0.978463	0.000254831
cce_1192	hypothetical protein; contains winged helix repressor DNA-binding and a helix-turn-helix, type 11 domains	1.63237	0.706965	0.000801073
cce_1193	hypothetical protein	1.69536	0.761589	0.0211157
cce_1196	putative CRISPR-associated negative autoregulator	2.19675	1.13537	3.37816e-07
cce_1197	hypothetical protein	1.72743	0.788624	1.05553e-07
cce_1198	hypothetical protein; contains DUF48 and CRISPR-associated protein Cas4 domains	1.64312	0.716441	1.64925e-08
cce_1199	DUF196-containing protein	2.16452	1.11404	3.08657e-10
cce_1200	hypothetical protein	1.7487	0.806284	0.000600261
cce_1201	hypothetical protein; contains DUF29	0.55777	-0.842258	3.26413e-05
cce_1205	Sec-independent protein translocase protein; tatC	1.19243	0.2539	0.0158108
cce_1206	hypothetical protein; contains PAS, GGDEF, and GAF domains	2.27603	1.18652	2.32738e-06
cce_1207	sucrose phosphate synthase; sps	1.28334	0.359907	0.000731293
cce_1211	amidophosphoribosyl transferase	1.74189	0.800657	1.29232e-05
cce_1212	hypothetical protein	257.22	8.00686	2.98331e-16
cce_1213	C-5 cytosine-specific DNA methylase	2.40145	1.2639	7.9183e-07
cce_1214	nitrate reductase; narB	0.61106	-0.710614	0.00115888
cce_1215	unknown	0.662824	-0.593303	5.0818e-06
cce_1216	unknown; contains DUF820	0.770813	-0.375547	0.00506241
cce_1217	hypothetical protein	0.341208	-1.55128	6.79795e-06
cce_1218	hypothetical protein; contains UPF0150	0.690785	-0.533691	5.13093e-06
cce_1219	hypothetical protein; contains aYcfA domain	0.824159	-0.279005	0.036805
cce_1220	hypothetical protein	0.307293	-1.70232	0.0019939
cce_1222	high-affinity nitrate/nitrite bispecific transporter; nrtP	0.271991	-1.87837	0.00105138
cce_1224	hypothetical protein; contains DUF172	1.13679	0.184965	0.0154599
cce_1226	putative ATPase	1.47642	0.5621	0.0118414
cce_1228	hypothetical protein	0.439872	-1.18484	1.03298e-05
cce_1229	unknown	0.195275	-2.35642	3.72262e-08
cce_1231	unknown	0.755206	-0.405058	0.00062241
cce_1232	putative ABC transporter permease protein, ABC-2	0.795605	-0.329876	0.0123841
cce_1233	ABC transporter ATP binding subunit	0.763213	-0.389843	6.19568e-07
cce_1234	NAD-dependent epimerase/dehydratase	0.858768	-0.21966	0.00202396
cce_1235	DNA topoisomerase I; topA1	1.23958	0.309846	2.01367e-05
cce_1236	unknown; contains DUF820	0.791041	-0.338175	3.90185e-05
cce_1237	serine/threonine protein kinase	1.69304	0.759617	0.000414786
cce_1238	conserved hypothetical protein	1.45411	0.540135	1.35449e-05
cce_1239	hypothetical protein; contains TPR_1 tetratricopeptide repeat domains	1.43622	0.522278	6.20818e-07
cce_1240	Mn2+ ABC transporter, permease protein; mntB	1.14984	0.201434	0.01943
cce_1241	Mn2+ ABC transporter, ATP-binding protein; mntA	1.56987	0.650649	2.47119e-05
cce_1242	Mn2+ ABC transporter, periplasmic binding protein; mntC	1.32489	0.40587	0.000668834
cce_1243	unknown	0.774159	-0.369298	0.00816048
cce_1244	unknown; contains a GGDEF domain and EAL domain	0.464883	-1.10506	0.00155399
cce_1245	putative short-chain dehydrogenase/reductase (SDR) superfamily	0.692837	-0.529412	3.59456e-07
cce_1246	putative permease YjgP/YjgQ	0.835806	-0.25876	0.0187748
cce_1247	putative chloride channel protein, CIC family	0.817763	-0.290245	0.00685353
cce_1248	hypothetical protein; contains a Ion transport 2, bacterial domain	1.37637	0.460867	0.00181282
cce_1249	unknown; contains DUF1400	3.98604	1.99495	1.20763e-08
cce_1251	unknown	3.45435	1.78841	1.08851e-13
cce_1252	unknown; contains DUF1214 and DUF1254	5.01095	2.32509	2.3196e-11
cce_1253	sulfatase	1.99672	0.997629	4.89454e-09
cce_1254	hypothetical protein	3.10182	1.63311	6.69897e-09
cce_1256	unknown	0.588162	-0.765714	3.87764e-12
cce_1257	unknown	0.706134	-0.501986	0.000197743
cce_1258	unknown	0.484718	-1.04478	3.51642e-10
cce_1261	putative Tn7-like transposition protein D	0.544223	-0.877731	0.000325121
cce_1265	hypothetical protein	1.57429	0.654697	0.0056163
cce_1267	putative short-chain dehydrogenase/reductase (SDR) superfamily	1.1181	0.161054	0.0404241
cce_1268	endonuclease III; nth	1.29345	0.371226	0.00121853
cce_1269	hypothetical protein; contains UPF0118	1.81598	0.860749	0.00322942
cce_1270	cell division protein; ftsH1	1.59503	0.673585	1.91478e-08
cce_1272	rfrA family pentapeptide repeat	0.760364	-0.395237	0.00138557
cce_1274	putative cytidine/deoxycytidylate deaminase	0.661435	-0.596329	5.69971e-06
cce_1275	hypothetical protein	0.219516	-2.1876	6.23356e-06
cce_1276	hypothetical protein	0.778252	-0.36169	0.000114427
cce_1277	putative histone-like DNA-binding protein	1.18046	0.239353	0.0138802
cce_1278	DUF1611-containing protein	1.60035	0.678385	1.70689e-05
cce_1279	hypothetical protein	1.7487	0.806284	0.000600261
cce_1282	UPF0004-containing protein	1.55188	0.634014	7.64999e-07
cce_1283	unknown	1.20241	0.265925	0.0093821
cce_1285	putative ribonuclease BN	1.07032	0.0980475	0.0427143
cce_1287	unknown; contains an aldo/keto reductase domain	2.19189	1.13217	1.13224e-08
cce_1288	putative lipoxygenase	2.49203	1.31732	9.45356e-07
cce_1289	photosystem I reaction center subunit IX; psaJ	2.2351	1.16034	9.68491e-06
cce_1291	conserved hypothetical protein	1.78585	0.836608	3.70542e-05
cce_1292	hypothetical protein; contains CBS, DUF21, and transporter-associated region domains	1.38036	0.465043	0.000391317
cce_1293	unknown	1.12786	0.173593	0.0247918
cce_1294	conserved hypothetical protein	0.820522	-0.285386	0.000893417
cce_1295	unknown	0.260211	-1.94224	6.75916e-08
cce_1297	hypothetical protein; contains a GTPase EngC domain	0.8068	-0.309717	0.0300224
cce_1298	conserved hypothetical protein	0.844404	-0.243994	0.00031292
cce_1299	heat shock protein Hsp40; dnaJ1	0.817983	-0.289858	0.00125995
cce_1300	unknown	0.798928	-0.323863	8.18668e-05
cce_1301	unknown; contains TPR_1 tetratricopeptide repeat domains	0.585001	-0.773489	2.84653e-07
cce_1303	photosystem II protein J; psbJ	1.5229	0.60682	5.14767e-08
cce_1304	photosystem II protein L; psbL	1.50751	0.592168	2.51983e-05
cce_1305	photosystem II cytochrome b559 beta subunit; psbF	1.59962	0.67773	2.01284e-07
cce_1307	photosystem II cytochrome b559 alpha subunit; psbE	1.62937	0.704317	8.6418e-09
cce_1308	probable photosystem II stability/assembly factor	2.13884	1.09683	6.22159e-09
cce_1309	rubredoxin; rub1	3.65729	1.87078	2.99323e-08
cce_1312	hypothetical protein; contains DUF124	0.396414	-1.33492	0.000172747
cce_1314	cell division protein; ftsZ	1.31659	0.396805	2.0138e-06
cce_1315	conserved hypothetical protein	2.06921	1.04908	6.54594e-09
cce_1316	unknown; contains an ankyrin domain	1.94213	0.957642	6.77506e-09
cce_1317	4-diphosphocytidyl-2-C-methyl-D-erythritol kinase; ispE	0.821432	-0.283788	8.13668e-05
cce_1318	phenylalanyl-tRNA synthetase alpha chain; pheS	1.45656	0.542567	2.76836e-07
cce_1319	hypothetical protein	0.486806	-1.03858	0.000265543
cce_1320	hypothetical protein	0.54108	-0.886087	1.12508e-06
cce_1321	phenylalanyl-tRNA synthetase beta subunit; pheT	0.668021	-0.582036	1.70397e-05
cce_1322	unknown; contains a YCII-related domain	0.835171	-0.259856	0.0224017
cce_1323	hypothetical protein	0.53257	-0.908958	0.00707012
cce_1324	hypothetical protein	1.7487	0.806284	0.000600261
cce_1325	hypothetical protein	1.49203	0.577277	0.00257606
cce_1327	hypothetical protein	0.436426	-1.19619	0.000505538
cce_1328	GTP-binding protein; hflX	0.853712	-0.228178	0.00238287
cce_1329	UPF0153-containing protein	0.749212	-0.416554	0.00284514
cce_1330	DUF561-containing protein	0.823082	-0.280893	0.000378677
cce_1332	hypothetical protein	0.591397	-0.757801	0.000642703
cce_1333	putative general substrate transporter, MFS family	0.925419	-0.111821	0.0254117
cce_1338	putative 23S rRNA methyltransferase/RumA	0.830403	-0.268117	0.0114106
cce_1339	unknown	0.802493	-0.31744	2.46381e-05
cce_1343	chaperonin; groES	2.16038	1.11128	7.31874e-08
cce_1345	ATP synthase gamma subunit-like protein	0.766218	-0.384174	1.30063e-07
cce_1347	hypothetical protein	0.656515	-0.607099	3.9676e-05
cce_1348	hypothetical protein	0.850455	-0.233693	0.0133898
cce_1349	undecaprenyl pyrophosphate synthetase; uppS2	1.4825	0.568036	4.50275e-05
cce_1350	hypothetical protein; contains DUF147	2.67828	1.42131	5.43262e-10
cce_1351	diaminopimelate decarboxylase; lysA	2.46008	1.2987	5.45582e-11
cce_1353	unknown; contains a SNF2-related helicase	1.13711	0.185375	0.038235
cce_1354	ribonucleoside-diphosphate reductase alpha subunit; nrdA	0.293324	-1.76943	2.978e-08
cce_1355	heat shock protein Hsp40; dnaJ3	1.25401	0.326551	0.0012093
cce_1359	putative creatininase	1.71041	0.774342	0.000376209
cce_1360	hypothetical protein	1.7487	0.806284	0.000600261
cce_1361	hypothetical protein	0.698025	-0.518649	2.03456e-06
cce_1362	hypothetical protein	0.733809	-0.446524	0.000619604
cce_1363	unknown; contains a single-stranded nucleic acid binding R3H domain	1.22374	0.291296	0.0179805
cce_1364	putative 60 kD inner membrane insertion protein	2.07784	1.05508	5.70112e-05
cce_1365	unknown	1.22362	0.291158	0.00561948
cce_1366	protein subunit of ribonuclease P; rnpA	1.26591	0.340173	1.26716e-05
cce_1367	50S ribosomal protein L34; rpl34	0.884314	-0.177369	0.0212916
cce_1369	unknown	2.24145	1.16444	4.70507e-12
cce_1370	putative extracellular solute-binding protein, family 3 precursor	0.785223	-0.348825	0.00129786
cce_1371	hypothetical protein; contains UPF0118	0.693013	-0.529046	5.2055e-06
cce_1372	carboxyl-terminal protease	0.639031	-0.646042	2.77335e-08
cce_1374	conserved hypothetical protein	0.804414	-0.31399	0.00775805
cce_1377	putative pterin-4-alpha-carbinolamine dehydratase; dcoH1	0.728205	-0.457583	0.000177451
cce_1378	unknown	0.299317	-1.74026	3.17961e-09
cce_1380	DUF1001-containing protein	2.1227	1.0859	1.61013e-07
cce_1381	hypothetical protein	0.904451	-0.144886	0.0104483
cce_1384	cytochrome b6-f complex subunit 4; petD	0.822339	-0.282195	1.57214e-05
cce_1385	hypothetical protein	1.73123	0.791793	0.000421447
cce_1386	putative TRAP dicarboxylate transporter, DctM subunit	1.26859	0.343231	0.00539929
cce_1388	heat-inducible transcriptional repressor; hrcA	0.704441	-0.50545	4.02427e-06
cce_1389	unknown; contains a Rhodanese-like domain	0.633718	-0.658087	1.81486e-05
cce_1390	hypothetical protein	1.31326	0.393153	0.0117397
cce_1391	50s ribosomal protein L21; rpl21	1.23534	0.304905	0.000177669
cce_1392	50S ribosomal protein L27; rpl27	0.892799	-0.163592	0.0263679
cce_1393	conserved hypothetical protein	0.794114	-0.332582	0.0196322
cce_1394	unknown	1.35095	0.433978	5.49618e-05
cce_1395	unknown; contains a glycosyl transferase, family 10 domain	1.70612	0.770716	3.30737e-05
cce_1396	hypothetical protein	0.728001	-0.457987	0.0437365
cce_1397	putative ABC transporter for sugars	1.18649	0.246694	7.25208e-05
cce_1398	hypothetical protein; contains GGDEF, EAL, and Histidine kinase HAMP region domains	0.787347	-0.344928	0.0458706
cce_1399	hypothetical protein	0.474814	-1.07457	0.000113752
cce_1402	hypothetical protein; contains a glycosyl transferase, family 39 domain	1.1847	0.244518	0.0259838
cce_1403	Na+/solute symporter	0.843085	-0.24625	5.6715e-06
cce_1404	unknown; contains DUF820	0.719744	-0.474445	0.000405779
cce_1406	DegT/DnrJ/EryC1/StrS aminotransferase family protein	1.10175	0.139802	0.0407128
cce_1409	unknown	0.927291	-0.108906	0.0489712
cce_1411	unknown; contains GGDEF and GAF domains	0.792244	-0.335983	0.0119313
cce_1412	two-component response regulator	0.524911	-0.929855	0.00462988
cce_1414	unknown	1.4079	0.493547	0.000108016
cce_1415	hypothetical protein	1.46595	0.551841	0.0261047
cce_1416	hypothetical protein	1.71282	0.776377	8.23208e-08
cce_1417	hypothetical protein	1.36364	0.44746	0.000303138
cce_1418	probable AMP-dependent synthetase and ligase	1.35061	0.433613	8.35398e-06
cce_1420	hypothetical protein; contains HesB/YadR/YfhF domains	1.75268	0.809563	0.0203178
cce_1421	putative type II thioesterase	1.36131	0.444993	0.00341928
cce_1423	transcriptional regulator	0.870234	-0.200524	0.000730364
cce_1424	hypothetical protein	0.122285	-3.03169	6.04939e-09
cce_1425	hypothetical protein; contains DUF820	0.499408	-1.00171	0.000281961
cce_1429	hypothetical protein; contains a DnaJ N-terminal four helical 'J' domain	1.81728	0.861779	1.97829e-06
cce_1430	unknown; contains a short-chain dehydrogenase/reductase SDR domain	0.832707	-0.264119	0.0397159
cce_1432	hypothetical protein	0.449279	-1.15432	1.13791e-07
cce_1433	hypothetical protein	0.819294	-0.287547	0.000202563
cce_1434	excinuclease ABC subunit C; uvrC	0.825489	-0.276679	0.0114418
cce_1437	hypothetical protein; contains a chrD domain	0.57284	-0.803797	5.96256e-05
cce_1438	hypothetical protein; contains polynucleotidyl transferase, Ribonuclease H fold and Transposase, IS4 domains	0.469489	-1.09084	1.42201e-06
cce_1440	hypothetical protein	0.759352	-0.397159	0.00189123
cce_1442	unknown	2.05096	1.0363	3.45701e-05
cce_1443	hypothetical protein	0.608374	-0.71697	0.0127898
cce_1445	putative dienelactone hydrolase	0.82219	-0.282456	0.0150906
cce_1446	hypothetical protein	0.79661	-0.328054	0.000181604
cce_1447	hypothetical protein	1.49081	0.5761	0.000173568
cce_1448	hypothetical protein; contains a TspO/MBR-related protein domain	1.56771	0.648656	7.86702e-07
cce_1449	unknown	1.44711	0.533178	1.06246e-05
cce_1453	hypothetical protein	0.771532	-0.374202	0.000144029
cce_1454	unknown	0.900845	-0.150649	0.0290027
cce_1456	putative alpha-glucosidase	0.690096	-0.535131	3.26542e-05
cce_1458	unknown; contains an alpha amylase catalytic subdomain	1.55805	0.639737	1.39414e-05
cce_1459	unknown	0.51433	-0.959233	2.1097e-08
cce_1460	hypothetical protein; contains an ankyrin domain	0.284962	-1.81116	5.23444e-06
cce_1461	unknown	0.587193	-0.768093	6.63349e-06
cce_1462	unknown	0.499171	-1.00239	3.05514e-09
cce_1463	unknown	0.378024	-1.40345	2.44249e-11
cce_1465	hypothetical protein	2.20614	1.14153	1.56088e-05
cce_1466	probable AMP-dependent synthetase and ligase	2.13147	1.09185	1.60042e-07
cce_1467	two-component sensor histidine kinase	1.8249	0.867814	3.90232e-07
cce_1468	putative lipopolysaccharide biosynthesis	1.32522	0.406227	0.000188065
cce_1469	unknown	1.43437	0.520416	0.000448337
cce_1470	ATP-binding protein of ABC transporter	1.26994	0.34476	0.00140028
cce_1471	putative ABC-2 type transporter	1.23948	0.309739	0.00195881
cce_1474	4-alpha-glucanotransferase; malQ	1.47207	0.557843	2.93528e-05
cce_1475	WD-repeat protein	1.20021	0.263288	0.00039622
cce_1476	hypothetical protein; contains DUF6, transmembrane	2.77371	1.47182	2.36537e-07
cce_1477	unknown	2.03318	1.02374	1.71466e-09
cce_1478	unknown	1.31014	0.38972	8.70332e-07
cce_1479	putative Phosphohistidine phosphatase SixA	1.85445	0.890994	2.07201e-08
cce_1480	putative holliday junction resolvase, YqgF family	0.764052	-0.388257	0.00133181
cce_1481	hypothetical protein	0.44449	-1.16978	7.52973e-07
cce_1482	conserved hypothetical protein	0.804131	-0.314498	0.0119888
cce_1483	hypothetical protein; contains a MscS Mechanosensitive ion channel domain	1.18249	0.241828	0.0146555
cce_1484	Mn2+/Zn2+ family ABC transporter, periplasmic binding protein	0.409402	-1.28841	0.000114333
cce_1486	Mn2+/Zn2+ family ABC transporter, permease protein	1.4865	0.571916	0.0457448
cce_1487	hypothetical protein; contains a WD40-like domain	1.7487	0.806284	0.000600261
cce_1488	hypothetical protein; contains a cobalamin (vitamin B12) biosynthesis domain, cobW domain	1.80111	0.848888	0.00036707
cce_1489	delta-aminolevulinic acid dehydratase; hemB3	1.89871	0.925017	3.74974e-06
cce_1490	hypothetical protein; contains a cobalamin (vitamin B12) biosynthesis domain, cobW domain	0.668238	-0.581566	0.0202748
cce_1491	hypothetical protein; contains a cobalamin (vitamin B12) biosynthesis domain, cobW domain	1.42157	0.507486	0.000944611
cce_1492	hypothetical protein	1.47798	0.563622	0.00672919
cce_1493	hypothetical protein; contains a phosphoesterase MJ0912 domain	2.13014	1.09095	2.0307e-08
cce_1494	hypothetical protein	1.4568	0.542807	0.00727608
cce_1496	hypothetical protein	1.7487	0.806284	0.000600261
cce_1497	hypothetical protein	0.810114	-0.303803	0.00855869
cce_1498	nitrogen assimilation regulatory protein	1.27276	0.347959	0.000342852
cce_1499	unknown	2.00773	1.00557	5.09371e-05
cce_1501	GTP cyclohydrolase I; folE2	2.50876	1.32697	6.54797e-08
cce_1503	ATP synthase F1, alpha subunit; atpA2	1.68133	0.749605	0.018152
cce_1504	unknown; contains aYcfA domain	1.42304	0.508977	0.00107388
cce_1505	hypothetical protein; contains UPF0150	1.57702	0.657197	0.000350921
cce_1506	putative ATP synthase F0, subunit B'	1.50415	0.588948	0.000276409
cce_1507	putative ATP synthase F0, C subunit	1.63367	0.708116	1.88412e-05
cce_1508	putative ATP synthase F0, subunit A	1.43785	0.523912	0.000106449
cce_1509	hypothetical protein	1.16773	0.223711	0.00515996
cce_1511	putative ATP synthase delta/epsilon subunit	1.3184	0.398789	5.10034e-07
cce_1513	unknown; contains an S-layer homology (SLH) domain	1.67961	0.748125	5.86966e-05
cce_1514	orotate phosphoribosyltransferase; pyrE	0.732634	-0.448836	0.000306331
cce_1515	hypothetical protein	1.7487	0.806284	0.000600261
cce_1517	hypothetical protein	1.38919	0.474247	0.000827936
cce_1518	hypothetical protein	1.76498	0.819655	1.73707e-06
cce_1520	two-component response regulator	0.685298	-0.545196	0.000320914
cce_1521	unknown; contains PAS, GGDEF, EAL, Response regulator receiver, CheY-like, and PAS fold-3 domains	1.54835	0.63073	8.3302e-08
cce_1522	gamma-glutamyltranspeptidase; ggt2	0.522838	-0.935563	9.48313e-06
cce_1523	unknown; contains a glyoxalase/bleomycin resistance protein/dioxygenase domain	0.318452	-1.65085	8.82176e-07
cce_1524	CHP02652-containing protein	0.317077	-1.6571	1.98922e-09
cce_1525	ferripyochelin binding protein; yrdA	1.25165	0.323828	1.80063e-06
cce_1528	conserved hypothetical protein	0.630131	-0.666277	2.51389e-09
cce_1529	hypothetical protein	0.745162	-0.424373	4.194e-06
cce_1531	putative cobalt ABC transporter permease protein; cbiQ3	0.886693	-0.173494	0.0214904
cce_1532	hypothetical protein	0.121725	-3.0383	2.40578e-05
cce_1533	CDP-diacylglycerol--glycerol-3-phosphate 3-phosphatidyltransferase; pgsA	0.840774	-0.25021	0.0146607
cce_1534	putative carotenoid isomerase	1.75678	0.81293	1.52174e-07
cce_1535	two-component sensor histidine kinase	0.754547	-0.406317	0.0137103
cce_1538	unknown; contains a glycosyl transferase, family 39 domain	0.837912	-0.255129	0.00950471
cce_1539	hypothetical protein; contains an acid phosphatase/vanadium-dependent haloperoxidase domain	0.760803	-0.394404	0.0106396
cce_1540	hypothetical protein	0.368186	-1.44149	2.94862e-06
cce_1543	putative CAB/ELIP/HLIP superfamily protein	0.459437	-1.12206	3.02507e-11
cce_1545	rfrA family pentapeptide repeat	0.656391	-0.607372	0.039931
cce_1546	hypothetical protein; contains DUF6, transmembrane	0.893133	-0.163053	0.0265678
cce_1547	conserved hypothetical protein	0.629925	-0.666749	5.6368e-08
cce_1551	unknown	0.640632	-0.642432	0.00170001
cce_1552	hypothetical protein	0.595637	-0.747495	0.000472208
cce_1556	putative sensor protein	1.30541	0.384506	0.000404326
cce_1557	rfrA family pentapeptide repeat	0.888956	-0.169816	0.00958803
cce_1558	putative phenazine biosynthesis PhzC/PhzF protein	1.41099	0.496703	7.01115e-05
cce_1559	TRNA (Guanine-N(2)-)-methyltransferase	0.413349	-1.27457	4.90367e-06
cce_1560	serine/threonine protein kinase	1.45626	0.542272	0.000300696
cce_1563	unknown	1.38623	0.471162	7.2467e-08
cce_1564	hypothetical protein	1.7487	0.806284	0.000600261
cce_1565	potassium channel, VIC family	0.492701	-1.02122	6.03538e-07
cce_1568	putative nonspecific acid phosphatase	1.20309	0.266748	0.00148869
cce_1569	probable sulfolipid sulfoquinovosyldiacylglycerol biosynthesis protein; sqdX	1.4489	0.534958	6.1991e-07
cce_1570	stationary-phase survival protein; surE1	0.618486	-0.693188	6.03023e-06
cce_1571	unknown	0.730369	-0.453304	0.000361115
cce_1572	hypothetical protein	0.0941548	-3.40882	8.33737e-08
cce_1573	hypothetical protein	0.0963079	-3.3762	9.27104e-09
cce_1574	hypothetical protein	0.219117	-2.19023	5.58419e-09
cce_1575	hypothetical protein	0.335281	-1.57656	6.06202e-07
cce_1576	hypothetical protein	0.349204	-1.51786	1.46937e-07
cce_1579	unknown; contains a fimbrial assembly domain	2.02508	1.01798	9.18848e-11
cce_1580	unknown	2.95976	1.56548	1.06997e-10
cce_1581	general secretion pathway protein D; gspD	2.34263	1.22813	1.73181e-09
cce_1582	unknown	0.322342	-1.63333	4.0542e-07
cce_1583	malonyl coenzyme A-acyl carrier protein transacylase; fabD	1.56982	0.650603	4.05805e-07
cce_1585	fatty acid/phospholipid synthesis protein; plsX	1.12103	0.164824	0.00130386
cce_1586	methionine aminopeptidase; map1	1.88748	0.91646	7.17269e-15
cce_1588	glutathione dependent formaldehyde dehydrogenase	0.856178	-0.224017	0.00718118
cce_1589	unknown; contains a transglutaminase-like domain	0.64394	-0.635002	0.000136736
cce_1590	hypothetical protein	0.487578	-1.03629	1.38009e-11
cce_1591	hypothetical protein; contains DUF820	0.592714	-0.754593	1.01255e-05
cce_1592	hypothetical protein; contains a DNA polymerase, beta-like region domain	0.634838	-0.65554	0.00241526
cce_1593	hypothetical protein; contains DUF86	0.488082	-1.0348	6.66779e-05
cce_1594	hypothetical protein	0.236969	-2.07723	1.477e-07
cce_1595	bifunctional proline dehydrogenase/delta-1-pyrroline-5-carboxylate dehydrogenase; putA	2.58119	1.36804	3.0361e-10
cce_1597	hypothetical protein	0.728902	-0.456203	0.00320907
cce_1598	molybdenum cofactor biosynthesis protein B; moaB2	1.36141	0.445104	0.00010134
cce_1599	photosystem II 13 kD protein; psb28	1.35999	0.443595	0.000128342
cce_1601	D-lactate dehydrogenase	0.576323	-0.79505	0.02757
cce_1602	acetyltransferase	0.370815	-1.43123	0.000609571
cce_1603	glycogen phosphorylase; glgP3	1.78107	0.832747	6.24954e-08
cce_1604	pyruvate kinase; pykF3	1.49767	0.582718	1.46281e-08
cce_1606	2Fe-2S ferredoxin; petF4	1.22247	0.289801	0.00178251
cce_1607	2Fe-2S ferredoxin; petF3	1.24287	0.313681	0.00608755
cce_1608	oxidoreductase, putative biliverdin reductase; bvdR	1.37398	0.45836	0.00113454
cce_1609	unknown; contains DUF608	0.903907	-0.145753	0.0449471
cce_1610	unknown	2.04938	1.03519	1.03751e-06
cce_1611	putative carbohydrate kinase, PfkB family	1.22844	0.296829	0.000275468
cce_1612	probable cyclic nucleotide-binding protein	0.533486	-0.906478	1.34451e-13
cce_1614	branched-chain amino acid aminotransferase; ilvE	1.10842	0.148502	0.0230611
cce_1616	hypothetical protein; contains a glycosyl transferase, family 39 domain	0.877621	-0.18833	0.00787013
cce_1617	unknown; contains DUF1400	0.744468	-0.425718	5.75697e-06
cce_1622	conserved hypothetical protein	0.733224	-0.447675	7.13943e-05
cce_1623	transcription termination factor, N utilization substance protein B; nusB	0.710066	-0.493975	0.000364072
cce_1625	hypothetical protein	1.74495	0.803186	0.000614865
cce_1630	two component transcriptional regulator, winged helix family	0.765633	-0.385276	0.000392392
cce_1631	probable cell envelope-related transcriptional attenuator precursor	1.29189	0.369487	0.00015025
cce_1632	PEP/pyruvate-binding protein	1.63156	0.706248	0.00371911
cce_1633	unknown; contains a TolB, C-terminal domain	1.17978	0.238518	0.00321303
cce_1634	conserved hypothetical protein	0.768122	-0.380593	0.00159987
cce_1638	aldo/keto reductase	1.48875	0.574104	0.000182654
cce_1642	probable auxin efflux carrier	0.528734	-0.919387	1.42803e-11
cce_1643	probable nitroreductase	0.845747	-0.241702	0.0296579
cce_1644	conserved hypothetical protein	1.87604	0.907694	2.07054e-08
cce_1645	putative cobalamin-5-phosphate synthase; cobS	0.434049	-1.20407	1.18439e-06
cce_1646	hypothetical protein; contains a peptidase, archaeal and bacterial C-terminal domain	0.595866	-0.74694	1.19677e-07
cce_1647	putative ATPase	1.30968	0.38922	9.0968e-06
cce_1648	unknown	1.52621	0.609953	8.26048e-06
cce_1649	unknown; contains a nuclear transport factor 2 domain	1.49606	0.581164	7.95906e-06
cce_1652	hypothetical protein	1.7487	0.806284	0.000600261
cce_1655	unknown	0.570702	-0.80919	3.73558e-05
cce_1656	hypothetical protein	0.493816	-1.01795	0.000167929
cce_1657	hypothetical protein	0.684565	-0.54674	0.0205013
cce_1660	oxidoreductase alpha (molybdopterin) subunit	1.24019	0.31056	0.00254888
cce_1662	putative polysaccharide pyruvyl transferase	1.34561	0.428265	0.00673736
cce_1663	hypothetical protein	1.20183	0.265237	0.0403354
cce_1665	2Fe-2S ferredoxin; petF1	0.445945	-1.16506	1.11989e-06
cce_1666	hypothetical protein; contains a GTP-binding protein, HSR1-related domain	0.30494	-1.7134	4.60672e-09
cce_1667	hypothetical protein	0.110165	-3.18226	3.34656e-12
cce_1668	putative modulator of DNA gyrase; tldD	1.12066	0.164352	0.0165391
cce_1670	hydantoinase B/oxoprolinase familly protein	1.51014	0.594686	0.000495207
cce_1673	serine/threonine protein kinase	1.59859	0.676804	0.000108521
cce_1674	glutamyl-tRNA (Gln) amidotransferase subunit B; gatB	1.48579	0.571228	3.13368e-05
cce_1676	hypothetical protein	1.40744	0.493077	0.000236504
cce_1677	conserved hypothetical protein	1.25611	0.328968	0.0104998
cce_1678	unknown	0.795817	-0.329492	0.0482375
cce_1681	unknown	1.41417	0.499952	4.84845e-05
cce_1685	NADH dehydrogenase subunit 4-like protein	1.35736	0.440807	0.00021724
cce_1686	DUF67-containing protein	0.609692	-0.713848	0.000213217
cce_1687	conserved hypothetical protein	1.32698	0.408143	0.0363114
cce_1688	Na+/H+ antiporter	1.74411	0.802493	5.22694e-05
cce_1689	probable sulfate transporter	2.17542	1.12129	5.50335e-09
cce_1691	hypothetical protein	1.64253	0.715916	9.73143e-07
cce_1692	NADH dehydrogenase subunit 5; ndhF4	1.1895	0.250356	0.00500555
cce_1695	two-component response regulator	0.207086	-2.2717	2.29126e-08
cce_1697	transposase	2.06779	1.04809	2.3667e-08
cce_1698	hypothetical protein	1.85384	0.890515	0.00106985
cce_1699	transcriptional regulator, MerR family	2.47696	1.30857	1.51375e-07
cce_1700	probable copper-translocating P-type ATPase	3.52587	1.81798	0.00074182
cce_1701	hypothetical protein; contains a cupredoxin domain	1.7487	0.806284	0.000600261
cce_1702	unknown	1.33184	0.413425	0.00259752
cce_1703	hypothetical protein; contains a plasmid stabilization system domain	1.21394	0.279702	0.0245264
cce_1704	AcrB/AcrD/AcrF family protein	0.784275	-0.350568	0.0257193
cce_1705	hypothetical protein	0.776833	-0.364324	0.00169269
cce_1706	putative addiction module toxin, Txe/YoeB	0.748774	-0.417397	0.0013662
cce_1707	unknown	0.67514	-0.566742	1.26593e-05
cce_1708	unknown; contains a secretion protein HlyD domain	0.624309	-0.679669	0.000147119
cce_1709	hypothetical protein; contains an alpha/beta hydrolase fold-1 domain	1.24633	0.317687	0.00279586
cce_1711	CHP1784-containing protein	0.629543	-0.667624	0.0132798
cce_1712	hypothetical protein	1.59542	0.673934	0.00101749
cce_1714	hypothetical protein	0.695426	-0.52403	0.00739073
cce_1715	conserved hypothetical protein	0.608819	-0.715915	6.70892e-08
cce_1717	probable FMN-dependent alpha-hydroxy acid dehydrogenase	0.797202	-0.326983	0.0135605
cce_1718	putative amidohydrolase	1.70679	0.771287	0.000609162
cce_1720	hypothetical protein; contains a Peptidase aspartic, catalytic domain	0.0265299	-5.23623	1.58731e-11
cce_1721	hypothetical protein	0.909609	-0.136682	0.0127068
cce_1723	unknown	1.30762	0.386941	0.00247575
cce_1724	unknown	0.767077	-0.382557	3.65733e-05
cce_1725	two-component transcriptional regulatory protein	1.41283	0.498585	3.85891e-07
cce_1726	unknown; contains DUF820	0.628498	-0.670019	2.50265e-08
cce_1727	hypothetical protein	1.7487	0.806284	0.000600261
cce_1729	putative carboxyphosphonoenolpyruvate phosphonomutase	1.2506	0.322623	0.0129263
cce_1731	putative Sua5/YciO/YrdC/YwlC	1.23601	0.30569	5.94271e-05
cce_1732	DUF1092-containing protein	0.818216	-0.289446	0.0425534
cce_1733	DUF111-containing protein	1.5662	0.647265	3.23836e-06
cce_1735	conserved hypothetical protein	0.667535	-0.583084	5.93122e-05
cce_1739	hypothetical protein	0.691149	-0.532931	5.50874e-08
cce_1740	hypothetical protein	0.581284	-0.782684	0.00180583
cce_1741	hypothetical protein; contains DUF29	0.748262	-0.418384	0.000462459
cce_1742	hypothetical protein; contains DUF820	0.660957	-0.597371	0.000256036
cce_1743	probable peptidase M52, hydrogen uptake protein	0.348777	-1.51962	6.73968e-06
cce_1745	DNA binding protein HU	1.08329	0.115423	0.0253429
cce_1747	photosystem I iron-sulfur center subunit VII; psaC	1.16517	0.220537	0.0499836
cce_1748	transglycosylase-associated protein	0.62508	-0.677888	6.9743e-06
cce_1749	hypothetical protein; contains a conserved TM helix domain	1.69761	0.763506	1.91431e-06
cce_1750	hypothetical protein	1.3028	0.381618	0.00143408
cce_1751	adaptive-response sensory histidine kinase; sasA	0.944063	-0.0830456	0.035267
cce_1752	putative glycoside hydrolase, family 57	1.18281	0.242217	0.0025333
cce_1753	putative plastid and cyanobacterial ribosomal protein PSRP-3/Ycf65	0.600056	-0.736831	7.15167e-08
cce_1755	conserved hypothetical protein	0.799943	-0.322032	0.0364562
cce_1756	hypothetical protein; contains TPR_1 tetratricopeptide repeat domains	0.333833	-1.5828	2.04642e-08
cce_1757	conserved hypothetical protein	0.379527	-1.39773	3.94905e-05
cce_1758	glutamyl-tRNA synthetase; gltX	0.790565	-0.339044	0.00252249
cce_1760	H+/Ca2+ exchanger	1.33049	0.411954	0.00793084
cce_1761	HAD-superfamily hydrolase, subfamily IA, variant 3	1.19708	0.259514	0.00226001
cce_1762	NADH dehydrogenase subunit J; ndhJ	1.19038	0.251428	0.0289937
cce_1764	NADH dehydrogenase subunit 3; ndhC	1.47976	0.565365	5.46095e-05
cce_1765	hypothetical protein; contains a DNA methylase N-4/N-6 domain	1.71282	0.776376	0.000962394
cce_1766	UPF0227-containing protein	0.26543	-1.9136	2.00919e-08
cce_1767	hypothetical protein	0.757366	-0.400937	0.00295135
cce_1768	probable transcriptional regulator	0.504096	-0.988228	9.05297e-09
cce_1769	hypothetical protein	3.50291	1.80855	4.12124e-06
cce_1770	unknown	1.6058	0.683291	0.0012437
cce_1771	conserved hypothetical protein	1.86252	0.897254	9.03639e-05
cce_1772	aspartoacylase; aspA	1.32227	0.403019	0.000751689
cce_1773	DUF177-containing protein	1.21772	0.284188	0.0153739
cce_1774	biotin acetyl CoA carboxylase ligase; birA	1.41411	0.499895	9.34122e-05
cce_1776	putative Ham1-like protein	1.16034	0.214549	2.30115e-05
cce_1777	probable two-component hybrid sensor and regulator	0.35839	-1.4804	1.78532e-06
cce_1778	unknown	0.361165	-1.46927	1.62456e-05
cce_1780	unknown	0.756537	-0.402517	1.15228e-08
cce_1781	3-phosphoshikimate 1-carboxyvinyltransferase; aroA	1.3517	0.434775	7.15837e-05
cce_1782	putative transposase	0.833274	-0.263136	0.0205328
cce_1783	hypothetical protein	1.25034	0.322325	0.00114841
cce_1786	conserved hypothetical protein	0.0972037	-3.36285	1.56163e-06
cce_1787	conserved hypothetical protein	0.0874921	-3.5147	1.61859e-06
cce_1792	unknown; contains an acid phosphatase/vanadium-dependent haloperoxidase domain	2.94606	1.55879	2.51648e-09
cce_1795	conserved hypothetical protein	1.32321	0.404045	0.00347991
cce_1796	conserved hypothetical protein	2.02944	1.02108	6.54999e-10
cce_1797	unknown	2.47514	1.30751	8.43133e-12
cce_1799	RNA methyltransferase TrmH, group 3; trmH	1.48554	0.570986	2.13777e-05
cce_1800	putative Ribonuclease III	0.728399	-0.4572	0.000105556
cce_1801	unknown; contains an Anti-sigma factor antagonist domain	0.726236	-0.46149	4.22115e-05
cce_1803	hypothetical protein; contains a polysaccharide export protein domain	0.802783	-0.316919	1.08047e-05
cce_1805	hypothetical protein; contains DUF888	1.32346	0.404317	0.000436885
cce_1806	putative glycoside hydrolase, family 13	1.97206	0.979706	7.80943e-08
cce_1807	PAP fibrillin	2.11561	1.08107	1.54075e-07
cce_1808	probable two-component system response regulator, OmpR subfamily	0.517661	-0.949921	3.05875e-05
cce_1810	glutaredoxin-related protein	0.791835	-0.336727	0.0019361
cce_1811	putative BolA-like protein	0.748639	-0.417658	1.26499e-06
cce_1812	probable transcriptional regulator	0.717083	-0.479788	2.07509e-06
cce_1814	putative peptidoglycan-binding peptidase, M23B family	0.552258	-0.856584	0.00244218
cce_1815	hypothetical protein	1.7487	0.806284	0.000600261
cce_1816	transcriptional regulatory protein	0.623289	-0.682027	0.00107226
cce_1818	DNA ligase; ligA	1.20386	0.267669	0.000322462
cce_1821	putative HAD-superfamily hydrolase, subfamily IA	0.635911	-0.653103	1.35801e-05
cce_1822	S-adenosylmethionine synthetase; metK	1.42687	0.512852	8.79234e-07
cce_1823	hypothetical protein	0.634251	-0.656874	0.00119778
cce_1824	conserved hypothetical protein	0.463352	-1.10982	8.54466e-06
cce_1825	hypothetical protein	0.580528	-0.784562	0.000142949
cce_1826	hypothetical protein	0.720802	-0.472325	0.000395649
cce_1829	lipid A disaccharide synthase; lpxB2	1.20475	0.268733	9.51135e-05
cce_1831	hypothetical protein; contains a CHP1784 domain	1.18132	0.240404	0.0181054
cce_1832	hypothetical protein; contains a Thioesterase superfamily domain	0.357252	-1.48499	0.000205267
cce_1833	hypothetical protein	0.433373	-1.20632	3.42605e-05
cce_1835	hypothetical protein; contains UPF0150	0.527484	-0.922802	1.96106e-06
cce_1836	hypothetical protein; contains a YcfA domain	0.464984	-1.10475	7.73875e-05
cce_1838	hypothetical protein	0.573943	-0.80102	7.00327e-11
cce_1840	DUF448-containing protein	2.54598	1.34822	2.91954e-13
cce_1842	DUF150-containing protein	1.90364	0.92876	8.72232e-10
cce_1844	unknown; contains an EF-Hand type domain	0.0292675	-5.09455	1.25544e-14
cce_1845	hypothetical protein	0.796371	-0.328487	0.0298748
cce_1846	hypothetical protein	0.68476	-0.54633	5.53615e-05
cce_1848	probable two-component sensor histidine kinase	4.71496	2.23724	2.58736e-10
cce_1849	NADH dehydrogenase subunit M; ndhM	1.53389	0.617196	7.19993e-08
cce_1850	malate dehydrogenase; mdh	1.14045	0.189609	0.000838305
cce_1851	hypothetical protein	0.806052	-0.311054	0.00611534
cce_1852	polysaccharide deacetylase	0.296084	-1.75592	1.60764e-06
cce_1853	serine/threonine kinase; pknA	1.08504	0.117743	0.0129811
cce_1854	unknown	0.791438	-0.337452	0.00952884
cce_1855	conserved hypothetical protein	0.792809	-0.334954	2.22669e-06
cce_1856	conserved hypothetical protein	0.790486	-0.339189	0.000666499
cce_1858	hypothetical protein	1.43885	0.524921	7.88269e-05
cce_1860	hypothetical protein	1.61431	0.690921	0.00527455
cce_1861	ribokinase	1.68091	0.749241	5.72309e-06
cce_1862	transposase	0.712538	-0.488962	0.0146104
cce_1863	hypothetical protein	1.56557	0.646691	0.00081232
cce_1865	2-succinyl-6-hydroxy-2, 4-cyclohexadiene-1-carboxylic acid synthase/2-oxoglutarate decarboxylase; menD	0.75365	-0.408034	1.04857e-05
cce_1866	conserved hypothetical protein	1.22592	0.293865	0.0258748
cce_1868	hypothetical protein	2.27181	1.18384	0.000203716
cce_1870	unknown	0.778613	-0.361022	0.00536907
cce_1872	unknown; contains a Cytochrome c region domain	2.04459	1.03181	3.54501e-08
cce_1875	putative Mov34/MPN/PAD-1	1.42083	0.506735	0.00668135
cce_1876	conserved hypothetical protein	0.522356	-0.936894	1.55151e-08
cce_1877	hypothetical protein; contains a PAS domain, GGDEF domain, EAL domain, Response regulator receiver domain, CheY-like domain, and a PAS fold domain	1.65989	0.731086	3.75341e-08
cce_1878	two-component sensor histidine kinase	0.832526	-0.264432	0.0309399
cce_1880	unknown	1.67436	0.74361	0.00081578
cce_1881	conserved hypothetical protein	0.656476	-0.607185	0.000220999
cce_1882	hypothetical protein	1.50414	0.588938	2.47407e-06
cce_1883	hypothetical protein	1.3342	0.415977	0.0022235
cce_1884	hypothetical protein	1.47021	0.55602	7.17281e-06
cce_1885	hypothetical protein	0.579033	-0.788283	0.000574382
cce_1886	hypothetical protein	1.79466	0.843709	2.15857e-05
cce_1887	hypothetical protein; contains a Phage integrase-like, catalytic core domain	0.348384	-1.52125	3.44036e-07
cce_1889	unknown	1.81902	0.863159	8.37224e-07
cce_1890	unknown	1.73493	0.794881	3.59629e-06
cce_1891	unknown	1.54966	0.631947	2.8794e-05
cce_1894	conserved hypothetical protein	1.15848	0.212232	0.0496434
cce_1895	Na+/H+ antiporter	1.37	0.454178	3.84425e-05
cce_1898	probable transcriptional regulator; patB	0.0405792	-4.62311	6.6179e-09
cce_1899	SOS function regulatory protein; lexA	1.82604	0.868718	1.8436e-10
cce_1900	citrate synthase; gltA	1.5833	0.662935	1.89517e-05
cce_1902	molybdenum cofactor biosynthesis protein A; moaA	0.664191	-0.590329	1.57666e-05
cce_1906	hypothetical protein; contains DUF86	0.152796	-2.71032	7.4618e-06
cce_1907	hypothetical protein	0.533729	-0.905822	0.000521454
cce_1908	conserved hypothetical protein	0.225424	-2.14929	8.03498e-05
cce_1909	hypothetical protein	0.539015	-0.891602	0.00160663
cce_1910	ATP-dependent Clp protease, proteolytic subunit; clpP4	1.18046	0.239349	0.00533978
cce_1912	hypothetical protein	0.697655	-0.519415	6.92623e-06
cce_1913	hypothetical protein	0.689213	-0.536977	0.00174142
cce_1914	unknown	0.489379	-1.03098	2.33703e-06
cce_1915	hypothetical protein	0.765918	-0.384738	0.0143787
cce_1916	hypothetical protein	0.650299	-0.620826	0.00175098
cce_1917	cation-transporting ATPase	0.407824	-1.29398	9.00893e-11
cce_1918	hypothetical protein	0.270482	-1.8864	2.41036e-10
cce_1920	putative glycosyl transferase	0.872297	-0.197109	0.000499327
cce_1926	hypothetical protein	0.631042	-0.664191	0.048282
cce_1928	unknown	0.889184	-0.169446	0.0292199
cce_1929	hypothetical protein	1.7487	0.806284	0.000600261
cce_1930	hypothetical protein	0.19441	-2.36283	2.14802e-09
cce_1933	unknown	0.533563	-0.906269	5.2877e-08
cce_1934	putative adenylate/guanylate cyclase	0.889209	-0.169405	0.0255884
cce_1936	hypothetical protein	0.459804	-1.12091	1.34178e-06
cce_1938	CHP1784-containing protein	0.59249	-0.755138	3.10162e-09
cce_1939	hypothetical protein	0.770926	-0.375336	0.0446419
cce_1940	hypothetical protein	0.563843	-0.826634	6.02984e-05
cce_1941	ATP-dependent Clp protease, ATP-binding subunit; clpB1	2.59251	1.37435	7.84099e-10
cce_1942	RNA-binding protein	0.549189	-0.864625	7.6687e-06
cce_1943	unknown	1.49864	0.583658	0.00731852
cce_1944	phycobilisome core component; apcF	1.50752	0.592178	2.60279e-05
cce_1945	preprotein translocase subunit SecA; secA	1.36364	0.447461	1.10612e-05
cce_1947	unknown; contains DUF88	0.854432	-0.226962	0.00333361
cce_1948	unknown	0.861506	-0.215067	0.000237729
cce_1949	unknown; contains carbohydrate kinase and YjeF-related protein, N-terminal domains	0.496539	-1.01002	7.94482e-06
cce_1950	transposase	0.584381	-0.775018	9.71162e-07
cce_1951	probable ferric uptake regulator; fur2	0.328604	-1.60558	2.05812e-09
cce_1952	two-component response regulator receiver protein	0.669964	-0.577845	1.29761e-07
cce_1954	light-independent protochlorophyllide reductase, B subunit; chlB	3.80828	1.92914	8.35749e-09
cce_1955	hypothetical protein	2.29345	1.19752	3.86629e-06
cce_1956	unknown	1.7487	0.806284	0.000600261
cce_1957	hypothetical protein; contains UPF0150	0.778961	-0.360377	0.000715798
cce_1958	hypothetical protein; contains a YcfA domain	0.613858	-0.704022	1.43975e-06
cce_1959	hypothetical protein; contains a plasmid stabilization system domain	0.731756	-0.450566	0.000846748
cce_1960	unknown	0.638923	-0.646286	1.30362e-06
cce_1961	GTP-binding protein	0.678912	-0.558703	5.29305e-07
cce_1962	signal peptidase I; lepB3	1.15008	0.201728	0.0366243
cce_1966	unknown	1.15911	0.213018	0.00739662
cce_1967	unknown	1.32506	0.406059	1.21968e-05
cce_1968	unknown	1.7487	0.806284	0.000600261
cce_1969	unknown	1.06776	0.0945812	0.0159031
cce_1972	protein involved in disulfide bond formation	0.787091	-0.345397	0.00100503
cce_1974	hypothetical protein	0.332449	-1.5888	0.00139292
cce_1976	cytochrome c oxidase subunit I; coxA1/ctaD1	0.771192	-0.374838	6.26145e-05
cce_1977	cytochrome c oxidase subunit II; coxB1/ctaC1	0.63099	-0.66431	1.04378e-13
cce_1978	unknown	0.436401	-1.19627	3.7749e-08
cce_1979	rfrA family pentapeptide repeat	0.742508	-0.429522	0.0148097
cce_1980	hypothetical protein; contains a Rhodanese-like domain	1.20412	0.267975	0.00112431
cce_1981	cobalamin biosynthesis protein D; cbiD	1.42816	0.514157	0.000775141
cce_1982	CheY-like two-component hybrid sensor and regulator	1.48364	0.569145	0.000337299
cce_1983	probable phytochrome A, two-component sensor protein; aphA	1.52825	0.611881	0.00162848
cce_1986	unknown	1.20382	0.267618	3.0936e-05
cce_1987	CHP488-containing protein	1.39737	0.482716	0.0182593
cce_1988	conserved hypothetical protein	0.819353	-0.287443	0.01562
cce_1993	hypothetical protein	1.26742	0.341893	0.00735712
cce_1994	unknown	1.7466	0.804552	1.31126e-06
cce_1995	virulence factor MviN-like protein	2.50085	1.32242	4.17446e-07
cce_1996	Na+/H+ antiporter	1.65434	0.72626	3.19202e-06
cce_1997	hypothetical protein	0.378317	-1.40233	1.26227e-07
cce_1998	conserved hypothetical protein	1.17296	0.230148	0.0464024
cce_2002	hypothetical protein	2.64955	1.40575	6.85811e-08
cce_2005	hypothetical protein	0.457259	-1.12892	5.19469e-06
cce_2006	hypothetical protein; contains a DoxX domain	0.363337	-1.46062	0.000368252
cce_2007	hypothetical protein; contains a secretion protein HlyD domain	0.671767	-0.573968	0.000324082
cce_2008	hypothetical protein	1.98209	0.987023	8.95737e-07
cce_2010	Mg2+ transporter; mgtE1	0.825007	-0.277522	0.0454374
cce_2012	hypothetical protein	1.60581	0.683305	5.04269e-05
cce_2013	DUF1092-containing protein	1.26084	0.334386	4.94486e-05
cce_2014	putative ATP/GTP-binding protein	1.7487	0.806284	0.000600261
cce_2016	acetyl-coenzyme A synthetase; acs	2.5788	1.3667	2.70224e-10
cce_2017	hypothetical protein	0.575092	-0.798135	0.000385479
cce_2018	unknown	0.589691	-0.761968	0.00080501
cce_2020	conserved hypothetical protein	0.793169	-0.3343	0.0134479
cce_2021	hypothetical protein	0.88858	-0.170426	0.0371338
cce_2022	hypothetical protein	1.17779	0.236081	0.00769415
cce_2023	unknown	1.43978	0.52585	0.0164055
cce_2024	unknown	1.43123	0.517256	0.00131505
cce_2025	unknown; contains DUF820	2.27688	1.18706	1.57382e-05
cce_2026	CobB/CobQ-like glutamine amidotransferase	0.807456	-0.308545	0.00166495
cce_2028	ATP-binding protein of ABC transporter	1.23963	0.309909	0.00139369
cce_2030	hypothetical protein	0.244575	-2.03165	1.49506e-06
cce_2031	hypothetical protein	0.717306	-0.47934	0.000494616
cce_2032	hypothetical protein; contains PAS fold-3, GAF, ELA, and GGDEF domains	0.701046	-0.51242	0.000193319
cce_2033	hypothetical protein; contains a Glycosyl transferase, family 39 domain	1.7487	0.806284	0.000600261
cce_2034	unknown	0.914962	-0.128217	0.00673936
cce_2035	hypothetical protein	1.7487	0.806284	0.000600261
cce_2038	carbamoyl-phosphate synthase, large subunit; carB	1.18507	0.244968	0.000270443
cce_2040	hypothetical protein	1.2801	0.356252	0.00991171
cce_2041	hypothetical protein; contains DUF81	1.23064	0.299405	0.0106686
cce_2042	hypothetical protein; contains DUF477	1.3443	0.426853	0.0170137
cce_2047	unknown	0.506602	-0.981075	3.58013e-08
cce_2048	hypothetical protein	1.58985	0.668888	0.00282478
cce_2050	two-component system, regulatory protein	0.626179	-0.675353	2.77093e-05
cce_2052	DUF1517-containing protein	1.36309	0.446883	5.73959e-05
cce_2053	unknown	0.682595	-0.550897	4.39761e-05
cce_2055	unknown	0.76858	-0.379732	0.0085397
cce_2056	putative group 3/4 sigma-70 RNA polymerase sigma factor	1.55937	0.640961	0.00215687
cce_2057	unknown	0.698776	-0.517098	3.42676e-05
cce_2058	hypothetical protein; contains a Chase2 domain	1.36619	0.450155	0.00616152
cce_2059	bifunctional phosphopantothenoylcysteine decarboxylase/phosphopantothenate--cysteine ligase	1.5936	0.672286	2.21711e-06
cce_2060	unknown	1.14065	0.189856	0.0447865
cce_2061	mannose-1-phosphate guanyltransferase	1.23643	0.306183	0.00349184
cce_2064	rfrA family pentapeptide repeat	0.736364	-0.441509	0.00344019
cce_2065	unknown	1.31698	0.397233	0.0162043
cce_2066	NUDIX hydrolase	1.16149	0.215981	0.0190086
cce_2067	carbohydrate kinase, FGGY family	1.37414	0.458524	0.0142579
cce_2069	hypothetical protein	0.735975	-0.442272	0.0233012
cce_2070	unknown	1.46722	0.553086	0.00073823
cce_2071	hypothetical protein	1.78571	0.836499	2.43756e-05
cce_2072	unknown	1.32581	0.406871	0.00331705
cce_2073	unknown	0.361994	-1.46596	6.95828e-08
cce_2074	hypothetical protein	0.532598	-0.908881	2.95199e-09
cce_2075	putative 5-oxoprolinase (ATP-hydrolyzing)	0.406158	-1.29989	5.50499e-07
cce_2077	hypothetical protein; contains a Cupin, RmlC-type domain	0.350257	-1.51351	2.616e-05
cce_2078	DUF1350-containing protein	1.4281	0.514094	2.62431e-05
cce_2079	conserved hypothetical protein	2.00576	1.00415	4.63255e-08
cce_2080	unknown	1.80815	0.854511	3.04858e-09
cce_2081	hypothetical protein	2.07687	1.05441	3.63808e-13
cce_2082	acetyl-CoA carboxylase beta subunit; accD	1.96704	0.976026	1.97992e-14
cce_2083	transposase	0.892025	-0.164843	0.0466812
cce_2087	oxygen independent coprophorphyrinogen III oxidase 2	0.538571	-0.892791	0.000631585
cce_2088	unknown; contains a PilT, N-terminal domain	1.44635	0.53242	6.59702e-05
cce_2089	hypothetical protein; contains a serralysin-like metalloprotease, C-terminal and PKD domains	0.46053	-1.11863	9.68295e-05
cce_2090	putative ABC transporter permease protein	1.21971	0.286534	0.00918043
cce_2094	hypothetical protein; contains a Methyltransferase type 11 domain	0.882053	-0.181063	0.00414291
cce_2095	unknown	0.737744	-0.438807	3.56965e-05
cce_2096	probable glycosyl transferase, family 2	0.48743	-1.03673	1.02716e-08
cce_2098	unknown	0.901833	-0.149068	0.000683473
cce_2099	hypothetical protein; contains a methyltransferase, FkbM domain	0.838711	-0.253755	0.01629
cce_2100	probable glycosyl transferase	0.698678	-0.517301	1.85565e-07
cce_2101	nucleotide sugar epimerase	1.17469	0.232285	0.00575877
cce_2102	hypothetical protein	1.13954	0.188451	0.0290106
cce_2103	rfrA family pentapeptide repeat	0.909357	-0.137082	0.0344439
cce_2104	hypothetical protein; contains UPF0102	0.592436	-0.755268	5.63208e-05
cce_2105	hypothetical protein; contains tetratricopeptide repeat domains	1.79513	0.844087	8.16805e-07
cce_2106	probable ferredoxin	1.85362	0.890348	0.00708567
cce_2107	hypothetical protein; contains a Phycobilisome protein and a globin-like domain	2.32239	1.21561	7.59744e-06
cce_2108	probable ferredoxin	2.11502	1.08067	3.12092e-09
cce_2109	hypothetical protein; contains a 4-vinyl reductase, 4VR domain	2.13264	1.09264	0.0097261
cce_2110	hypothetical protein; contains a Phycobilisome protein and a globin-like domain	1.70643	0.770984	0.000296733
cce_2111	hypothetical protein	1.25442	0.327016	0.012831
cce_2112	hypothetical protein; contains a 4-vinyl reductase, 4VR domain	1.5091	0.593689	0.0023351
cce_2113	hypothetical protein	1.7487	0.806284	0.000600261
cce_2114	hypothetical protein; contains DUF1622	0.678196	-0.560225	0.000599656
cce_2115	putative 6-pyruvoyl tetrahydrobiopterin synthase	0.737402	-0.439477	9.54582e-05
cce_2118	conserved hypothetical protein	0.26598	-1.91061	7.9289e-05
cce_2119	hypothetical protein	0.212469	-2.23468	0.000468878
cce_2121	acetyl-CoA carboxylase, biotin carboxyl carrier protein; accB	1.8596	0.894994	1.19387e-09
cce_2123	hypothetical protein; contains a Methyltransferase type 11 domain	1.91558	0.937783	3.02589e-07
cce_2125	conserved hypothetical protein	1.56277	0.644108	3.05033e-06
cce_2127	DUF901-containing protein	0.432519	-1.20917	1.9414e-06
cce_2128	NADH dehydrogenase subunit L; ndhL	0.633592	-0.658374	6.57109e-05
cce_2129	unknown	0.837741	-0.255424	0.00684843
cce_2131	hypothetical protein	1.11647	0.158944	0.0173463
cce_2132	glyceraldehyde-3-phosphate dehydrogenase, type I	1.20689	0.271291	0.0140405
cce_2134	D-3-phosphoglycerate dehydrogenase; serA	1.45374	0.539765	9.21117e-05
cce_2136	hypothetical protein; contains DUF955	1.73169	0.792177	1.55445e-05
cce_2137	ATP-dependent DNA helicase; recQ	0.337548	-1.56684	2.50289e-08
cce_2138	unknown; contains a proto-chlorophyllide reductase 57 kD subunit	0.89296	-0.163333	0.0144465
cce_2139	probable alpha-glucosidase; malZ	1.80298	0.850385	7.58236e-09
cce_2140	unknown	1.20785	0.272437	0.000191872
cce_2141	TRAP dicarboxylate transporter, DctP subunit	1.20102	0.264262	0.0141513
cce_2142	hypothetical protein	0.490832	-1.0267	0.000561929
cce_2143	StbB-like plasmid stabilization protein	0.522408	-0.936751	0.00620634
cce_2144	hypothetical protein	0.685868	-0.543997	0.00651384
cce_2145	hypothetical protein	0.700238	-0.514084	0.0224708
cce_2146	hypothetical protein	1.97906	0.984817	3.81709e-07
cce_2147	unknown	0.251565	-1.991	4.71131e-07
cce_2148	putative plasmid maintenance toxin/Cell growth inhibitor	0.253433	-1.98032	7.84097e-08
cce_2149	unknown; contains DUF820	0.630201	-0.666116	3.09568e-06
cce_2150	hypothetical protein; contains a transglutaminase-like domain	1.7487	0.806284	0.000600261
cce_2151	hypothetical protein; contains a Methyltransferase type 11 domain	1.45903	0.545007	0.00153364
cce_2152	DNA mismatch repair protein; mutS1	1.09921	0.136464	0.020401
cce_2155	unknown	0.368986	-1.43836	6.47548e-06
cce_2156	enolase; eno1	0.85908	-0.219135	0.000481328
cce_2159	hypothetical protein	1.38146	0.466195	0.00726181
cce_2160	hypothetical protein	1.64826	0.720948	4.00496e-06
cce_2161	hypothetical protein	2.18177	1.1255	0.000787751
cce_2163	hypothetical protein	1.44376	0.529832	0.00852034
cce_2164	hypothetical protein	0.817732	-0.2903	0.0278061
cce_2165	hypothetical protein	1.7487	0.806284	0.000600261
cce_2166	hypothetical protein	1.19181	0.253155	0.00287583
cce_2170	polyphosphate kinase; ppk1	1.5694	0.65021	3.91055e-06
cce_2171	peptidyl-prolyl cis-trans isomerase B; ppiB	1.38456	0.469431	0.000593958
cce_2172	photosystem I assembly protein; ycf4	1.11429	0.156123	0.0154886
cce_2173	hypothetical protein	2.36854	1.244	0.00114872
cce_2174	WD-40 repeat-containing serine/threonine protein kinase	0.720664	-0.472601	0.00014869
cce_2175	hypothetical protein; contains Forkhead-associated, ferredoxin, and Oxidoreductase FAD/NAD(P)-binding domains	0.561286	-0.833192	0.0193041
cce_2176	hypothetical protein	0.764552	-0.387314	0.000360694
cce_2177	hypothetical protein	0.195724	-2.35311	3.67454e-10
cce_2178	hypothetical protein; contains a YcfA domain	0.508565	-0.975495	4.17152e-07
cce_2179	hypothetical protein; contains UPF0150	0.501701	-0.995099	0.0010991
cce_2180	hypothetical protein	0.48025	-1.05814	1.04624e-09
cce_2184	unknown	1.71384	0.77723	7.68924e-06
cce_2186	WD-40 repeat protein	1.66101	0.732064	2.46278e-08
cce_2187	hypothetical protein	1.74367	0.802125	0.000620109
cce_2188	hypothetical protein	1.87445	0.906464	0.00262945
cce_2189	hypothetical protein	1.9721	0.979734	3.59694e-06
cce_2190	hypothetical protein	3.98502	1.99459	1.96585e-05
cce_2191	hypothetical protein	1.7487	0.806284	0.000600261
cce_2192	putative HlyD-family secretion protein	1.7487	0.806284	0.000600261
cce_2193	toxin secretion ABC transporter ATP-binding protein; hlyB1	1.7487	0.806284	0.000600261
cce_2194	conserved hypothetical protein	1.7487	0.806284	0.000600261
cce_2195	hypothetical protein; contains a hemolysin-type calcium-binding region	0.70365	-0.507071	0.0174486
cce_2196	WD-repeat protein	0.611435	-0.709728	0.000514365
cce_2198	conserved hypothetical protein	1.55437	0.636334	0.00349482
cce_2199	conserved hypothetical protein	0.757859	-0.399998	0.00105322
cce_2200	putative YCF41; ycf41	0.782811	-0.353264	1.45931e-06
cce_2204	hypothetical protein	1.53907	0.622055	0.000368562
cce_2205	hypothetical protein; contains a cell envelope-related transcriptional attenuator domain	1.09037	0.12482	0.00345
cce_2206	CHP02450-containing protein	0.566921	-0.81878	5.12809e-06
cce_2207	UDP-3-O-(3-hydroxymyristoyl) glucosamine N-acyltransferase; lpxD	1.10351	0.142106	0.00450391
cce_2208	hypothetical protein; contains an FMN-binding split barrel-related domain	1.71584	0.778911	0.000315856
cce_2209	hypothetical protein; contains a peptidase M20 domain	1.57491	0.655266	3.52475e-05
cce_2210	unknown	1.7498	0.807188	5.98127e-06
cce_2211	unknown; contains a ThiJ/PfpI domain	0.575568	-0.796943	7.45383e-06
cce_2212	hypothetical protein	0.30349	-1.72028	9.32749e-09
cce_2214	putative CAB/ELIP/HLIP family protein	0.41919	-1.25432	8.41075e-11
cce_2215	probable retinal pigment epithelial membrane protein	1.95237	0.965229	1.60618e-08
cce_2216	unknown; contains a CHP730 domain	1.32615	0.407244	0.000425207
cce_2217	hypothetical protein	0.472843	-1.08057	7.04933e-05
cce_2218	hypothetical protein; contains DUF457, transmembrane	0.437067	-1.19407	1.27049e-06
cce_2219	hypothetical protein; contains a GCN5-related N-acetyltransferase domain	0.246202	-2.02209	7.36774e-08
cce_2220	unknown; contains FAD dependent oxidoreductase and Phytoene dehydrogenase-related domains	0.65458	-0.611358	1.28876e-05
cce_2222	NADH dehydrogenase subunit 6; ndhG	1.22365	0.291188	0.0208188
cce_2223	NADH dehydrogenase subunit I; ndhI	1.19354	0.255246	0.00031299
cce_2225	phosphoketolase	2.20956	1.14376	5.14693e-08
cce_2226	putative pterin-4-alpha-carbinolamine dehydratase; dcoH2	1.62446	0.699956	2.46066e-07
cce_2227	putative peptidase S66, LD-carboxypeptidase A	0.379503	-1.39782	2.28737e-06
cce_2228	hypothetical protein	0.358219	-1.48109	9.28266e-06
cce_2230	ATP-binding protein of ABC transporter	1.7248	0.786429	7.72793e-06
cce_2232	two-component sensor histidine kinase	1.59391	0.672574	9.33949e-06
cce_2233	putative amine oxidase	1.28605	0.362944	0.00301865
cce_2235	tRNA (guanine-N1)-methyltransferase; trmD	1.386	0.470929	0.00105801
cce_2236	cyanophycinase; cphB	0.833909	-0.262038	0.000959348
cce_2238	putative ATP-dependent Clp protease, adaptor protein; clpS1	0.791161	-0.337956	0.0176111
cce_2239	hypothetical protein; contains an abortive infection protein domain	1.48002	0.565617	0.027153
cce_2241	hypothetical protein; contains a Filamentous haemagglutinin, N-terminal domain	0.732668	-0.448768	0.0200892
cce_2242	hypothetical protein; contains a bacterial surface antigen (D15) domain	0.470893	-1.08653	0.000594876
cce_2243	unknown; contains a GGDEF domain, EAL domain, and a pass fold-4 domain	1.7487	0.806284	0.000600261
cce_2248	1,4-alpha-glucan branching enzyme; glgB1	1.12937	0.175518	0.0273536
cce_2249	hypothetical protein; contains TPR_1 tetratricopeptide repeat domains	0.667704	-0.58272	0.0149615
cce_2250	unknown	1.9715	0.979291	1.12919e-05
cce_2251	conserved hypothetical protein	0.643643	-0.635667	4.27384e-08
cce_2253	mannose-1-phosphate guanylyltransferase; manC	1.2315	0.300411	0.000266638
cce_2254	hypothetical protein	0.432527	-1.20914	0.000221394
cce_2255	DNA polymerase I; polA	0.737231	-0.439811	9.21124e-05
cce_2257	beta-carbonic anhydrase, carboxysomal; icfA1	1.52785	0.611507	3.13032e-05
cce_2260	probable transposase	0.42578	-1.23182	8.75678e-05
cce_2263	hypothetical protein	0.747344	-0.420156	0.000352579
cce_2264	hypothetical protein	0.749393	-0.416206	0.011312
cce_2265	unknown	1.79451	0.843587	1.18944e-08
cce_2266	putative glucokinase regulatory-like protein	2.40775	1.26768	8.09274e-10
cce_2267	unknown; contains a peptidase M50 domain	1.87488	0.9068	5.14593e-06
cce_2268	extracellular solute-binding protein, family 3	1.52355	0.607433	6.72869e-06
cce_2271	hypothetical protein	0.741099	-0.432261	0.00840594
cce_2273	unknown; contains DUF39	1.21821	0.284765	0.048034
cce_2275	unknown	1.39402	0.479251	0.0229116
cce_2276	putative UvrD/REP helicase	1.2644	0.338451	0.000199671
cce_2278	hypothetical protein; contains TPR_1 tetratricopeptide repeat domains	0.196595	-2.3467	7.94573e-07
cce_2279	putative Lipolytic enzyme, G-D-S-L	0.512114	-0.965464	7.92877e-07
cce_2280	hypothetical protein	1.54782	0.630237	0.00277037
cce_2281	putative Type II restriction enzyme NspV	0.550636	-0.860828	1.22432e-06
cce_2283	probable ketosteroid isomerase	0.831726	-0.26582	0.00664809
cce_2286	hypothetical protein	1.20771	0.272273	0.00268552
cce_2288	unknown; contains TPR_1 tetratricopeptide repeat domains	0.534433	-0.903918	1.71781e-12
cce_2289	DUF790-containing protein	0.83294	-0.263716	0.0197419
cce_2290	hypothetical protein	0.446775	-1.16238	0.000105692
cce_2294	hypothetical protein	1.2875	0.36457	7.81719e-05
cce_2295	NADH dehydrogenase subunit 5; ndhF1	0.875964	-0.191057	0.000656557
cce_2296	conserved hypothetical protein	0.719758	-0.474416	0.00463821
cce_2298	adenine phosphoribosyltransferase; apt	0.825663	-0.276376	1.10379e-05
cce_2299	conserved hypothetical protein	0.762474	-0.391239	0.00201478
cce_2300	short-chain dehydrogenase/reductase (SDR) superfamily protein	0.687765	-0.540013	4.18299e-05
cce_2301	hypothetical protein; contains a HAD-superfamily hydrolase subfamily IIB domain	0.642989	-0.637133	0.00199043
cce_2302	undecaprenyl pyrophosphate synthetase; uppS1	1.49073	0.576024	0.00209068
cce_2305	indole-3-glycerol phosphate synthase; trpC	0.930143	-0.104476	0.012711
cce_2306	unknown	0.816605	-0.29229	4.80715e-05
cce_2308	phycocyanin alpha-subunit phycocyanobilin lyase; cpcF	1.15551	0.208525	0.025152
cce_2309	unknown	1.10978	0.150279	0.0176222
cce_2310	conserved hypothetical protein	1.58318	0.662821	2.34577e-05
cce_2312	4-hydroxy-3-methylbut-2-en-1-yl diphosphate synthase; ispG	1.92615	0.945719	4.69575e-07
cce_2313	hypothetical protein	0.371956	-1.4268	2.07321e-06
cce_2315	hydrogenase large subunit; hoxH	2.52645	1.33711	7.82617e-08
cce_2316	hydrogenase small subunit; hoxY	1.77992	0.83181	2.06097e-07
cce_2317	hydrogenase chain U; hoxU	1.42831	0.514307	2.63598e-05
cce_2318	NADH dehydrogenase I chain F; hoxF	1.33121	0.412737	0.00358497
cce_2324	heme oxygenase; ho2	1.16241	0.217116	0.0411
cce_2327	N6 adenine-specific DNA methyltransferase, D12 class	0.640238	-0.643319	2.16762e-09
cce_2328	putative Fe-S metabolism associated SufE	0.722979	-0.467974	7.47965e-05
cce_2331	putative D-alanyl-D-alanine carboxypeptidase	0.860983	-0.215943	0.00205638
cce_2332	hypothetical protein	1.38421	0.469061	0.00194885
cce_2333	probable translation initiation factor, aIF-2BI	4.0361	2.01296	8.75104e-13
cce_2334	unknown	0.52613	-0.926509	1.69123e-06
cce_2335	DNA helicase	1.46901	0.554848	0.000275549
cce_2336	hypothetical protein	1.7487	0.806284	0.000600261
cce_2337	group 2 sigma-70 RNA polymerase sigma factor	1.28242	0.358871	0.00638848
cce_2343	hypothetical protein	0.807624	-0.308243	0.000260639
cce_2344	hypothetical protein	0.545861	-0.873395	8.86423e-05
cce_2346	unknown	1.20486	0.268869	8.2511e-05
cce_2347	unknown; contains a PHP, C-terminal domain	0.559942	-0.836651	1.37071e-07
cce_2348	hypothetical protein	0.291406	-1.7789	5.64599e-06
cce_2349	unknown; contains a single-stranded nucleic acid binding R3H and AAA ATPase domain	0.718886	-0.476165	0.00031984
cce_2350	putative alpha-helical ferredoxin	0.741693	-0.431105	0.00472889
cce_2351	hypothetical protein	0.668841	-0.580265	0.00790364
cce_2352	putative K+-dependent Na+/Ca+ exchanger protein	1.43276	0.518801	0.000132718
cce_2353	unknown	1.47133	0.55712	6.70759e-06
cce_2354	unknown	1.90403	0.929058	3.41217e-10
cce_2355	toxin secretion ABC transporter ATP-binding protein, HlyB family	2.13903	1.09695	2.09654e-10
cce_2356	putative secretion protein, HlyD family	2.85563	1.51381	3.17524e-13
cce_2357	putative succinyl-CoA synthetase beta chain; sucC	1.68834	0.755602	3.97775e-09
cce_2358	putative succinyl-CoA synthetase alpha chain; sucD	1.30329	0.38216	1.1954e-05
cce_2359	homoserine dehydrogenase; thrA	0.829524	-0.269644	0.00869397
cce_2360	hypothetical protein; contains a Peptidase M23B and Peptidoglycan-binding domain	0.731451	-0.451168	0.00181228
cce_2361	UDP-glucose 4-epimerase; galE1	1.48934	0.574671	5.83566e-08
cce_2362	putative glycosyl transferase, group I	1.36559	0.449525	0.000207274
cce_2365	two-component response regulator	0.784062	-0.35096	0.02166
cce_2366	two-component sensor histidine kinase	0.511279	-0.967816	2.31788e-08
cce_2367	hypothetical protein	0.867486	-0.205087	0.0212756
cce_2368	transposase	0.814329	-0.296316	0.00853712
cce_2369	transposase, IS200-like	2.24599	1.16735	1.91708e-05
cce_2370	hypothetical protein	1.93834	0.954824	5.3786e-07
cce_2372	UDP-N-acetylenolpyruvoylglucosamine reductase; murB	1.97015	0.978302	8.6877e-10
cce_2373	UDP-N-acetylmuramate-alanine ligase; murC	2.58133	1.36812	2.30276e-08
cce_2374	putative ribose ABC transporter	1.19841	0.26112	0.000215177
cce_2375	two-component hybrid sensor and regulator	0.540779	-0.886888	0.000345148
cce_2379	bacterial surface antigen D15-like protein	1.64184	0.715317	1.13716e-05
cce_2381	unknown	1.37998	0.464644	0.0103909
cce_2382	conserved hypothetical protein	0.789859	-0.340332	0.00394388
cce_2384	hypothetical protein	0.602687	-0.730519	0.000113765
cce_2385	hypothetical protein; contains a mechanosensitive ion channel, MscS domain	0.463655	-1.10888	0.000599222
cce_2387	unknown	0.619009	-0.691968	1.54358e-06
cce_2388	unknown	1.61723	0.693527	6.07173e-06
cce_2389	hypothetical protein	0.461702	-1.11497	1.50014e-10
cce_2390	thioredoxin M; trxM2	0.496227	-1.01093	5.51527e-07
cce_2391	glucosylglycerol-phosphate synthase	1.43433	0.520375	5.90373e-06
cce_2392	conserved hypothetical protein	0.698508	-0.517652	0.00239711
cce_2393	hypothetical protein; contains a YcfA domain	0.534043	-0.904973	2.62338e-05
cce_2394	hypothetical protein; contains UPF0150	0.404193	-1.30688	8.69333e-05
cce_2395	hypothetical protein	0.459191	-1.12283	7.97568e-07
cce_2396	unknown	1.6742	0.74347	2.6729e-07
cce_2397	conserved hypothetical protein	0.761168	-0.393713	0.000164586
cce_2398	hypothetical protein	0.205873	-2.28017	2.57356e-13
cce_2400	hypothetical protein	0.143903	-2.79683	5.57004e-17
cce_2401	unknown; contains glutaredoxin 2 and thioredoxin fold domains	0.670576	-0.576527	0.000128787
cce_2402	putative membrane protein	0.548057	-0.867602	6.40955e-06
cce_2403	unknown; contains an oxidoreductase, molybdopterin binding domain	0.88532	-0.175729	0.0107738
cce_2404	hypothetical protein; contains glycosyl transferase, family 2 and Methyltransferase FkbM domains	0.780565	-0.35741	0.000225752
cce_2405	hypothetical protein	2.22324	1.15266	1.93409e-10
cce_2407	unknown	1.23927	0.309489	0.000908074
cce_2408	unknown	0.370797	-1.4313	1.53375e-08
cce_2410	extracellular solute-binding protein, family 3	0.944428	-0.0824874	0.0314814
cce_2411	unknown; contains a UspA domain	1.98378	0.98825	3.08112e-05
cce_2414	putative fdxN element excision controlling factor protein; xisH4	1.39458	0.479834	0.00013817
cce_2415	XisI-like fdxN element excision controlling factor protein	0.336661	-1.57063	1.12143e-08
cce_2417	probable mrr restriction system protein	1.55876	0.640403	1.58061e-07
cce_2418	hypothetical protein; contains a DNA polymerase, beta-like region domain	1.74119	0.80007	0.000630645
cce_2419	unknown; contains a penicillin-binding protein, transpeptidase fold domain	1.69666	0.762695	9.80226e-09
cce_2420	ATP-binding protein of ABC transporter	1.1378	0.186244	0.0196864
cce_2421	unknown	0.542542	-0.882193	5.38873e-09
cce_2422	unknown	0.682856	-0.550346	0.000327357
cce_2423	hypothetical protein	0.774037	-0.369525	8.29475e-05
cce_2424	group 4 sigma-70 RNA polymerase sigma factor H; sigH	0.729845	-0.454337	0.000374836
cce_2426	unknown; contains ErfK/YbiS/YcfS/YnhG domains	0.369162	-1.43767	8.60359e-09
cce_2427	hypothetical protein; contains a Mo-dependent nitrogenase, C-terminal domain	1.3839	0.468743	0.000275491
cce_2429	conserved hypothetical protein	0.851077	-0.232638	0.0356546
cce_2430	peptide methionine sulfoxide reductase; msrA2	1.64993	0.722402	2.636e-05
cce_2431	unknown; contains DUF389	1.27771	0.353566	0.0367478
cce_2432	hypothetical protein	0.263	-1.92687	1.35348e-07
cce_2433	carbon dioxide concentrating mechanism protein; ccmK4	1.18497	0.244854	0.00166226
cce_2434	carbon dioxide concentrating mechanism protein; ccmK3	1.15225	0.204457	0.0157767
cce_2435	unknown; contains DUF323	0.743925	-0.426772	4.95304e-07
cce_2436	unknown	1.82442	0.86744	7.3462e-05
cce_2437	hypothetical protein; contains a HAD-superfamily hydrolase subfamily IIB domain	0.706289	-0.501669	0.000277177
cce_2439	hypothetical protein; contains a TrkA-N domain	0.467524	-1.09689	0.00126351
cce_2440	hypothetical protein	0.406845	-1.29745	3.42095e-06
cce_2441	hypothetical protein	0.167563	-2.57723	1.56271e-07
cce_2442	hypothetical protein	0.691983	-0.531191	0.00173105
cce_2443	hypothetical protein	0.640842	-0.641961	8.80732e-05
cce_2444	ThiamineS-like protein	0.825532	-0.276605	0.0306504
cce_2445	hypothetical protein	2.33931	1.22608	2.92588e-07
cce_2447	permease protein of sugar ABC transporter	1.49848	0.583497	0.00472569
cce_2448	putative chromosome partitioning protein, ParA family	1.4283	0.514297	2.02664e-07
cce_2449	unknown; contains a glycoside hydrolase, family 57 domain	1.7211	0.783335	1.26279e-06
cce_2451	unknown	0.404097	-1.30723	7.81887e-08
cce_2452	UPF0187-containing protein	0.766866	-0.382953	0.00414165
cce_2453	penicillin-binding protein 1A	0.844873	-0.243194	0.03089
cce_2454	phosphoglycerate mutase; gpmB	3.93969	1.97808	1.83503e-11
cce_2455	conserved hypothetical protein	1.27738	0.35319	0.0127984
cce_2458	conserved hypothetical protein	1.7747	0.827572	2.08147e-07
cce_2463	hypothetical protein	0.888234	-0.170988	0.00960128
cce_2464	Hsp70-like protein	1.39116	0.476293	5.06182e-05
cce_2467	N-acetylmuramoyl-L-alanine amidase; amiA2	1.47829	0.563933	2.44043e-08
cce_2468	Na+/H+ antiporter	1.73882	0.798105	1.3475e-06
cce_2469	unknown; contains DUF820	0.798967	-0.323792	0.000209023
cce_2471	putative adenine specific DNA methyltransferase	1.17962	0.23832	0.0173704
cce_2472	unknown; contains a beta-Ig-H3/fasciclin domain	1.39678	0.482101	0.000460068
cce_2477	putative tRNA (guanosine-2'-O-)-methyltransferase	0.656146	-0.607912	5.4991e-10
cce_2478	unknown; contains a FAD dependent oxidoreductase domain	1.66873	0.738749	6.13254e-05
cce_2479	hypothetical protein; contains a NADPH-dependent FMN reductase domain	1.20884	0.273624	0.014218
cce_2481	unknown	0.651204	-0.618819	1.73113e-07
cce_2482	putative 3-hydroxyacid dehydrogenase	0.813877	-0.297118	0.00434195
cce_2484	hypothetical protein	2.49235	1.31751	1.34642e-08
cce_2485	photosystem II D2 protein; psbD2	2.36501	1.24184	2.8246e-09
cce_2487	hypothetical protein	0.79887	-0.323967	0.00199068
cce_2488	alginate O-acetylation protein / membrane bound O-acyl transferase, MBOAT	0.919557	-0.120988	0.0385376
cce_2489	hypothetical protein	0.85574	-0.224756	0.0281879
cce_2490	conserved hypothetical protein	2.03277	1.02345	0.000122731
cce_2491	hypothetical protein	0.602372	-0.731272	6.37431e-07
cce_2493	hypothetical protein; contains a DNA repair protein RadC fragment	0.24926	-2.00427	3.76799e-06
cce_2495	DNA repair protein radC	0.697131	-0.520499	0.00182248
cce_2496	probable metallothionein; smtA	0.680989	-0.554296	1.44897e-07
cce_2499	probable sodium/galactoside symporter protein	1.7152	0.77838	5.16436e-07
cce_2500	hypothetical protein; contains a radical SAM domain	0.860362	-0.216984	0.0015254
cce_2501	conserved hypothetical protein	0.848687	-0.236696	0.0281446
cce_2505	two-component hybrid sensor and regulator	0.748146	-0.418608	0.00154354
cce_2506	unknown	0.700395	-0.51376	3.66628e-05
cce_2509	two-component hybrid sensor and regulator	1.42914	0.515146	0.00108042
cce_2511	hypothetical protein	0.774952	-0.367821	0.00757648
cce_2512	unknown; contains an aldo/keto reductase domain	1.34134	0.42368	0.00785647
cce_2513	hypothetical protein	1.61569	0.692152	0.000464372
cce_2514	hypothetical protein	0.14105	-2.82572	2.50584e-09
cce_2515	Carotenoid oxygenase	1.52962	0.613177	0.000760863
cce_2516	DUF218-containing protein	0.614338	-0.702895	1.12976e-07
cce_2517	conserved hypothetical protein	1.68828	0.755557	1.14149e-08
cce_2519	conserved hypothetical protein	1.2546	0.327224	0.00831396
cce_2520	hypothetical protein; contains DUF565	1.21207	0.277477	0.00132237
cce_2521	unknown	1.32727	0.40846	4.46565e-06
cce_2524	unknown; contains a methyltransferase type 11 domain	1.42187	0.507788	1.56781e-06
cce_2525	bacterial stress protein	1.51859	0.602736	5.72621e-06
cce_2526	bacterial stress protein	1.92011	0.941192	4.69315e-05
cce_2528	unknown	1.42899	0.514996	5.22587e-07
cce_2530	hypothetical protein	0.266171	-1.90957	5.12141e-07
cce_2532	unknown	0.654615	-0.61128	0.00898212
cce_2535	OxPPCycle protein; opcA	1.09454	0.130323	0.0437069
cce_2538	unknown; contains a peptidase M48, Ste24p domain	1.37452	0.458926	0.00202093
cce_2539	K+ channel protein	1.57104	0.651716	1.8348e-05
cce_2541	hypothetical protein	1.41361	0.499388	0.0314121
cce_2542	hypothetical protein; contains a serralysin-like metalloprotease, C-terminal domain	0.883887	-0.178066	0.0191097
cce_2543	hypothetical protein	3.00778	1.5887	1.01178e-10
cce_2544	RND multidrug efflux transporter	1.96714	0.976103	2.25089e-07
cce_2546	probable two-component sensor histidine kinase	1.50145	0.586352	0.000201199
cce_2547	4'-phosphopantetheinyl transferase	0.576467	-0.79469	2.72352e-05
cce_2549	glucose-1-phosphate thymidylyltransferase; rfbA	1.33761	0.419655	0.00046603
cce_2551	C-5 cytosine-specific DNA methylase	1.49067	0.575963	0.00161555
cce_2553	hypothetical protein	1.18227	0.241564	0.035137
cce_2554	hypothetical protein	1.17776	0.236049	0.00556889
cce_2555	putative short-chain dehydrogenase/reductase SDR	1.21841	0.285	0.00549146
cce_2556	hypothetical protein	0.54514	-0.875302	0.000129667
cce_2557	phosphonate ABC transporter, ATP-binding protein; phnC	1.36961	0.453762	8.3484e-08
cce_2559	phosphonate ABC transporter, permease protein; phnE	0.755459	-0.404574	0.0362973
cce_2561	unknown	0.491583	-1.02449	4.18181e-08
cce_2563	unknown	0.482184	-1.05234	8.68239e-08
cce_2567	hypothetical protein; contains an Armadillo-like helical domain	0.431449	-1.21274	4.52989e-07
cce_2569	DUF445-containing protein	1.57458	0.654968	0.00157799
cce_2571	unknown	0.752361	-0.410504	0.0116986
cce_2574	hypothetical protein	0.117904	-3.08432	1.24936e-09
cce_2575	hypothetical protein	1.41431	0.5001	0.00777044
cce_2576	hypothetical protein; contains DUF820	1.51019	0.594731	0.00148117
cce_2577	hypothetical protein; contains an alpha/beta hydrolase fold-1 domain	0.56106	-0.833774	0.0168042
cce_2578	translation initiation factor IF-3; infC1	0.481285	-1.05504	8.09748e-08
cce_2579	hypothetical protein	0.633471	-0.658649	1.77449e-08
cce_2580	probable flavoprotein	1.10849	0.148598	0.0262397
cce_2581	putative HicA protein	0.801637	-0.31898	0.00513988
cce_2582	putative HicB protein	0.630401	-0.665659	0.000248974
cce_2583	hypothetical protein; contains DUF29	0.349349	-1.51726	8.642e-06
cce_2586	hypothetical protein	0.604344	-0.726557	0.000172996
cce_2587	DNA methylase N-4/N-6	0.703022	-0.508359	2.00755e-06
cce_2588	unknown	0.454514	-1.1376	9.65345e-07
cce_2590	hypothetical protein	0.359718	-1.47506	6.84994e-06
cce_2591	2-amino-4-hydroxy-6-hydroxymethyldihydropteridine pyrophosphokinase; folK	0.670994	-0.575628	0.00313153
cce_2592	NUDIX hydrolase	0.588355	-0.765241	6.76812e-05
cce_2594	unknown	0.763799	-0.388734	0.00180913
cce_2595	unknown; contains DSBA oxidoreductase and Thioredoxin fold domains	1.20202	0.265466	0.00021471
cce_2596	hypothetical protein; contains a Lipolytic enzyme, G-D-S-L domain	1.36519	0.449107	0.000688268
cce_2597	hypothetical protein	1.38939	0.474455	3.27099e-07
cce_2598	stationary-phase survival protein; surE2	1.33846	0.420573	8.26558e-05
cce_2600	nicotinate-nucleotide pyrophosphorylase; nadC	1.20444	0.268368	0.0230749
cce_2602	hypothetical protein	1.29494	0.372888	0.000381946
cce_2603	hypothetical protein	1.7253	0.786848	3.75606e-05
cce_2605	aminotransferase, class I and II	1.99785	0.998447	4.59048e-10
cce_2606	cation-transporting ATPase	2.03513	1.02512	8.71349e-07
cce_2607	putative L-cysteine/cystine lyase	1.52896	0.612555	0.00271648
cce_2610	probable glycerol-3-phosphate dehydrogenase; glpD	1.58613	0.66551	5.93544e-08
cce_2611	hypothetical protein; contains PAS, GGDEF, Response regulator receiver, and GAF domains	1.99812	0.99864	5.20992e-07
cce_2612	protease IV, 67K long form; sppA2	1.48574	0.571185	0.00229128
cce_2614	unknown; contains DUF552	0.904044	-0.145535	0.0188155
cce_2616	sugar fermentation stimulation protein; sfsA	1.29914	0.37756	0.00214903
cce_2617	unknown; contains DUF900, hydrolase-like	2.20391	1.14006	5.50862e-09
cce_2619	ABC transporter, substrate binding protein, possibly oligopeptides	1.25129	0.323419	0.0183648
cce_2620	hypothetical protein	1.58424	0.663795	0.0343086
cce_2623	GTP-binding protein; era	2.1018	1.07163	2.38975e-09
cce_2624	CheA-like two-component hybrid sensor and regulator	1.51297	0.597384	4.55658e-08
cce_2625	photosystem II 12 kD extrinsic protein; psbU	1.47359	0.559337	2.79562e-08
cce_2626	unknown	0.587379	-0.767636	9.50173e-05
cce_2628	unknown; contains DUF820	1.42455	0.510508	0.000463661
cce_2629	unknown; contains TPR_1 tetratricopeptide repeat domains	1.71372	0.777135	4.18299e-05
cce_2630	uracil phosphoribosyltransferase; upp	1.48759	0.572974	3.53774e-06
cce_2632	iron transport protein	0.135069	-2.88823	3.21602e-08
cce_2633	putative outer membrane protein	0.247711	-2.01327	6.95814e-09
cce_2634	hypothetical protein; contains an FeoA domain	0.207663	-2.26768	1.6154e-06
cce_2635	hypothetical protein; contains a cupredoxin domain	0.209159	-2.25733	7.17895e-09
cce_2636	unknown	0.501944	-0.994402	6.18866e-08
cce_2638	unknown	39.2339	5.29403	1.86453e-13
cce_2639	unknown; contains a Rhodanese-like domain	0.114187	-3.13053	9.18384e-15
cce_2640	unknown	0.657535	-0.604861	2.42354e-10
cce_2641	hypothetical protein	0.491784	-1.0239	6.02302e-05
cce_2642	circadian phase modifier CpmA-like protein	0.880218	-0.184068	0.0227732
cce_2644	hypothetical protein	1.49509	0.580236	0.00044362
cce_2645	putative dimeric alpha-beta barrel protein	0.600417	-0.735963	0.00113455
cce_2646	putative S6 modification enzyme; rimK	1.6162	0.692602	1.07733e-07
cce_2647	unknown; contains a succinylglutamate desuccinylase/aspartoacylase domain	2.25668	1.1742	3.55448e-11
cce_2648	probable lipoxygenase	2.09626	1.06782	1.26118e-09
cce_2649	unknown; contains a cytochrome P450 domain	1.88416	0.913924	4.56758e-10
cce_2650	hypothetical protein	0.301028	-1.73203	8.31716e-06
cce_2652	phycocyanin alpha subunit; cpcA	3.03077	1.59968	9.14286e-08
cce_2653	phycocyanin associated linker protein; cpcC2	4.80473	2.26445	1.10805e-11
cce_2654	phycocyanin associated linker protein; cpcC1	5.16859	2.36977	7.60668e-12
cce_2656	phycocyanin alpha phycocyanobilin lyase; cpcE	3.80206	1.92678	2.80111e-11
cce_2657	putative transketolase	2.28271	1.19075	7.49202e-12
cce_2658	glucose-1-phosphate adenylyltransferase; glgC2	1.7471	0.804964	5.6081e-07
cce_2659	short-chain dehydrogenase/reductase SDR	1.46351	0.549435	1.46483e-06
cce_2660	hypothetical protein	1.18911	0.249883	0.00691897
cce_2662	conserved hypothetical protein	0.818907	-0.288229	0.000765926
cce_2664	hypothetical protein; contains a cupin, RmlC-type domain	0.0850291	-3.5559	2.17814e-10
cce_2665	lignostilbene-alpha,beta-dioxygenase	0.71508	-0.483823	0.0152115
cce_2666	putative biopterin transport-related protein BT1	0.543078	-0.88077	1.73987e-05
cce_2668	ATP-binding protein of ABC transporter	1.51502	0.599333	2.11719e-05
cce_2669	unknown; contains a mammalian cell entry related domain	0.554942	-0.849591	2.62249e-09
cce_2670	ABC transporter ATP-binding protein; hetC	1.41219	0.497932	1.92353e-07
cce_2671	hypothetical protein	1.4016	0.487071	0.00266468
cce_2673	hypothetical protein	1.19712	0.259567	0.00742749
cce_2674	hypothetical protein	3.12664	1.64461	3.16992e-07
cce_2675	hypothetical protein	1.93293	0.950786	2.41784e-09
cce_2676	hypothetical protein	1.1429	0.192705	0.00153922
cce_2677	HetP protein; hetP	2.43569	1.28433	1.30847e-08
cce_2678	HlyD-family secretion protein	3.38868	1.76072	2.94591e-05
cce_2679	hypothetical protein	1.78618	0.836876	1.54842e-07
cce_2680	aldehyde dehydrogenase	1.1424	0.192069	0.0446842
cce_2682	hypothetical protein; contains a TRAP transporter solute receptor, TAXI family domain	0.513716	-0.960958	0.000458515
cce_2684	putative PfkB	1.39295	0.478139	0.000867284
cce_2685	putative cation efflux protein	0.694813	-0.525303	2.60944e-05
cce_2686	unknown; contains a FAD dependent oxidoreductase domain	0.536202	-0.899153	1.43913e-05
cce_2687	DNA-damage-inducible/multi antimicrobial extrusion protein; matE1	0.651559	-0.618031	0.000252792
cce_2688	hypothetical protein	1.22484	0.292588	0.0200172
cce_2689	unknown; contains a bacterial regulatory protein, MerR domain	1.28922	0.366494	0.00149815
cce_2690	DegT/DnrJ/EryC1/StrS aminotransferase family enzyme	0.724476	-0.464991	9.2008e-05
cce_2691	unknown	0.779995	-0.358462	0.0111669
cce_2692	unknown; contains a UspA domain	0.772988	-0.371481	0.00792161
cce_2696	(3R)-hydroxymyristoyl-[acyl carrier protein] dehydratase; fabZ	1.2393	0.309531	0.000737152
cce_2699	unknown	3.32214	1.73211	2.52417e-11
cce_2700	conserved hypothetical protein	0.823371	-0.280386	0.00222781
cce_2701	unknown; contains a Lambda repressor-like, DNA-binding domain	2.92267	1.54729	4.41732e-12
cce_2702	unknown	0.0777925	-3.68423	4.16726e-11
cce_2703	hydrogenase expression/formation protein; hypE	0.373666	-1.42018	7.95048e-13
cce_2704	unknown; contains DUF820	0.853513	-0.228515	0.0147991
cce_2705	probable fdxN element excision controlling factor protein; xisH2	0.317555	-1.65492	1.17212e-05
cce_2707	hypothetical protein	1.7487	0.806284	0.000600261
cce_2709	hypothetical protein	1.39227	0.477437	1.82012e-05
cce_2710	unknown	1.6793	0.747862	2.48338e-08
cce_2713	fatty acid desaturase; desC2	2.10392	1.07308	2.27264e-07
cce_2714	FAD linked oxidase	0.638693	-0.646806	0.00385308
cce_2715	UPF0001-containing protein	0.532425	-0.909349	8.67215e-07
cce_2716	unknown	0.566698	-0.819349	5.48751e-05
cce_2717	unknown; contains a radical SAM domain	0.766411	-0.383809	2.69267e-06
cce_2718	putative DoxX	0.877718	-0.188171	0.0182798
cce_2720	hypothetical protein	1.15865	0.212443	0.0358222
cce_2721	conserved hypothetical protein	0.441114	-1.18078	4.89023e-06
cce_2723	conserved hypothetical protein	1.1264	0.171714	0.00565296
cce_2727	CHP48-containing protein	0.721457	-0.471014	2.36778e-05
cce_2728	conserved hypothetical protein	0.686624	-0.542409	0.000838894
cce_2729	unknown	0.2951	-1.76072	6.94124e-13
cce_2730	hypothetical protein	0.489633	-1.03023	1.06714e-05
cce_2731	probable cyclopropane-fatty-acyl-phospholipid synthase	1.47206	0.557841	0.000107009
cce_2732	hypothetical protein	0.617033	-0.696581	2.25828e-07
cce_2734	unknown	0.836301	-0.257906	0.0369786
cce_2735	ATPase	1.59749	0.675808	1.21772e-08
cce_2737	Na+/H+ antiporter	1.16701	0.222815	0.0316755
cce_2738	hypothetical protein	1.7487	0.806284	0.000600261
cce_2740	conserved hypothetical protein	0.502758	-0.992064	7.4153e-06
cce_2742	unknown; contains TPR_1 tetratricopeptide repeat domains	0.927128	-0.10916	0.0480051
cce_2743	putative general secretion pathway protein G	0.472582	-1.08136	3.88143e-05
cce_2744	hypothetical protein; contains an excinuclease ABC, C subunit, N-terminal domain	1.7487	0.806284	0.000600261
cce_2745	hypothetical protein	1.7487	0.806284	0.000600261
cce_2746	putative DoxX family protein	2.10571	1.07431	6.53568e-08
cce_2747	hypothetical protein	1.7487	0.806284	0.000600261
cce_2748	glucose/ribitol short chain dehydrogenase/reductase family protein	0.540913	-0.886531	1.11465e-05
cce_2749	hypothetical protein	0.783929	-0.351204	0.0163338
cce_2751	conserved hypothetical protein	0.614862	-0.701664	4.26767e-05
cce_2752	putative Deoxyribodipyrimidine photolyase	1.62982	0.704716	0.000370499
cce_2753	hypothetical protein; contains DUF820	0.654397	-0.611762	1.02171e-06
cce_2754	unknown	0.892828	-0.163546	0.0351688
cce_2755	hypothetical protein; contains a TrkA-N domain	0.0773961	-3.69159	1.33808e-14
cce_2756	NH(3)-dependent NAD(+) synthetase	1.21122	0.276456	0.0182581
cce_2757	putative NUDIX hydrolase	1.14993	0.201545	0.0020706
cce_2758	nicotinate-nucleotide adenylyltransferase; nadD	1.74115	0.800042	1.84847e-06
cce_2759	putative nicotinate phosphoribosyltransferase	1.49717	0.582235	0.000673812
cce_2760	unknown; contains a von Willebrand factor, type A domain	1.64976	0.722253	7.53178e-05
cce_2761	UPF0027-containing protein	2.04196	1.02995	9.54738e-11
cce_2762	unknown; contains a lipase, class 3 domain	2.11306	1.07934	2.68992e-06
cce_2763	hypothetical protein	1.66143	0.732427	3.8889e-08
cce_2765	probable glutaminase	1.89603	0.92298	2.1576e-06
cce_2766	hypothetical protein	4.70724	2.23488	3.77294e-07
cce_2767	unknown; contains a phytoene dehydrogenase-related protein domain	1.73005	0.790816	3.914e-05
cce_2768	probable nitroreductase	2.32896	1.21969	3.26536e-09
cce_2769	Pirin-like protein	1.5433	0.626016	4.97125e-09
cce_2771	mannose-6-phosphate isomerase; manA1	0.671239	-0.575101	1.20282e-05
cce_2773	DUF952-containing protein	1.70437	0.769237	0.0187262
cce_2774	hypothetical protein; contains a mechanosensitive ion channel, MscS domain	1.40368	0.489219	1.53247e-06
cce_2775	phosphoenolpyruvate synthase	2.97476	1.57277	9.58824e-12
cce_2778	putative involved in polyketide (linear poly-beta-ketones) synthesis	0.577185	-0.792893	1.93298e-06
cce_2779	zeta-carotene desaturase; crtQ	1.87966	0.910474	2.17174e-07
cce_2781	putative NnrU protein	1.22701	0.295152	0.000773984
cce_2782	LysR family transcriptional regulator	1.32246	0.403226	0.000309285
cce_2783	histidyl-tRNA synthetase 2; hisS2	1.5953	0.67383	1.13463e-07
cce_2786	inositol monophophatase	1.55832	0.639988	0.00892394
cce_2787	hypothetical protein; contains a GGDEF domain, Forkhead-associated domain, EAL domain, and SMAD/FHA domain	0.729807	-0.454413	0.0300374
cce_2788	hypothetical protein; contains a GGDEF domain, Forkhead-associated domain, EAL domain, and SMAD/FHA domain	0.575222	-0.797808	0.00477718
cce_2789	pyridoxal phosphate biosynthetic protein; pdxA	1.63208	0.706714	1.33453e-06
cce_2792	photosystem II 13 kD protein; psb28-2	0.869424	-0.201868	0.00242832
cce_2794	hypothetical protein; contains UPF0016	1.20448	0.268405	0.000723791
cce_2795	hypothetical protein	0.347905	-1.52324	1.0375e-05
cce_2796	conserved hypothetical protein	0.476592	-1.06917	1.46931e-08
cce_2798	conserved hypothetical protein	0.193758	-2.36767	4.6829e-05
cce_2799	glycosyl transferase	0.325711	-1.61833	4.26787e-06
cce_2800	glycosyl transferase, group 1	0.487545	-1.03639	2.28816e-07
cce_2801	ABC transporter, ATP-binding protein	0.693491	-0.52805	0.00111738
cce_2802	hypothetical protein; contains a Protein kinase-like domain	0.419156	-1.25444	1.38312e-10
cce_2804	amidase enhancer; lytB	1.25137	0.323509	0.0113687
cce_2805	hypothetical protein	1.30119	0.379836	0.0280633
cce_2806	hypothetical protein; contains a cyclic nucleotide-binding domain and a winged helix repressor DNA-binding domain	0.297103	-1.75096	3.48321e-13
cce_2808	hypothetical protein	1.51625	0.600508	0.0079936
cce_2809	hypothetical protein; contains a cyclic nucleotide-binding domain and a winged helix repressor DNA-binding domain	0.633847	-0.657794	0.000183719
cce_2810	tRNA-i(6)A37 modification enzyme MiaB; miaB	0.898055	-0.155125	0.0143343
cce_2811	hypothetical protein	1.8737	0.905888	5.94122e-05
cce_2812	ATP synthase epsilon subunit; atpE	2.26092	1.17691	3.93743e-09
cce_2814	conserved hypothetical protein	0.626717	-0.674114	9.22371e-05
cce_2815	conserved hypothetical protein	1.68324	0.751239	1.79428e-05
cce_2817	hypothetical protein; contains an alpha/beta hydrolase fold-1	0.718213	-0.477515	0.013882
cce_2818	conserved hypothetical protein	0.741433	-0.431611	0.0312915
cce_2820	hypothetical protein; contains a metallophosphoesterase domain	0.74086	-0.432727	7.5456e-06
cce_2821	unknown; contains a UspA domain	1.51755	0.601745	2.3581e-07
cce_2822	serine/threonine protein kinase	1.26978	0.344575	0.0236733
cce_2823	conserved hypothetical protein	1.52846	0.612078	6.17301e-06
cce_2824	UPF0075-containing protein	1.44068	0.526746	6.71634e-05
cce_2825	unknown	1.73919	0.798413	3.43685e-06
cce_2826	recombination protein; recR	1.29415	0.372006	0.000290509
cce_2827	hypothetical protein; contains a Lambda repressor-like, DNA-binding domain	2.40484	1.26594	1.87603e-07
cce_2830	hypothetical protein	0.773746	-0.370068	0.00103287
cce_2831	hypothetical protein; contains DUF497	0.673728	-0.569763	0.000435664
cce_2832	DUF559-containing protein	0.691604	-0.531981	0.0028258
cce_2835	hypothetical protein; contains UPF0150	0.689751	-0.535853	4.18884e-05
cce_2837	hypothetical protein	1.25021	0.322168	0.000540074
cce_2839	hypothetical protein	1.7487	0.806284	0.000600261
cce_2840	putative HofG-like general secretion pathway protein	1.99814	0.998658	2.15052e-08
cce_2841	unknown	0.726911	-0.46015	0.00167963
cce_2842	hypothetical protein	0.679506	-0.557442	3.20713e-06
cce_2843	hypothetical protein	1.12348	0.167976	0.00901479
cce_2844	hypothetical protein; contains a DNA polymerase, beta-like region domain	0.471574	-1.08444	9.3316e-06
cce_2845	hypothetical protein	1.62618	0.701487	2.95253e-06
cce_2846	hypothetical protein	0.588583	-0.764683	8.29395e-05
cce_2847	hypothetical protein; contains UPF0150	0.809636	-0.304655	0.00401206
cce_2848	hypothetical protein; contains a YcfA domain	0.833903	-0.262048	0.0307042
cce_2851	hypothetical protein; contains a Ribbon-helix-helix domain	1.20471	0.268686	0.000117783
[truncated: 1,767 more rows]
