# Supplementary material for: Genome-Scale Modeling of Light-Driven Reductant Partitioning and Carbon Fluxes in Diazotrophic Unicellular Cyanobacterium Cyanothece sp. ATCC 51142
Source: PLoS Comput Biol. 2012 Apr 5;8(4):e1002460. doi: 10.1371/journal.pcbi.1002460 (PMC3329150; doi:10.1371/journal.pcbi.1002460)
Supplement: Table S8 — Proteomic data. Protein expression levels measured in light-limited and ammonia-limited chemostats. (XLSX) [file pcbi.1002460.s012.xlsx]

## Sheet: Table S8
Table S8. Proteomic data
GI	Locus	Protein Description	AL_R1	AL_R2	AL_R3	AL_R4	LL_R1	LL_R2	LL_R3	LL_R4	AMT Peptide Count	q-value	MeanAL	MeanLL	MeanLL-MeanAL	fold change	P-value (ANOVA)
gi|172034936	cce_0019	unknown	23.9142	23.3778	23.4741	23.8793	23.8383	23.659	23.7682	23.7371	12	0.191	23.6613	23.7507	0.0893216	1.06387	0.554
gi|172034939	cce_0022	unknown	22.3499	23.3	23.1867	22.6704	24.405	24.1133	24.1242	23.7285	2	0.00314	22.8767	24.0927	1.21599	2.32299	0.00357
gi|172034961	cce_0044	putative GDP-L-fucose synthase	21.4341	21.0938	21.7284	21.6763	20.2435	20.8574	20.0079	21.0898	2	0.0122	21.4832	20.5497	-0.933501	0.523586	0.0187
gi|172034981	cce_0064	N-acetyl-gamma-glutamyl-phosphate reductase	23.8952	23.7234	23.8501	23.4878	23.8334	23.8545	23.5891	23.1486	10	0.181	23.7392	23.6064	-0.132739	0.912098	0.506
gi|172034990	cce_0073	unknown	25.4502	25.4428	25.6432	25.6122	25.5114	25.4831	25.3314	24.973	4	0.0718	25.5371	25.3247	-0.212382	0.863111	0.165
gi|172034994	cce_0077	5-methyltetrahydrofolate--homocysteine methyltransferase	20.2487	20.7547	20.3847	20.4752	20.8396	20.6431	20.5797	20.2569	2	0.181	20.4658	20.5798	0.114033	1.08225	0.507
gi|172034998	cce_0081	30S ribosomal protein S14	23.9473	24.3012	24.5648	23.8495	24.5101	24.3118	24.9902	24.0342	6	0.119	24.1657	24.4616	0.295867	1.22762	0.299
gi|172035019	cce_0102	RNA-binding protein	26.7308	26.8039	26.7208	26.9276	26.6793	26.5863	26.7661	26.6685	10	0.0437	26.7957	26.675	-0.120702	0.91974	0.0918
gi|172035020	cce_0103	ribose 5-phosphate isomerase	25.7732	25.7227	25.7123	25.4804	26.7728	26.8311	26.7105	26.6586	16	4.15e-05	25.6722	26.7433	1.07111	2.10105	7.53e-06
gi|172035030	cce_0113	putative transport protein	23.955	24.1675	24.0503	23.9566	24.9946	24.8698	24.7776	24.7245	15	0.000139	24.0323	24.8416	0.809299	1.75236	4.57e-05
gi|172035032	cce_0115	response regulator	19.1234	20.2843	20.0487	20.1017	21.2733	20.9258	20.361	20.0319	2	0.0442	19.8895	20.648	0.758496	1.69173	0.0937
gi|172035037	cce_0120	unknown	18.1515	18.6807	17.5469	19.4006	19.2238	18.9767	19.3525	18.7962	2	0.0737	18.4449	19.0873	0.642385	1.56091	0.171
gi|172035038	cce_0121	unknown	20.1251	20.3125	20.6173	20.0897	21.8053	21.1434	21.4502	21.7624	2	0.000898	20.2861	21.5403	1.25417	2.3853	0.000683
gi|172035052	cce_0135	putative rehydrin	28.669	28.6955	28.7855	28.5548	29.4353	29.1007	29.4848	29.5505	19	0.00087	28.6762	29.3929	0.716648	1.64336	0.000651
gi|172035053	cce_0136	50S ribosomal protein L28	24.8152	24.6354	24.4462	24.4719	24.4583	24.7282	24.8515	24.8641	12	0.131	24.5922	24.7255	0.133309	1.09681	0.335
gi|172035061	cce_0144	aminopeptidase N	20.6775	20.4397	21.4234	21.6763	18.1634	20.2087	20.4089	21.0575	5	0.0716	21.0542	19.9596	-1.09465	0.468251	0.165
gi|172035063	cce_0146	RNA-binding protein	21.1245	21.1025	21.0455	20.9535	21.068	20.2115	20.601	20.6715	4	0.0301	21.0565	20.638	-0.418484	0.74821	0.0586
gi|172035064	cce_0147	unknown	25.067	25.0532	25.3337	25.269	25.2549	25.2415	25.1281	25.1622	6	0.261	25.1808	25.1967	0.0158966	1.01108	0.844
gi|172035072	cce_0155	light repressed protein	22.7933	22.9157	22.7872	23.0914	24.153	24.3156	24.0033	23.7761	10	0.000286	22.8969	24.062	1.16511	2.2425	0.000133
gi|172035089	cce_0172	glutamate-1-semialdehyde aminomutase	25.3919	25.3064	25.3801	25.382	26.3058	26.0988	26.271	26.2431	20	1.94e-05	25.3651	26.2297	0.86457	1.8208	2.28e-06
gi|172035090	cce_0173	putative methionine sulfoxide reductase B	23.4019	23.3641	23.4546	23.4013	22.8117	23.0034	23.2478	22.6335	2	0.00797	23.4055	22.9241	-0.481365	0.716299	0.0111
gi|172035091	cce_0174	glutathione S-transferase	24.7314	24.7725	24.9303	24.8724	24.3978	24.2212	24.1986	24.3611	11	0.000401	24.8267	24.2947	-0.531959	0.691615	0.000219
gi|172035115	cce_0199	magnesium chelatase, ATPase subunit I	24.5031	24.2838	24.341	24.1751	23.557	23.4448	23.6303	23.5858	12	0.000168	24.3258	23.5545	-0.771283	0.585896	6.64e-05
gi|172035117	cce_0201	peptidase, S9C	19.63	19.8839	20.2012	19.7256	14.465	14.465	14.465	14.465	2	5.94e-06	19.8602	14.465	-5.39517	0.0237626	2.56e-07
gi|172035126	cce_0210	cysteine synthase	23.2974	22.9488	22.9955	23.1735	22.9142	23.0774	23.1356	22.4959	4	0.111	23.1038	22.9058	-0.19803	0.87174	0.276
gi|172035129	cce_0213	unknown	20.6285	20.5311	20.3753	20.1675	19.7535	19.1242	20.039	20.2566	2	0.0285	20.4256	19.7933	-0.632277	0.645157	0.0546
gi|172035133	cce_0217	30S ribosomal protein S4	26.0923	26.0934	26.0286	26.1471	26.0291	25.9493	26.0323	26.0405	14	0.028	26.0903	26.0128	-0.0775487	0.947666	0.0531
gi|172035135	cce_0219	30S ribosomal protein S1	25.9333	25.8762	25.8817	25.9481	25.5287	25.3501	25.4617	25.5945	26	0.000426	25.9098	25.4838	-0.426062	0.74429	0.000248
gi|172035139	cce_0223	50S ribosomal protein L7/L12	29.4417	29.5229	29.2229	29.5339	28.5529	28.518	29.0508	29.3168	21	0.0191	29.4304	28.8596	-0.570739	0.673272	0.0335
gi|172035140	cce_0224	50S ribosomal protein L10	27.0039	26.9796	27.0468	27.3179	27.1041	27.0226	26.9986	27.3318	11	0.254	27.0871	27.1143	0.0272231	1.01905	0.811
gi|172035141	cce_0225	50S ribosomal protein L1	26.0089	25.8526	25.9252	25.8981	25.2853	25.4842	25.3844	25.6434	17	0.00134	25.9212	25.4493	-0.471897	0.721016	0.00129
gi|172035142	cce_0226	50S ribosomal protein L11	28.1976	28.1625	28.1148	28.0191	27.9624	27.8663	27.6918	27.9178	6	0.00725	28.1235	27.8596	-0.263912	0.832827	0.00977
gi|172035143	cce_0227	transcription antitermination protein	23.3322	23.0824	23.4528	23.2888	23.4414	22.925	23.1161	22.7408	9	0.0901	23.2891	23.0558	-0.233251	0.850715	0.215
gi|172035147	cce_0231	putative RNA polymerase, omega subunit	25.1711	24.9579	24.8482	25.2114	24.5051	24.6037	24.9101	24.8811	5	0.0273	25.0472	24.725	-0.322181	0.79986	0.0514
gi|172035148	cce_0232	L-argininosuccinate lyase	23.99	23.8765	24.0231	23.8435	23.1911	23.0792	22.7467	23.2288	10	0.000507	23.9333	23.0614	-0.871813	0.54646	0.000314
gi|172035151	cce_0235	unknown	22.5794	22.6305	22.3659	23.6517	23.9904	23.8356	23.7248	24.1466	4	0.00739	22.8069	23.9244	1.11747	2.16966	0.01
gi|172035156	cce_0240	UDP-N-acetylmuramoylalanine-D-glutamate ligase	19.5361	19.1514	18.8969	19.3666	20.3154	20.3215	19.3745	20.2522	2	0.0139	19.2378	20.0659	0.828113	1.77536	0.0218
gi|172035158	cce_0242	glycosyl transferase, group 1	15.8177	14.465	14.465	15.7384	17.3868	17.6588	17.8547	18.1602	2	0.167	15.1215	17.7651	2.64359	6.24883	0.456
gi|172035160	cce_0244	unknown	18.6271	19.8857	18.9382	18.9796	21.4931	21.5435	20.9006	20.567	6	0.0014	19.1076	21.126	2.01842	4.05139	0.00137
gi|172035162	cce_0246	putative DNA-binding protein, starvation-inducible	25.7754	25.6637	25.6989	25.5298	24.0114	24.0535	24.28	24.1819	9	1.37e-05	25.6669	24.1317	-1.53523	0.345025	1.29e-06
gi|172035171	cce_0255	unknown	24.5604	24.9312	25.2276	24.5003	24.8171	24.9519	25.295	25.0842	5	0.115	24.8049	25.0371	0.232167	1.1746	0.286
gi|172035183	cce_0267	photosystem II D1 protein	26.141	26.1927	26.3047	25.7896	27.3451	27.0628	26.9675	27.1136	4	0.000507	26.107	27.1222	1.01523	2.02123	0.000312
gi|172035184	cce_0268	putative HAD-superfamily phosphatase subfamily IIIA protein	23.143	23.565	23.2048	23.1894	23.8952	23.3068	23.1892	23.9317	3	0.0882	23.2755	23.5807	0.305177	1.23557	0.209
gi|172035186	cce_0270	unknown	20.0995	20.1341	19.7832	20.4408	21.7911	22.1785	22.1485	22.2686	2	8.73e-05	20.1144	22.0967	1.98228	3.95118	2.45e-05
gi|172035192	cce_0276	ATP-binding protein of sugar ABC transportor	21.2858	21.2064	21.2654	21.0599	20.2951	19.9404	20.3239	20.3406	2	0.000233	21.2044	20.225	-0.979389	0.507195	0.000101
gi|172035193	cce_0277	ribonuclease E	25.2087	25.2781	25.1357	25.2914	25.6266	25.4638	25.8664	25.4758	18	0.00688	25.2285	25.6082	0.379679	1.30105	0.00913
gi|172035198	cce_0282	imidazole glycerol phosphate synthase, cyclase subunit	20.8464	21.1096	20.9874	21.1914	19.9499	14.465	19.6371	19.2863	4	0.193	21.0337	18.3346	-2.6991	0.153989	0.563
gi|172035200	cce_0284	glutamyl-tRNA (Gln) amidotransferase subunit C	23.4723	23.7935	23.6101	23.839	23.7339	23.5805	23.8534	23.8177	2	0.187	23.6787	23.7464	0.0676339	1.048	0.54
gi|172035201	cce_0285	photosystem I assembly related protein	19.0053	19.7367	19.3163	18.856	19.7413	20.1116	20.0584	20.1157	2	0.00786	19.2286	20.0068	0.778162	1.71494	0.0109
gi|172035205	cce_0289	two-component response regulator	23.9248	23.8243	23.6259	24.0337	23.8741	23.8004	24.0825	23.9243	4	0.188	23.8522	23.9203	0.068146	1.04837	0.541
gi|172035206	cce_0290	30S ribosomal protein S21	25.1791	25.0449	25.326	25.1706	24.6744	24.5101	24.68	25.0927	5	0.0119	25.1802	24.7393	-0.440854	0.736698	0.0181
gi|172035208	cce_0292	pyruvate dehydrogenase E1 component alpha subunit	24.7059	24.6739	24.5512	24.3597	24.3519	24.5318	24.6274	24.0239	15	0.108	24.5727	24.3838	-0.188931	0.877256	0.267
gi|172035209	cce_0293	aspartate-semialdehyde dehydrogenase, USG-1 related	24.5134	24.4693	24.3045	24.2222	24.1708	24.0624	24.1303	24.185	12	0.0115	24.3774	24.1371	-0.240244	0.846602	0.0174
gi|172035210	cce_0294	dihydrodipicolinate synthase	21.1081	21.4022	21.734	20.8697	21.1217	21.3142	20.8123	20.5175	4	0.0971	21.2785	20.9414	-0.337071	0.791647	0.236
gi|172035211	cce_0295	CHP_MG423-containing protein	22.331	22.3942	22.1474	22.7161	22.2909	25.3599	22.9088	22.3612	5	0.119	22.3972	23.2302	0.833036	1.78143	0.299
gi|172035213	cce_0297	two-component sensor histidine kinase	21.4397	21.3151	20.7302	21.2314	20.6919	20.8786	20.5354	20.5071	5	0.0153	21.1791	20.6533	-0.525833	0.694558	0.0252
gi|172035214	cce_0298	two-component response regulator	23.4537	23.4755	23.2935	23.796	21.7572	21.6545	21.8478	21.9007	8	4.02e-05	23.5047	21.7901	-1.71461	0.304684	6.77e-06
gi|172035223	cce_0307	bifunctional glycine oxidase/thiamine biosynthesis protein	23.4503	23.9312	24.2733	23.6724	24.3341	24.1889	24.1147	24.2717	5	0.0367	23.8318	24.2273	0.395542	1.31544	0.0743
gi|172035225	cce_0309	imidazole glycerol phosphate synthase subunit	21.3423	20.9137	21.1268	21.6315	19.903	20.7216	21.1332	18.8327	2	0.0397	21.2536	20.1476	-1.10592	0.464607	0.082
gi|172035229	cce_0313	putative extracellular solute-binding protein, family 3	22.1117	22.0875	22.0136	22.2361	23.2739	23.1882	23.2372	23.1544	9	1.06e-05	22.1122	23.2134	1.10121	2.14535	8.32e-07
gi|172035231	cce_0315	magnesium-protoporphyrin O-methyltransferase	22.5658	22.4429	22.5106	22.9179	22.6728	22.7175	22.9255	23.36	6	0.0674	22.6093	22.9189	0.309641	1.2394	0.153
gi|172035232	cce_0316	probable serin-threonin phosphatase	24.2807	24.3718	24.6198	24.5408	24.5651	24.3532	24.4114	23.9854	9	0.157	24.4532	24.3288	-0.124477	0.917336	0.424
gi|172035233	cce_0317	unknown	20.4192	20.5115	19.7785	20.5527	21.2387	21.4183	21.478	21.4707	2	0.0013	20.3155	21.4014	1.08594	2.12275	0.00123
gi|172035234	cce_0318	unknown	25.2197	25.3645	25.1306	25.299	24.2868	24.1917	24.3557	24.0606	10	6.61e-05	25.2534	24.2237	-1.02973	0.489801	1.5e-05
gi|172035235	cce_0319	putative S-layer OprB family carbohydrate-selective porin	19.9602	14.465	19.8137	18.958	20.5339	20.2199	20.358	20.6448	6	0.29	18.2992	20.4391	2.13992	4.40739	0.978
gi|172035236	cce_0320	light-dependent protochlorophyllide reductase	23.766	23.5154	23.8307	24.0309	24.1341	24.0586	23.8561	24.0477	6	0.0459	23.7857	24.0241	0.238405	1.17969	0.0978
gi|172035252	cce_0336	mannose-1-phosphate guanyltransferase	22.4283	22.3824	22.6183	22.2931	23.3582	23.0243	23.2257	22.9085	7	0.0013	22.4306	23.1292	0.698618	1.62295	0.00122
gi|172035254	cce_0338	probable acylneuraminate cytidylyltransferase	20.323	20.6917	18.3527	19.39	14.465	14.465	14.465	20.2941	2	0.0136	19.6894	15.9223	-3.76709	0.0734503	0.0212
gi|172035256	cce_0340	unknown	21.7901	21.4935	20.2591	20.3157	21.0887	21.964	21.8491	21.2407	6	0.103	20.9646	21.5356	0.570987	1.48554	0.253
gi|172035257	cce_0341	putative band 7 protein, cation conductance	30.3092	29.8794	29.5962	30.353	28.8906	28.9271	28.4711	28.301	7	0.00123	30.0344	28.6475	-1.38698	0.382364	0.00113
gi|172035281	cce_0365	histidine triad family protein	22.7857	22.4143	23.2536	23.4566	21.611	22.2559	22.8179	23.5676	2	0.156	22.9776	22.5631	-0.414502	0.750278	0.419
gi|172035286	cce_0370	protease	21.2388	21.4458	20.8718	20.6716	22.1247	22.3827	22.1142	20.8918	2	0.036	21.057	21.8783	0.821332	1.76704	0.0725
gi|172035295	cce_0379	putative methyltransferase	23.1463	23.0279	23.1983	23.2653	24.111	23.9092	23.7183	23.8019	13	0.000516	23.1595	23.8851	0.725669	1.65367	0.000321
gi|172035310	cce_0394	glycoside hydrolase family 13, putative neopullulanase	20.2526	20.2565	20.3983	20.3173	20.5775	20.3668	20.5384	20.5215	5	0.0101	20.3062	20.501	0.194875	1.14463	0.0147
gi|172035311	cce_0395	nitrilase/cyanide hydratase and apolipoprotein N-acyltransferase	20.757	19.6033	20.876	21.2189	20.5562	20.7053	20.4798	19.8549	2	0.205	20.6138	20.3991	-0.214746	0.861698	0.609
gi|172035312	cce_0396	fumarate hydratase	21.276	20.9572	21.2646	21.482	19.7578	20.4074	20.8467	20.5551	2	0.0105	21.2449	20.3918	-0.853169	0.553567	0.0153
gi|172035315	cce_0399	probable ABC transporter periplasmic branched chain amino acid binding protein	23.2676	23.3004	23.3768	23.4495	24.095	24.2551	24.0984	24.2623	13	5.53e-05	23.3486	24.1777	0.829118	1.7766	1.08e-05
gi|172035321	cce_0405	putative 3-hydroxyisobutyrate dehydrogenase	14.465	18.9525	19.0453	19.7315	18.6256	19.7257	19.1283	18.2989	2	0.108	18.0486	18.9446	0.896036	1.86095	0.266
gi|172035330	cce_0414	RND multidrug efflux transporter	18.4023	18.8456	18.3396	18.6794	18.4932	17.9231	18.3398	17.3047	2	0.0493	18.5667	18.0152	-0.551495	0.682313	0.107
gi|172035342	cce_0426	phosphoribosylglycinamide formyltransferase	21.6096	21.8296	22.0496	21.6188	19.7719	20.0738	19.9504	19.9279	2	3.4e-05	21.7769	19.931	-1.84592	0.278178	5.05e-06
gi|172035357	cce_0441	photosystem II 22 kD protein	22.8345	22.8208	22.6901	22.7352	22.3367	22.5653	22.5035	22.7651	10	0.0281	22.7702	22.5427	-0.227492	0.854118	0.0537
gi|172035365	cce_0449	unknown	20.8015	21.1174	21.3747	21.3614	21.4132	21.3824	21.4256	21.2262	6	0.0895	21.1637	21.3618	0.1981	1.14719	0.213
gi|172035369	cce_0453	putative transcriptional regulator AbrB	27.1496	27.2383	27.2934	27.352	26.3972	26.4909	26.6863	26.7875	10	0.00074	27.2583	26.5905	-0.667813	0.62946	0.000516
gi|172035372	cce_0456	thioredoxin-like protein	23.0329	22.7618	22.7503	23.1552	21.7043	21.9153	22.0248	22.695	3	0.00851	22.925	22.0848	-0.840211	0.558562	0.012
gi|172035376	cce_0460	enoyl-[acyl-carrier-protein] reductase	25.8047	25.8536	25.8505	25.7641	26.1068	25.9026	26.0666	26.1302	9	0.00463	25.8182	26.0516	0.23334	1.17555	0.0057
gi|172035377	cce_0461	nitrogen-responsive regulatory protein	21.1858	21.2563	21.7296	21.0972	20.6341	20.9599	20.1036	20.6823	3	0.0126	21.3172	20.595	-0.72226	0.606147	0.0193
gi|172035395	cce_0479	probable nutrient-stress induced DNA binding protein	27.8736	27.8451	27.9975	27.7808	26.918	26.8697	26.9689	26.8069	8	2.02e-05	27.8742	26.8909	-0.983356	0.505802	2.45e-06
gi|172035398	cce_0482	putative heavy metal transport/detoxification protein	24.2496	23.6496	23.8745	24.1038	22.9121	22.8116	22.5619	23.223	4	0.00129	23.9694	22.8772	-1.09224	0.469033	0.0012
gi|172035404	cce_0488	unknown	20.8539	20.8828	20.6532	20.2843	20.9431	20.7315	20.031	20.4627	2	0.207	20.6686	20.5421	-0.126474	0.916067	0.617
gi|172035409	cce_0493	6-pyruvoyl tetrahydropterin synthase	18.2639	18.8057	18.8154	19.4139	19.0391	19.1248	19.4564	20.2607	2	0.0574	18.8247	19.4702	0.645518	1.5643	0.127
gi|172035410	cce_0494	unknown	27.1172	27.0031	27.2036	26.7345	26.6382	25.7993	27.3349	25.6514	3	0.0682	27.0146	26.356	-0.658651	0.63347	0.155
gi|172035418	cce_0502	bifunctional orotidine-5'-phosphate decarboxylase/orotate phosphoribosyltransferase protein	20.1438	19.7394	19.566	19.7775	20.9588	20.8989	20.319	20.2672	2	0.00779	19.8067	20.611	0.804322	1.74632	0.0108
gi|172035421	cce_0505	peptidyl-prolyl cis-trans isomerase	23.8853	24.1451	23.8622	23.9008	24.2685	24.3519	24.3548	23.925	17	0.0321	23.9483	24.225	0.276684	1.21141	0.0631
gi|172035426	cce_0510	homoserine kinase	20.822	21.2828	20.9895	21.0806	20.5647	20.47	20.1566	20.291	5	0.00209	21.0437	20.3706	-0.673157	0.627133	0.00226
gi|172035428	cce_0512	unknown	22.0091	21.4142	21.6066	21.3253	21.6124	21.6048	21.3459	14.465	2	0.174	21.5888	19.757	-1.83178	0.280919	0.483
gi|172035429	cce_0513	unknown	21.6629	21.8623	21.6774	22.0652	21.5192	21.0031	21.3812	20.8989	4	0.00897	21.8169	21.2006	-0.616323	0.652331	0.0128
gi|172035430	cce_0514	hypothetical protein cce_0514	21.9427	21.2752	20.1552	21.6745	14.465	14.465	20.9562	20.5364	2	0.16	21.2619	17.6057	-3.65625	0.0793159	0.432
gi|172035431	cce_0515	probable glycosyl transferase, group 1	21.0425	21.4695	21.4521	21.0411	21.8446	21.8711	21.8729	21.9501	5	0.00201	21.2513	21.8847	0.633363	1.55118	0.00213
gi|172035441	cce_0525	unknown	18.5889	19.3178	20.7733	19.818	20.0123	20.7997	20.9346	21.7817	5	0.0369	19.6245	20.8821	1.25759	2.39096	0.0749
gi|172035461	cce_0545	putative Nitrogenase-associated protein	19.2866	19.2641	19.1551	18.6863	14.465	14.465	14.465	14.465	2	4.23e-06	19.098	14.465	-4.63304	0.040301	1.39e-07
gi|172035470	cce_0554	nitrogenase cofactor biosynthesis protein	22.7702	22.7566	22.5511	22.854	20.997	21.3383	21.765	21.1892	7	0.000374	22.733	21.3224	-1.4106	0.376155	0.000198
gi|172035473	cce_0557	nitrogenase cofactor synthesis protein	14.465	20.8986	14.465	14.465	14.465	21.6049	21.4032	21.3282	2	0.131	16.0734	19.7003	3.62692	12.3541	0.335
gi|172035474	cce_0558	iron-sulfur cluster assembly protein	23.7682	23.6622	23.3743	23.8574	14.465	14.465	14.465	14.465	2	0.00164	23.6655	14.465	-9.20055	0.00169965	0.00165
gi|172035475	cce_0559	nitrogenase iron protein	26.1846	26.0301	26.0642	26.2853	14.465	14.465	14.465	14.465	12	4.66e-07	26.1411	14.465	-11.6761	0.000305599	5.48e-09
gi|172035476	cce_0560	nitrogenase molybdenum-iron protein alpha chain	24.6211	24.8793	24.6219	24.5887	14.465	14.465	14.465	14.465	13	9.86e-06	24.6778	14.465	-10.2128	0.000842665	5.64e-07
gi|172035477	cce_0561	nitrogenase molybdenum-iron protein beta chain	23.7111	23.8059	23.928	23.5285	22.4395	22.204	22.2941	19.1191	14	0.0186	23.7434	21.5142	-2.22917	0.213282	0.0324
gi|172035482	cce_0566	DUF269-containing protein	23.912	23.8854	23.8788	23.3706	14.465	14.465	14.465	14.465	3	0.00204	23.7617	14.465	-9.29672	0.00159004	0.00219
gi|172035483	cce_0567	DUF683-containing protein	19.6035	19.9472	20.1803	14.465	14.465	14.465	14.465	14.465	2	0.018	18.549	14.465	-4.084	0.0589649	0.031
gi|172035484	cce_0568	nitrogen fixation protein	22.7793	23.0546	22.669	22.6858	14.465	14.465	14.465	14.465	4	0.014	22.7972	14.465	-8.33219	0.00310285	0.0221
gi|172035505	cce_0589	cytochrome c family protein	27.7774	27.6774	27.6844	27.8505	27.1363	27.3438	26.9574	26.8716	8	0.00116	27.7474	27.0773	-0.670117	0.628456	0.000997
gi|172035506	cce_0590	plastocyanin	23.426	23.3874	23.6984	23.176	26.6406	26.5235	26.5863	26.4706	4	4.23e-06	23.422	26.5553	3.1333	8.77441	1.49e-07
gi|172035511	cce_0595	glucokinase	21.3621	21.3545	21.775	22.2696	21.7598	21.7577	21.5947	21.9345	3	0.245	21.6903	21.7617	0.0713436	1.05069	0.764
gi|172035514	cce_0598	unknown	25.3441	25.287	25.1544	25.3384	25.7018	25.5348	25.5487	25.5961	17	0.00164	25.281	25.5953	0.314366	1.24347	0.00165
gi|172035522	cce_0606	phosphoglucomutase	25.1353	25.1946	25.0916	25.2512	24.944	24.8855	25.0289	25.0474	13	0.00721	25.1682	24.9764	-0.191765	0.875534	0.00969
gi|172035523	cce_0607	putative ribonuclease H	27.4634	27.6489	27.4809	27.4735	27.4148	27.3663	26.9939	27.1406	12	0.021	27.5167	27.2289	-0.287787	0.819158	0.0373
gi|172035525	cce_0609	unknown	21.1456	21.1816	21.5142	21.3909	21.1608	20.0122	21.1651	20.8559	3	0.0566	21.3081	20.7985	-0.509559	0.702437	0.125
gi|172035532	cce_0616	unknown	21.4291	21.7663	21.992	21.7499	22.7498	22.6278	22.6828	22.4563	2	0.000718	21.7343	22.6292	0.89483	1.85939	0.000497
gi|172035539	cce_0623	polyribonucleotide nucleotidyltransferase	26.6358	26.608	26.6947	26.6111	26.4061	26.2634	26.3395	26.6469	32	0.0219	26.6374	26.414	-0.223443	0.856519	0.0397
gi|172035545	cce_0629	putative CP12	26.582	26.3958	26.3702	26.5112	25.8482	25.3695	25.9924	26.4026	3	0.0232	26.4648	25.9032	-0.561613	0.677544	0.0426
gi|172035552	cce_0636	photosystem II D1 protein	25.9172	26.349	26.3047	25.6089	27.3489	27.2173	26.9675	27.2572	4	0.00115	26.045	27.1977	1.15278	2.22342	0.000983
gi|172035557	cce_0641	ATP-dependent Clp protease, proteolytic subunit	25.6731	25.8094	25.8623	26.0928	25.1245	24.9818	24.8265	24.9212	6	0.000335	25.8594	24.9635	-0.895896	0.537413	0.000161
gi|172035569	cce_0653	putative modulator of DNA gyrase	23.5564	23.3637	23.351	23.5879	22.699	23.1012	23.5323	22.7759	11	0.0354	23.4647	23.0271	-0.437659	0.738332	0.0708
gi|172035570	cce_0654	2Fe-2S ferredoxin	24.0047	24.0173	24.1282	24.756	22.4303	22.5727	22.3248	23.5308	2	0.00326	24.2266	22.7146	-1.51191	0.350647	0.00373
gi|172035575	cce_0659	photosystem II CP43 protein, chlorophyll-binding protein CP43	25.9749	25.8989	25.7623	25.6911	26.7932	26.8037	26.6966	26.7173	14	5.79e-05	25.8318	26.7527	0.920905	1.8933	1.16e-05
gi|172035576	cce_0660	photosystem II D2 protein	26.4361	26.5733	26.2301	26.5401	26.9023	26.7261	26.9884	26.8475	5	0.00371	26.4449	26.8661	0.421183	1.33903	0.00438
gi|172035577	cce_0661	putative GatB/Yqey	23.3191	23.3031	23.0519	23.3717	23.0749	23.5617	22.9028	23.4847	4	0.29	23.2614	23.256	-0.00543219	0.996242	0.976
gi|172035578	cce_0662	unknown	18.9175	18.2454	18.2453	18.6826	19.2157	19.0355	19.213	19.5827	2	0.00779	18.5227	19.2617	0.739001	1.66902	0.0108
gi|172035579	cce_0663	succinate dehydrogenase flavoprotein subunit	21.3225	21.7799	21.2338	21.8236	21.2487	21.2818	21.8254	21.0641	5	0.162	21.54	21.355	-0.184965	0.879671	0.44
gi|172035582	cce_0666	glucose-6-phosphate isomerase	25.4615	25.5119	25.6686	25.6599	24.8422	24.6126	24.8015	24.8702	25	0.000151	25.5755	24.7816	-0.793856	0.5768	5.3e-05
gi|172035594	cce_0678	two-component response regulator	24.902	24.8299	24.7166	24.8685	25.0303	24.9821	24.8565	25.1905	8	0.0305	24.8293	25.0149	0.185586	1.13728	0.0594
gi|172035602	cce_0686	iron-sulfur assembly ATPase	23.2991	23.4826	23.4992	23.1971	22.245	22.8774	21.4641	21.9858	8	0.00529	23.3695	22.1431	-1.22642	0.427376	0.00672
gi|172035604	cce_0688	nucleoside diphosphate kinase	26.2006	26.2142	26.2075	26.0061	26.6145	26.3864	26.3891	26.0895	12	0.0564	26.1571	26.3699	0.212765	1.15891	0.124
gi|172035620	cce_0704	elongation factor TS	26.5404	26.5338	26.4585	26.6824	26.1624	26.3899	26.204	26.3668	15	0.00743	26.5538	26.2808	-0.273008	0.827592	0.0101
gi|172035621	cce_0705	30S ribosomal protein S2	26.6202	26.6774	26.4775	26.6429	26.6436	26.3388	26.4694	26.9218	13	0.281	26.6045	26.5934	-0.0111139	0.992326	0.936
gi|172035624	cce_0708	leucine aminopeptidase	23.2096	23.0669	23.1892	23.2894	23.4435	23.8283	23.6159	23.8048	12	0.00273	23.1888	23.6731	0.484341	1.39895	0.00304
gi|172035626	cce_0710	unknown	24.757	24.8975	24.9595	24.9747	25.5162	25.4637	25.2064	25.8882	7	0.00474	24.8972	25.5186	0.621455	1.53843	0.00589
gi|172035651	cce_0735	dihydrolipoamide dehydrogenase	24.0034	23.9859	23.9378	23.6348	24.705	24.8108	24.9227	24.9127	16	0.000193	23.8905	24.8378	0.947311	1.92828	8.01e-05
gi|172035653	cce_0737	unknown	19.8494	14.465	14.465	20.4313	14.465	20.192	20.8839	21.6552	2	0.268	17.3027	19.299	1.99634	3.98986	0.872
gi|172035674	cce_0758	DNA gyrase B subunit	24.3458	24.2844	24.3559	24.4413	24.2442	24.2118	24.2748	24.4334	18	0.121	24.3568	24.291	-0.065791	0.955421	0.306
gi|172035680	cce_0764	unknown	23.8363	24.05	23.8575	23.7623	24.408	24.2644	24.432	24.268	13	0.00107	23.8765	24.3431	0.466534	1.38179	0.000848
gi|172035686	cce_0770	phosphoglucomutase/phosphomannomutase	24.3155	24.2499	24.2486	24.4076	24.8211	24.8414	25.3331	25.2425	11	0.00158	24.3054	25.0595	0.754134	1.68662	0.00159
gi|172035692	cce_0776	photosystem II protein Q	25.8852	25.8328	25.8767	25.9072	26.4196	26.4117	26.0644	26.0153	12	0.0122	25.8755	26.2277	0.352247	1.27655	0.0186
gi|172035694	cce_0778	unknown	21.5572	20.8435	20.5083	20.6842	21.5572	21.0059	20.7819	14.465	2	0.104	20.8983	19.4525	-1.44577	0.367096	0.257
gi|172035695	cce_0779	extracellular solute-binding protein, family 5	20.5491	20.1516	20.2112	20.5079	21.5676	21.2207	21.8529	21.7428	3	0.000551	20.355	21.596	1.24106	2.36372	0.000352
gi|172035698	cce_0782	aldo/keto reductase	14.465	19.0073	19.1182	18.813	19.7291	14.465	19.4969	19.6635	2	0.239	17.8509	18.3386	0.487762	1.40227	0.738
gi|172035700	cce_0784	gid protein	21.0957	20.4502	20.5193	21.1023	20.8594	20.7865	20.8602	20.5333	8	0.268	20.7919	20.7598	-0.03203	0.978043	0.874
gi|172035714	cce_0798	ribulose-phosphate 3-epimerase	25.3087	25.2306	25.4267	25.3517	26.4949	26.3676	26.4217	26.3797	15	9.86e-06	25.3295	26.416	1.08654	2.12364	6.25e-07
gi|172035717	cce_0801	50s ribosomal protein L19	25.6203	25.7669	25.716	25.8273	25.7876	25.6168	25.5981	25.3695	13	0.0838	25.7326	25.593	-0.139647	0.907741	0.198
gi|172035720	cce_0804	photosystem II oxygen evolving complex protein PsbP, 23 kD extrinsic protein	23.4276	23.0322	23.3162	23.312	23.8034	23.5485	23.7864	23.7747	6	0.00382	23.272	23.7282	0.456222	1.37194	0.00455
gi|172035722	cce_0806	unknown	23.6616	23.8097	23.7179	23.5438	23.5954	23.4096	23.7969	22.7749	5	0.103	23.6833	23.3942	-0.289109	0.818408	0.252
gi|172035727	cce_0811	methenyltetrahydrofolate cyclohydrolase	23.0056	23.214	23.0582	22.822	23.0527	22.5005	22.5518	22.0687	5	0.0343	23.0249	22.5434	-0.481535	0.716215	0.0683
gi|172035731	cce_0815	unknown	21.0137	21.3339	21.2605	21.5475	22.2541	22.0732	21.9601	22.1648	4	0.000854	21.2889	22.113	0.824132	1.77047	0.000632
gi|172035734	cce_0818	UDP-N-acetylmuramoylalanyl-D-glutamate--2,6-diaminopimelate ligase	20.5323	19.7276	20.0101	20.2012	19.5672	19.1038	14.465	18.4537	4	0.286	20.1178	17.8974	-2.22037	0.214586	0.954
gi|172035738	cce_0822	unknown	22.622	22.7811	22.3336	22.4824	21.471	20.9057	21.4473	21.5552	6	0.000698	22.5548	21.3448	-1.20998	0.432275	0.000473
gi|172035739	cce_0823	unknown	21.4285	21.4464	21.538	21.2011	21.5735	21.6068	21.4561	22.3773	2	0.0721	21.4035	21.7534	0.349887	1.27446	0.167
gi|172035745	cce_0829	anthranilate phosphoribosyltransferase	21.5292	22.0073	21.9962	21.7752	22.6655	22.6484	22.5606	21.9041	5	0.0163	21.8269	22.4446	0.617686	1.53441	0.0277
gi|172035747	cce_0831	naphthoate synthase	20.6295	21.3198	21.2598	20.8442	14.465	14.465	19.6045	14.465	2	0.0931	21.0133	15.7499	-5.26343	0.0260345	0.225
gi|172035751	cce_0835	S-adenosyl-L-homocysteine hydrolase	27.4057	27.3962	27.3653	27.4168	27.4936	27.324	27.4707	27.3446	23	0.25	27.396	27.4082	0.0122492	1.00853	0.793
gi|172035759	cce_0843	putative nicotinamide nucleotide transhydrogenase, subunit alpha 1 (A1)	23.1529	23.0883	22.9657	23.1367	21.4016	21.6745	21.1467	21.3892	8	4.02e-05	23.0859	21.403	-1.6829	0.311456	6.68e-06
gi|172035760	cce_0844	molybdenum-pterin binding protein	26.7821	26.914	27.0079	26.8032	25.3563	24.9579	24.986	25.2539	4	3.07e-05	26.8768	25.1385	-1.73826	0.29973	4.44e-06
gi|172035763	cce_0847	molybdenum ABC transporter, periplasmic binding protein	19.9936	20.6476	20.2938	20.4999	20.7545	20.5329	21.0006	18.7069	4	0.261	20.3587	20.2487	-0.109974	0.926605	0.846
gi|172035771	cce_0855	DUF541-containing protein	22.6741	22.196	22.3107	22.4534	20.0779	20.4878	21.0246	20.7173	2	0.000363	22.4086	20.5769	-1.83164	0.280945	0.000182
gi|172035776	cce_0860	photosystem II 10 kD phosphoprotein	25.1273	25.1607	25.2469	24.8887	25.9106	25.3965	23.2167	25.1971	2	0.247	25.1059	24.9302	-0.175671	0.885356	0.778
gi|172035788	cce_0872	putative UCP014873	21.2735	23.4367	23.4608	23.3922	22.9914	22.7602	22.9773	22.9086	2	0.29	22.8908	22.9094	0.0185568	1.01295	0.974
gi|172035791	cce_0875	group 1 sigma-70 RNA polymerase sigma factor A	22.6725	22.4545	22.3926	22.463	22.2135	22.1323	22.1998	22.4725	10	0.0251	22.4957	22.2545	-0.241144	0.846074	0.0466
gi|172035793	cce_0877	geranylgeranyl pyrophosphate synthase	21.1304	21.127	21.0906	21.0549	22.8707	22.9289	22.8658	23.2754	6	1.37e-05	21.1007	22.9852	1.88448	3.69219	1.39e-06
gi|172035798	cce_0882	phosphate ABC transporter, ATP-binding protein	14.465	14.465	14.465	14.465	21.2203	21.3265	21.3687	19.7736	2	0.00122	14.465	20.9223	6.45729	87.8696	0.00112
gi|172035802	cce_0886	phosphate ABC transporter, periplasmic phosphate-binding protein	25.5499	25.6032	25.7555	25.8196	26.3259	26.3243	26.3478	26.0423	12	0.00115	25.682	26.2601	0.578041	1.49282	0.000969
gi|172035806	cce_0890	glycogen synthase	21.5843	21.4583	21.5823	20.9317	21.5035	21.6394	21.8579	20.9678	4	0.227	21.3892	21.4921	0.102969	1.07398	0.689
gi|172035807	cce_0891	unknown	20.5938	20.738	20.9009	20.1686	21.2471	20.5595	20.8829	20.1843	6	0.226	20.6003	20.7184	0.118115	1.08532	0.683
gi|172035813	cce_0897	gamma-glutamyl phosphate reductase	20.7323	20.1943	20.5047	20.5695	19.6374	18.999	20.3391	18.6534	3	0.0178	20.5002	19.4072	-1.09298	0.468791	0.0305
gi|172035818	cce_0902	carbamoyl phosphate synthase small subunit	23.3286	23.5752	23.6497	23.4469	22.5532	22.6573	22.5632	21.9176	11	0.00122	23.5001	22.4228	-1.07724	0.473934	0.0011
gi|172035820	cce_0904	unknown	22.2696	20.9137	21.2629	22.018	21.8751	21.6148	21.4766	20.4575	3	0.197	21.616	21.356	-0.260036	0.835067	0.579
gi|172035827	cce_0911	unknown	23.3545	23.3072	23.4396	23.0012	23.6434	23.0207	23.0828	23.8987	3	0.198	23.2757	23.4114	0.135717	1.09864	0.584
gi|172035831	cce_0915	unknown	24.003	24.3587	24.3194	24.4531	23.812	23.86	24.156	23.698	4	0.016	24.2836	23.8815	-0.402036	0.75679	0.0269
gi|172035836	cce_0920	phycobilisome core-membrane linker polypeptide	26.8968	26.8482	26.8494	26.8805	28.065	28.0762	28.1926	28.1472	77	8.73e-07	26.8687	28.1202	1.25151	2.3809	2.05e-08
gi|172035839	cce_0923	MRP protein-like protein	23.8175	23.9102	24.0653	24.3084	22.9884	24.1527	24.1223	24.4923	5	0.254	24.0253	23.9389	-0.08641	0.941864	0.811
gi|172035840	cce_0924	unknown	24.7946	24.8689	25.1361	24.8571	24.6338	24.5872	24.6836	24.1667	6	0.0178	24.9142	24.5178	-0.39635	0.759778	0.0306
gi|172035860	cce_0944	putative peptidase S13, D-Ala-D-Ala carboxypeptidase C	24.3258	18.2513	21.3558	18.5622	19.5123	19.7339	19.5902	18.8628	3	0.16	20.6238	19.4248	-1.19901	0.435574	0.434
gi|172035861	cce_0945	unknown	19.1895	18.8471	18.3817	18.4956	19.9358	19.6459	19.4683	19.581	3	0.00365	18.7285	19.6578	0.92926	1.9043	0.00427
gi|172035869	cce_0953	pyruvate oxidoreductase	23.0563	23.2026	23.0493	23.1069	22.7041	22.6246	22.5243	22.3063	9	0.00112	23.1038	22.5398	-0.563966	0.67644	0.000915
gi|172035879	cce_0963	4-diphosphocytidyl-2-C-methyl-D-erythritol synthase	20.2882	20.3708	19.8399	20.2253	20.4999	21.0023	20.303	20.2741	2	0.0664	20.181	20.5198	0.338785	1.26469	0.15
gi|172035882	cce_0966	putative GHMP kinase, LmbP protein	22.0624	20.2892	21.7413	22.3772	21.1459	14.465	14.465	21.7903	3	0.139	21.6175	17.9666	-3.65095	0.0796075	0.36
gi|172035889	cce_0973	glycerol kinase	18.8737	19.201	14.465	14.465	21.1085	20.8831	20.7905	20.1756	5	0.246	16.7512	20.7394	3.98823	15.87	0.768
gi|172035891	cce_0975	unknown	24.5166	24.4066	24.4364	21.703	24.784	24.9728	25.0643	22.6058	4	0.187	23.7657	24.3567	0.591045	1.50634	0.537
gi|172035902	cce_0986	unknown	21.9692	22.7313	22.4138	22.0021	22.5188	22.5752	22.011	21.2252	2	0.205	22.2791	22.0826	-0.196564	0.872626	0.606
gi|172035903	cce_0987	glucose-1-phosphate adenylyltransferase glgC1	24.2964	24.4819	24.5359	24.2762	25.2683	25.0038	25.4145	25	23	0.000911	24.3976	25.1716	0.774009	1.71001	0.000703
gi|172035904	cce_0988	probable Haloacid dehalogenase-like hydrolase, type 3	20.2825	19.8528	19.6627	19.3192	20.7627	20.9924	20.7996	19.4351	2	0.0588	19.7793	20.4975	0.71813	1.64505	0.131
gi|172035905	cce_0989	photosystem I P700 chlorophyll a apoprotein subunit Ia	28.0501	27.9363	28.0546	27.981	28.3576	28.1985	28.036	28.4224	7	0.0195	28.0055	28.2536	0.248102	1.18764	0.0344
gi|172035906	cce_0990	photosystem I P700 chlorophyll a apoprotein subunit Ib	29.248	29.392	28.9803	29.5976	28.4012	28.2402	28.6169	28.5836	5	0.00164	29.3045	28.4605	-0.843993	0.5571	0.00167
gi|172035910	cce_0994	ferredoxin-NADP oxidoreductase	28.0657	28.1423	28.0363	27.971	27.7231	27.6305	27.6139	27.5375	26	0.000361	28.0538	27.6262	-0.427588	0.743504	0.000177
gi|172035911	cce_0995	phosphoribulokinase	25.7062	25.7929	25.8963	25.5429	26.5029	26.6035	26.3977	26.6429	15	0.000286	25.7346	26.5367	0.802164	1.74371	0.000132
gi|172035913	cce_0997	glutamate dehydrogenase	20.2108	14.465	14.465	20.9012	21.3171	21.7431	21.624	21.731	2	0.244	17.5105	21.6038	4.09329	17.0688	0.757
gi|172035920	cce_1004	cysteine desulphurase	18.8881	19.5227	20.1225	21.3609	20.3785	20.4006	19.8334	19.5818	2	0.272	19.9735	20.0486	0.0750466	1.0534	0.899
gi|172035921	cce_1005	putative iron-sulfur assembly protein	24.418	24.3152	24.4076	24.2501	22.4823	22.4021	22.7426	22.4846	7	9.86e-06	24.3477	22.5279	-1.81982	0.283256	6.38e-07
gi|172035928	cce_1012	unknown	21.7603	21.6059	21.8359	22.1015	19.4188	19.9711	20.1797	20.3081	2	0.000332	21.8259	19.9694	-1.85646	0.276152	0.000159
gi|172035929	cce_1013	RNA-binding protein	26.1392	25.9957	26.0746	26.1136	26.3057	26.6817	26.8298	27.1377	5	0.00715	26.0808	26.7387	0.657951	1.57784	0.00954
gi|172035932	cce_1016	ribonuclease D	22.3397	21.9128	22.5595	22.1794	21.2001	21.454	21.3656	21.7814	4	0.00395	22.2478	21.4503	-0.797587	0.57531	0.00478
gi|172035934	cce_1018	putative 2-phosphosulfolactate phosphatase	22.905	22.9151	23.1663	23.114	23.4511	23.5543	23.3883	23.1139	5	0.0142	23.0251	23.3769	0.35177	1.27612	0.0228
gi|172035946	cce_1030	thioredoxin	23.5697	23.8683	23.7591	23.7538	21.9175	21.9374	22.1399	22.8799	4	0.000862	23.7377	22.2187	-1.51904	0.348918	0.000641
gi|172035947	cce_1031	putative PspA/IM30	25.91	26.0841	25.8999	26.1572	25.0051	25.0658	25.2111	25.5476	17	0.00121	26.0128	25.2074	-0.805407	0.572201	0.00108
gi|172035948	cce_1032	tyrosyl tRNA synthetase	20.2964	20.6099	20.4386	20.8282	21.0281	21.2919	20.8497	20.5697	4	0.0411	20.5433	20.9348	0.391565	1.31182	0.0852
gi|172035950	cce_1034	unknown	25.5915	25.5553	25.4764	25.8298	24.9687	24.9672	25.0949	25.3186	10	0.00302	25.6132	25.0874	-0.52587	0.69454	0.0034
gi|172035952	cce_1036	unknown	20.5451	20.6717	20.6275	21.1436	20.8405	20.4983	20.3435	20.372	3	0.0965	20.747	20.5136	-0.233395	0.850631	0.234
gi|172035965	cce_1049	NDH-1S subunit, CO2 uptake Small protein	23.5402	23.5657	24.0418	23.7191	23.6658	23.7563	23.5604	23.8696	3	0.29	23.7167	23.713	-0.00366571	0.997462	0.979
gi|172035969	cce_1053	conserved hypothetical protein	23.7799	23.9727	23.8644	23.8312	24.7833	24.8356	24.9144	24.0662	6	0.00593	23.862	24.6499	0.78783	1.72648	0.00774
gi|172035973	cce_1057	putative L-asparaginase II	19.7008	19.7892	19.5217	19.5532	20.3736	19.7395	20.5063	19.5189	3	0.0715	19.6413	20.0346	0.393335	1.31343	0.164
gi|172035975	cce_1059	putative Iojap-related protein	21.1583	22.0501	21.883	21.9712	20.7153	21.337	21.7265	22.4723	2	0.215	21.7656	21.5628	-0.202841	0.868838	0.647
gi|172035978	cce_1062	putative YrdC-like RNA-binding protein	14.465	14.465	14.465	14.465	21.8813	21.7816	21.919	22.4351	3	0.000401	14.465	22.0043	7.53926	186.013	0.000224
gi|172035983	cce_1067	unknown	21.1101	21.2038	21.4345	21.2849	21.4386	21.916	21.8168	21.2189	3	0.048	21.2583	21.5976	0.339266	1.26511	0.103
gi|172035989	cce_1074	magnesium chelatase, ATPase subunit D	18.5888	19.0514	19.3382	19.6009	18.2132	18.5859	17.3696	18.2995	4	0.0143	19.1448	18.1171	-1.02777	0.490468	0.0232
gi|172035996	cce_1081	unknown	24.1158	23.986	23.9994	24.0139	23.4092	23.3464	23.542	23.8404	9	0.00397	24.0288	23.5345	-0.494277	0.709918	0.00484
gi|172035999	cce_1084	phosphoribosylglycinamide synthetase	20.0245	19.9932	19.9291	20.1623	14.465	18.9422	14.465	18.7076	2	0.173	20.0273	16.6449	-3.38233	0.0958994	0.477
gi|172036020	cce_1105	prolyl endopeptidase	18.1698	18.7596	18.6597	18.2553	17.8688	18.0147	18.3804	18.1733	3	0.0477	18.4611	18.1093	-0.351796	0.783608	0.102
gi|172036023	cce_1108	putative LytB protein	21.5199	21.0185	21.621	21.4378	21.1734	22.6478	22.6306	22.4001	4	0.0362	21.3993	22.213	0.813694	1.75771	0.0732
gi|172036027	cce_1112	unknown	18.8885	19.6295	18.9325	18.8227	18.925	19.1297	19.4105	19.1284	4	0.235	19.0683	19.1484	0.0800955	1.05709	0.72
gi|172036040	cce_1125	dihydroorotate dehydrogenase	22.3113	22.6998	22.5124	22.809	21.2816	21.3779	20.9157	21.6232	2	0.000638	22.5832	21.2996	-1.28355	0.410783	0.000419
gi|172036048	cce_1133	probable long-chain-fatty-acid CoA ligase	24.4868	24.5058	24.4296	24.3654	23.8049	23.8251	23.8155	24.199	24	0.00178	24.4469	23.9111	-0.535755	0.689798	0.00183
gi|172036049	cce_1134	unknown	24.9283	25.0669	24.9138	25.1116	25.4828	25.7435	25.5179	25.8208	10	0.000812	25.0051	25.6413	0.636105	1.55413	0.000595
gi|172036051	cce_1136	GTP-dependent translation factor	23.8729	23.8852	23.7042	23.5887	23.6881	23.4852	23.3519	23.5641	12	0.0281	23.7628	23.5223	-0.240448	0.846483	0.0533
gi|172036058	cce_1143	peptide chain release factor RF-3	19.0286	20.0023	20.3682	19.5492	20.023	20.5592	19.3527	19.4973	2	0.246	19.7371	19.8581	0.120974	1.08747	0.772
gi|172036070	cce_1155	Peptidase M48, Ste24p	21.2173	21.1695	20.8129	20.4475	21.8933	22.0039	21.4437	21.1377	2	0.0217	20.9118	21.6197	0.707844	1.63336	0.0392
gi|172036073	cce_1158	unknown	14.465	18.8463	19.339	19.5889	14.465	20.836	20.7809	19.8007	3	0.174	18.0598	18.9707	0.910871	1.88018	0.483
gi|172036084	cce_1169	unknown	20.6019	20.9958	20.4981	20.2557	22.09	22.3665	22.1493	22.0288	4	0.000216	20.5879	22.1587	1.5708	2.97069	9.3e-05
gi|172036102	cce_1187	cobalamin biosynthesis protein/P47K	22.1084	21.7457	22.5632	22.5156	22.4782	22.5889	22.4787	22.1437	2	0.155	22.2332	22.4224	0.189143	1.14009	0.412
gi|172036122	cce_1207	sucrose phosphate synthase	19.2684	19.2826	19.0882	18.9902	19.9671	20.4666	20.5807	21.0884	2	0.00134	19.1573	20.5257	1.36835	2.58175	0.00128
gi|172036125	cce_1210	phosphoribosylformylglycinamidine synthase II	22.6622	22.9375	23.2441	22.7077	22.3639	22.4912	22.6117	22.9735	5	0.0804	22.8879	22.6101	-0.277799	0.824848	0.188
gi|172036126	cce_1211	amidophosphoribosyl transferase	22.4513	22.8482	23.0615	22.9192	22.9965	23.3074	23.0543	23.3027	3	0.0335	22.82	23.1652	0.345172	1.2703	0.0663
gi|172036138	cce_1223	ferredoxin-nitrite reductase	21.1232	20.6273	20.8503	20.7134	18.9359	20.6862	14.465	14.465	2	0.195	20.8285	17.138	-3.69054	0.077453	0.572
gi|172036145	cce_1230	putative anion-transporting ATPase	22.6042	22.8017	22.6676	22.6034	22.8248	22.97	22.7199	22.8761	14	0.0235	22.6692	22.8477	0.178507	1.13171	0.0434
gi|172036146	cce_1231	unknown	26.024	26.0364	26.1901	26.2228	25.5521	25.5774	25.8694	26.2219	8	0.049	26.1183	25.8052	-0.313172	0.80487	0.106
gi|172036149	cce_1234	NAD-dependent epimerase/dehydratase	23.5978	23.6729	23.8845	23.3819	24.3613	24.1465	24.2427	24.5092	8	0.00186	23.6343	24.3149	0.680653	1.60286	0.00194
gi|172036150	cce_1235	DNA topoisomerase I	23.3532	23.5403	23.5445	23.4642	23.6193	23.8954	24.1551	24.1394	22	0.00839	23.4755	23.9523	0.476747	1.3916	0.0118
gi|172036167	cce_1252	unknown	19.3383	14.465	19.1083	19.5434	14.465	19.5181	19.0846	18.7328	3	0.275	18.1138	17.9501	-0.163652	0.892762	0.909
gi|172036181	cce_1266	glucosamine-fructose-6-phosphate aminotransferase, isomerising	23.2896	23.4643	23.435	23.2631	22.5053	23.0876	23.2457	23.0138	10	0.0285	23.363	22.9631	-0.399887	0.757918	0.0547
gi|172036185	cce_1270	cell division protein	25.705	25.6314	25.5795	25.7841	26.06	25.8236	25.8124	25.3433	25	0.205	25.675	25.7598	0.0848172	1.06055	0.608
gi|172036187	cce_1272	rfrA family pentapeptide repeat	21.0358	20.7333	20.9341	20.8629	21.7378	21.8471	21.7763	21.7499	4	5.89e-05	20.8915	21.7778	0.886252	1.84837	1.27e-05
gi|172036192	cce_1277	putative histone-like DNA-binding protein	24.5382	24.5068	24.6044	24.5426	25.1564	24.9791	24.5688	24.9743	7	0.0155	24.548	24.9197	0.371659	1.29384	0.0257
gi|172036198	cce_1283	unknown	24.1242	24.3024	24.2286	24.2808	24.523	24.5911	24.6758	24.8639	11	0.00203	24.234	24.6634	0.429435	1.34671	0.00217
gi|172036199	cce_1284	UDP-N-acetylglucosamine--N-acetylmuramyl-(pentapeptide) pyrophosphoryl -undecaprenol N-acetylglucosamine transferase	19.7394	20.1471	19.7348	20.1674	19.7218	19.6441	19.6312	19.4143	3	0.0252	19.9472	19.6029	-0.344309	0.787685	0.047
gi|172036202	cce_1287	unknown	21.1459	20.8919	20.9759	21.267	21.192	21.312	21.5548	20.9191	2	0.122	21.0702	21.2445	0.174273	1.1284	0.309
gi|172036203	cce_1288	putative lipoxygenase	14.465	14.465	14.465	14.465	20.6275	19.0411	19.9578	14.465	2	0.0153	14.465	18.5228	4.05783	16.6543	0.0254
gi|172036205	cce_1290	photosystem I reaction center subunit III	28.2155	28.112	28.1403	28.177	28.3658	28.5274	28.5001	28.7967	7	0.0048	28.1612	28.5475	0.386313	1.30705	0.00599
gi|172036214	cce_1299	heat shock protein Hsp40	21.9867	22.4103	21.8815	21.962	20.8517	20.2649	21.5289	20.8285	5	0.00466	22.0601	20.8685	-1.19161	0.437815	0.00577
gi|172036222	cce_1307	photosystem II cytochrome b559 alpha subunit	27.1705	27.0931	27.1284	26.9897	27.2425	27.1522	27.2789	26.8114	3	0.257	27.0954	27.1212	0.0258144	1.01805	0.828
gi|172036223	cce_1308	probable photosystem II stability/assembly factor	21.3301	21.533	21.5856	21.8624	22.2875	22.9414	23.0169	22.1183	3	0.00545	21.5778	22.591	1.01323	2.01843	0.007
gi|172036225	cce_1310	glycerol dehydrogenase	21.8126	21.7688	21.3038	21.9206	19.0315	18.7983	18.5529	19.0352	2	2.71e-05	21.7014	18.8545	-2.84694	0.13899	3.82e-06
gi|172036229	cce_1314	cell division protein	22.3747	22.2482	22.3384	22.6014	22.065	22.015	23.0911	23.4075	2	0.182	22.3907	22.6447	0.253981	1.19249	0.51
gi|172036232	cce_1317	4-diphosphocytidyl-2-C-methyl-D-erythritol kinase	18.9862	18.9858	19.1725	19.5407	18.8582	19.1551	19.2269	19.3479	2	0.271	19.1713	19.147	-0.0242997	0.983298	0.889
gi|172036233	cce_1318	phenylalanyl-tRNA synthetase alpha chain	22.6545	22.6346	22.6436	22.8226	21.8367	22.1613	21.9217	22.4633	10	0.00543	22.6888	22.0957	-0.593106	0.662914	0.00694
gi|172036236	cce_1321	phenylalanyl-tRNA synthetase beta subunit	22.8686	22.9792	22.9028	23.1528	23.1467	23.0619	23.0744	23.2068	19	0.0418	22.9758	23.1225	0.146617	1.10697	0.0872
gi|172036243	cce_1328	GTP-binding protein	20.2335	20.0534	18.9161	19.4417	19.2032	18.9204	19.4776	19.9271	2	0.173	19.6612	19.3821	-0.279085	0.824114	0.478
gi|172036245	cce_1330	DUF561-containing protein	22.9809	23.0133	23.0002	22.7995	24.3886	24.3565	24.3567	24.4002	5	4.23e-06	22.9485	24.3755	1.42702	2.68892	1.43e-07
gi|172036249	cce_1334	unknown	22.2099	22.3947	22.0301	22.4662	21.2104	21.1771	21.2658	21.3982	2	0.000214	22.2752	21.2629	-1.01235	0.495739	8.98e-05
gi|172036253	cce_1338	putative 23S rRNA methyltransferase/RumA	19.0076	17.5468	18.3896	18.6463	14.465	14.465	14.465	14.465	2	3.49e-05	18.3976	14.465	-3.93259	0.0654898	5.47e-06
gi|172036256	cce_1341	photosystem I reaction center subunit II	29.5824	29.4967	29.4941	29.7486	30.2901	30.1083	30.2145	30.3681	14	0.000363	29.5805	30.2453	0.664775	1.58532	0.000182
gi|172036258	cce_1343	chaperonin	28.0689	28.1472	28.3376	28.2203	27.47	27.1166	27.3144	26.973	14	0.000401	28.1935	27.2185	-0.975023	0.508732	0.000216
gi|172036259	cce_1344	chaperonin 1	29.0611	28.9703	28.8717	29.0828	27.9719	28.0136	28.0511	28.368	92	0.000274	28.9965	28.1012	-0.895331	0.537624	0.000124
gi|172036266	cce_1351	diaminopimelate decarboxylase	21.6965	14.465	21.316	21.3847	22.6374	21.9753	22.0531	22.3338	5	0.163	19.7156	22.2499	2.53434	5.79311	0.445
gi|172036267	cce_1352	unknown	22.7912	22.7574	22.6991	22.819	23.3415	23.1201	23.1153	23.4178	2	0.00119	22.7667	23.2487	0.481984	1.39666	0.00103
gi|172036271	cce_1356	heat shock protein Hsp70	22.0258	21.939	21.9405	21.8014	21.5529	21.8981	21.4489	21.7151	10	0.0247	21.9267	21.6537	-0.272947	0.827627	0.0457
gi|172036272	cce_1357	fructose-1,6-bisphosphate aldolase	28.1098	27.9088	28.1195	28.0469	27.6308	27.6354	27.7177	27.9028	24	0.00527	28.0463	27.7217	-0.324582	0.79853	0.00667
gi|172036279	cce_1364	putative 60 kD inner membrane insertion protein	21.4792	21.4399	21.0738	21.5519	21.8563	20.928	19.5588	20.5969	5	0.0945	21.3862	20.735	-0.651219	0.636742	0.229
gi|172036287	cce_1372	carboxyl-terminal protease	25.6609	25.6626	25.4323	25.6075	25.1693	25.0636	25.1355	24.7414	22	0.00219	25.5908	25.0274	-0.563369	0.67672	0.00238
gi|172036295	cce_1380	DUF1001-containing protein	19.8046	19.9601	20.2704	19.7597	21.4559	20.7755	21.0512	21.0465	2	0.000997	19.9487	21.0823	1.13358	2.19402	0.000785
gi|172036298	cce_1383	cytochrome b6	23.3698	23.2305	23.1765	23.1618	24.211	24.099	24.0223	24.0926	3	4.15e-05	23.2346	24.1062	0.871562	1.82964	7.64e-06
gi|172036299	cce_1384	cytochrome b6-f complex subunit 4	25.5104	25.526	25.5734	25.4451	24.7379	23.9374	24.6699	25.3441	3	0.016	25.5137	24.6723	-0.841368	0.558114	0.027
gi|172036306	cce_1391	50s ribosomal protein L21	26.3307	26.598	26.3595	26.2641	26.1878	26.098	26.2233	26.7137	4	0.207	26.3881	26.3057	-0.0823686	0.944506	0.618
gi|172036307	cce_1392	50S ribosomal protein L27	22.22	22.3202	22.2016	22.5581	21.9999	23.0681	23.3006	23.9388	4	0.0538	22.325	23.0768	0.75184	1.68394	0.118
gi|172036316	cce_1401	1-deoxy-D-xylulose-5-phosphate synthase	22.8443	23.2092	23.1832	23.1209	24.0123	23.8703	23.9619	23.6925	13	0.000549	23.0894	23.8842	0.794798	1.73483	0.000346
gi|172036321	cce_1406	DegT/DnrJ/EryC1/StrS aminotransferase family protein	19.8293	19.8555	19.6378	19.978	19.7792	19.7959	19.3113	19.2524	2	0.0565	19.8251	19.5347	-0.290438	0.817654	0.124
gi|172036328	cce_1413	probable sensory transduction histidine kinase	20.0906	20.4832	20.5785	20.6479	18.9414	18.8963	19.0634	19.0591	5	0.000102	20.45	18.9901	-1.45995	0.363505	3.17e-05
gi|172036329	cce_1414	unknown	22.6352	23.0663	23.2156	23.5947	23.6076	23.7459	23.8169	23.8232	5	0.0142	23.1279	23.7484	0.620459	1.53736	0.023
gi|172036333	cce_1418	probable AMP-dependent synthetase and ligase	22.9067	22.8422	22.7693	21.3804	22.409	22.188	21.4593	22.0463	2	0.127	22.4747	22.0257	-0.448988	0.732557	0.324
gi|172036338	cce_1423	transcriptional regulator	22.1431	21.8089	21.9537	21.7851	21.031	20.9956	20.3868	20.9313	2	0.000953	21.9227	20.8362	-1.08652	0.470896	0.000739
gi|172036345	cce_1430	unknown	19.4097	19.9798	14.465	14.465	20.6359	20.1132	20.792	20.8548	2	0.163	17.0799	20.599	3.51909	11.4644	0.443
gi|172036369	cce_1454	unknown	23.7185	23.9534	23.8605	23.5849	23.6726	23.5985	23.6739	23.713	8	0.0922	23.7793	23.6645	-0.114834	0.923489	0.222
gi|172036370	cce_1455	threonine synthase	21.2184	21.1938	21.0532	21.2102	21.7144	21.8297	21.6512	21.5667	2	0.000426	21.1689	21.6905	0.521613	1.43556	0.00025
gi|172036376	cce_1461	unknown	24.3936	24.2989	24.3756	23.6832	23.4527	23.5571	23.3813	23.1184	7	0.00466	24.1878	23.3774	-0.810439	0.570208	0.00577
gi|172036377	cce_1462	unknown	22.2144	22.1519	21.8386	21.9146	20.6295	20.7894	19.9713	20.9111	6	0.000911	22.0299	20.5753	-1.45452	0.364876	0.000702
gi|172036378	cce_1463	unknown	25.4664	25.3571	25.3558	25.3722	23.7899	23.9013	23.8335	23.2578	5	9.9e-05	25.3879	23.6956	-1.69225	0.309445	2.91e-05
gi|172036381	cce_1466	probable AMP-dependent synthetase and ligase	21.5923	20.9579	21.3965	21.2515	22.063	21.8054	21.8849	22.1279	5	0.0039	21.2995	21.9703	0.670735	1.59188	0.00469
gi|172036383	cce_1468	putative lipopolysaccharide biosynthesis	21.537	21.1953	20.9247	20.5983	21.3747	21.0327	21.019	20.9471	3	0.272	21.0638	21.0934	0.0295763	1.02071	0.898
gi|172036388	cce_1473	cysteine synthase A	25.4946	25.4532	25.4413	25.309	24.3935	24.328	24.549	24.411	16	2.5e-05	25.4245	24.4204	-1.00416	0.498559	3.33e-06
gi|172036389	cce_1474	4-alpha-glucanotransferase	24.0664	24.0648	24.088	23.8674	24.1613	23.8662	23.9865	23.6748	10	0.156	24.0216	23.9222	-0.0994346	0.933399	0.419
gi|172036392	cce_1477	unknown	24.7566	24.6572	24.5085	24.584	25.4858	25.5745	25.2728	25.4221	13	0.000166	24.6266	25.4388	0.812234	1.75593	6.41e-05
gi|172036393	cce_1478	unknown	22.2039	22.0712	20.4869	20.1445	22.2341	20.5094	22.3681	20.4337	5	0.26	21.2266	21.3863	0.159704	1.11706	0.838
gi|172036428	cce_1513	unknown	20.9467	20.8727	14.465	14.465	19.5183	21.2012	21.1312	21.4547	2	0.0746	17.6873	20.8264	3.13902	8.80925	0.174
gi|172036442	cce_1527	orotidine 5'-phosphate decarboxylase	19.9563	19.6155	19.606	20.0479	19.3476	19.3226	19.3088	19.9025	2	0.0538	19.8064	19.4704	-0.336078	0.792192	0.118
gi|172036471	cce_1556	putative sensor protein	21.6044	21.8548	21.5125	21.642	20.6314	21.4801	21.2181	20.8295	4	0.0146	21.6534	21.0398	-0.613666	0.653534	0.0238
gi|172036472	cce_1557	rfrA family pentapeptide repeat	21.5659	21.6506	21.9024	21.6445	19.9376	19.9762	19.6642	20.3225	2	0.000102	21.6909	19.9751	-1.71574	0.304446	3.06e-05
gi|172036478	cce_1563	unknown	22.2617	22.4794	22.6554	22.3956	23.3937	23.469	23.5337	23.0169	7	0.000911	22.448	23.3533	0.905297	1.87293	0.000702
gi|172036493	cce_1578	type IV pilus assembly protein	18.784	14.465	18.5226	18.7822	20.4018	20.0937	20.4517	20.5476	3	0.21	17.6384	20.3737	2.73527	6.65882	0.628
gi|172036494	cce_1579	unknown	21.1481	22.3117	22.7768	22.6618	22.6214	22.1711	22.5328	23.0315	2	0.154	22.2246	22.5892	0.36459	1.28752	0.41
gi|172036495	cce_1580	unknown	19.6252	19.1127	19.3704	17.7296	21.3798	21.7825	21.5379	21.503	2	0.00115	18.9595	21.5508	2.59131	6.02647	0.000959
gi|172036496	cce_1581	general secretion pathway protein D	21.4052	21.5226	21.5236	21.2721	21.9604	21.8202	21.9791	21.7356	6	0.00176	21.4309	21.8738	0.44296	1.35939	0.00181
gi|172036498	cce_1583	malonyl coenzyme A-acyl carrier protein transacylase	23.0386	22.8856	22.8947	23.4757	23.7693	23.1398	23.6172	24.0569	7	0.0275	23.0736	23.6458	0.572202	1.48679	0.0519
gi|172036499	cce_1584	3-oxoacyl-[acyl-carrier-protein] synthase III	20.3715	19.659	19.5596	19.4464	20.5272	21.1749	21.4021	21.1612	2	0.00308	19.7591	21.0664	1.30723	2.47465	0.00349
gi|172036500	cce_1585	fatty acid/phospholipid synthesis protein	20.6122	20.5282	20.3153	20.275	20.2638	20.2805	19.9352	20.6013	7	0.134	20.4327	20.2702	-0.162492	0.89348	0.345
gi|172036501	cce_1586	methionine aminopeptidase	20.1457	20.5857	19.7774	20.3544	20.4965	20.1004	20.4241	20.3417	2	0.187	20.2158	20.3407	0.124886	1.09042	0.539
gi|172036502	cce_1587	heat shock protein Hsp40	20.8776	14.465	14.465	20.6857	14.465	21.8775	21.9836	14.465	2	0.182	17.6233	18.1978	0.574446	1.48911	0.51
gi|172036504	cce_1589	unknown	20.6769	20.8884	20.7312	19.7006	20.6265	20.3208	20.7182	19.0201	2	0.184	20.4993	20.1714	-0.327892	0.7967	0.517
gi|172036510	cce_1595	bifunctional proline dehydrogenase/delta-1-pyrroline-5-carboxylate dehydrogenase	22.7791	22.4879	22.3002	22.3933	22.3567	22.7427	22.6541	22.5819	11	0.181	22.4901	22.5839	0.0937254	1.06712	0.506
gi|172036514	cce_1599	photosystem II 13 kD protein	26.8946	26.7557	26.7948	26.5241	26.9858	26.7377	26.9154	27.2131	6	0.0585	26.7423	26.963	0.220703	1.1653	0.13
gi|172036518	cce_1603	glycogen phosphorylase	26.5848	26.5124	26.5756	26.6714	24.9212	24.4489	24.8926	25.2561	4	0.000151	26.586	24.8797	-1.70635	0.306435	5.45e-05
gi|172036524	cce_1609	unknown	21.9594	21.9359	21.5938	21.6298	22.3182	22.0724	21.5863	20.9873	4	0.274	21.7797	21.741	-0.0386862	0.973541	0.905
gi|172036525	cce_1610	unknown	23.321	23.4539	23.188	23.255	22.9416	23.1011	22.9239	22.5709	3	0.0105	23.3045	22.8844	-0.420118	0.747364	0.0154
gi|172036526	cce_1611	putative carbohydrate kinase, PfkB family	23.0952	22.9212	22.9665	23.2197	23.6131	23.7695	23.4932	23.2599	5	0.00668	23.0506	23.5339	0.483309	1.39795	0.00885
gi|172036528	cce_1613	Peptidase M61, glycyl monoaminopeptidase	22.1146	21.7437	22.1296	21.912	22.6644	22.4846	22.4504	22.657	4	0.00155	21.975	22.5641	0.589093	1.5043	0.00155
gi|172036529	cce_1614	branched-chain amino acid aminotransferase	23.7708	23.6113	23.712	24.1915	23.3895	23.2087	23.5172	23.3849	8	0.0131	23.8214	23.3751	-0.446316	0.733915	0.0203
gi|172036534	cce_1619	ammonium transport protein	21.9107	21.8613	22.1724	21.7078	22.7857	22.5983	22.56	22.5328	6	0.000964	21.913	22.6192	0.70617	1.63147	0.000751
gi|172036535	cce_1620	superoxide dismutase	26.2315	26.0487	25.9813	26.4946	27.2915	27.4968	27.3365	27.3167	8	0.000193	26.189	27.3604	1.17135	2.25223	7.93e-05
gi|172036538	cce_1623	transcription termination factor, N utilization substance protein B	20.9408	21.6522	21.318	21.2672	21.3171	21.989	21.6709	20.6038	4	0.246	21.2946	21.3952	0.10063	1.07224	0.771
gi|172036541	cce_1626	ATP-binding protein of ABC transporter	17.65	17.943	17.1752	18.0306	17.6594	18.0235	17.4906	17.8008	2	0.262	17.6997	17.7436	0.043903	1.0309	0.851
gi|172036544	cce_1629	glycogen phosphorylase	27.7461	27.7554	27.7852	27.612	25.7722	25.7769	25.8492	26.1347	39	1.27e-05	27.7247	25.8833	-1.84144	0.279043	1.14e-06
gi|172036564	cce_1649	unknown	28.718	28.7582	28.749	28.7561	28.7993	28.5729	28.68	28.8572	18	0.25	28.7453	28.7274	-0.0179725	0.98762	0.788
gi|172036568	cce_1653	30S ribosomal protein S1	23.035	22.9714	22.7077	23.0734	22.5865	22.2369	22.619	22.3172	11	0.00545	22.9469	22.4399	-0.506972	0.703698	0.00701
gi|172036574	cce_1659	delta-aminolevulinic acid dehydratase	22.5315	23.1198	23.012	23.005	23.9014	23.8646	23.7964	23.8022	15	0.000679	22.9171	23.8411	0.924055	1.89744	0.000452
gi|172036580	cce_1665	2Fe-2S ferredoxin	22.3667	22.2983	22.6552	22.5569	14.465	14.465	14.465	14.465	2	0.000614	22.4693	14.465	-8.00429	0.00389465	0.000399
gi|172036583	cce_1668	putative modulator of DNA gyrase	23.5903	23.5807	23.3853	23.6498	23.4145	23.3945	23.3729	23.6644	11	0.136	23.5515	23.4616	-0.0899611	0.939548	0.352
gi|172036587	cce_1672	unknown	22.1644	21.9402	22.1303	22.3797	22.3995	22.6147	22.7755	22.367	5	0.0157	22.1537	22.5392	0.385513	1.30632	0.0263
gi|172036589	cce_1674	glutamyl-tRNA (Gln) amidotransferase subunit B	24.4094	24.2302	24.3232	24.1146	23.998	23.6507	23.8047	24.0975	18	0.0118	24.2693	23.8877	-0.381625	0.767573	0.0178
gi|172036593	cce_1678	unknown	25.927	25.9292	25.8699	26.0119	14.465	14.465	14.465	14.465	8	8.43e-08	25.9345	14.465	-11.4695	0.000352646	4.27e-10
gi|172036594	cce_1679	GTP-binding protein TypA	24.1746	24.1544	24.259	23.9043	22.6443	22.3943	22.7295	22.2148	16	8.73e-05	24.1231	22.4957	-1.62733	0.323687	2.46e-05
gi|172036622	cce_1707	unknown	25.1502	25.1696	25.016	25.1205	25.1279	24.8572	25.1137	25.2403	3	0.242	25.114	25.0848	-0.0292548	0.979926	0.751
gi|172036625	cce_1710	glutamyl-tRNA (Gln) amidotransferase subunit A	23.5797	23.4623	23.5647	23.7758	23.5635	23.4238	23.4996	23.8588	12	0.282	23.5956	23.5864	-0.00918132	0.993656	0.939
gi|172036637	cce_1722	alanyl-tRNA synthetase	23.3602	23.2792	23.0656	23.2325	22.5098	22.2368	22.38	22.3985	11	0.000151	23.2344	22.3813	-0.853117	0.553587	5.18e-05
gi|172036639	cce_1724	unknown	24.8789	24.749	24.7723	25.222	24.5632	24.4977	24.6168	25.0612	6	0.0973	24.9055	24.6847	-0.220815	0.85808	0.237
gi|172036651	cce_1736	unknown	25.0503	24.9932	24.9391	25.1858	24.4286	24.5473	24.4668	24.9964	14	0.0141	25.0421	24.6098	-0.432309	0.741075	0.0224
gi|172036660	cce_1745	DNA binding protein HU	24.9556	24.9121	24.8961	25.0595	24.8724	24.5876	24.7533	24.9403	8	0.046	24.9558	24.7884	-0.167422	0.890432	0.0982
gi|172036662	cce_1747	photosystem I iron-sulfur center subunit VII	29.7995	29.5698	28.0801	29.5159	30.0563	29.9106	30.0738	30.2767	5	0.0391	29.2413	30.0794	0.83804	1.78762	0.0805
gi|172036668	cce_1753	putative plastid and cyanobacterial ribosomal protein PSRP-3/Ycf65	22.5711	22.2627	21.9145	22.5104	23.379	23.3231	23.2174	22.8959	5	0.00264	22.3146	23.2038	0.889187	1.85213	0.00291
gi|172036673	cce_1758	glutamyl-tRNA synthetase	23.2054	23.1125	23.3	23.326	22.8105	22.7674	22.9193	23.043	11	0.00363	23.236	22.885	-0.350933	0.784077	0.00423
gi|172036677	cce_1762	NADH dehydrogenase subunit J	22.223	22.2073	21.9859	21.5309	22.2735	21.6917	20.9285	21.9116	4	0.156	21.9868	21.7013	-0.285445	0.820488	0.416
gi|172036678	cce_1763	NADH dehydrogenase subunit K	24.0326	23.793	24.4305	24.3453	22.9938	23.4769	23.465	23.5245	9	0.00514	24.1504	23.3651	-0.785295	0.580233	0.00648
gi|172036690	cce_1775	nitrogen regulatory protein P-II	26.2353	26.5344	26.5059	26.4466	26.513	26.1932	26.4228	25.8621	8	0.119	26.4306	26.2478	-0.182796	0.880994	0.297
gi|172036695	cce_1780	unknown	24.8379	24.8072	24.8432	24.4778	24.7777	24.517	24.7059	24.2947	17	0.111	24.7415	24.5738	-0.167707	0.890256	0.275
gi|172036696	cce_1781	3-phosphoshikimate 1-carboxyvinyltransferase	22.3579	22.2192	22.1176	22.3969	20.9869	21.3064	21.2683	21.3809	8	0.000178	22.2729	21.2356	-1.03727	0.48725	7.1e-05
gi|172036704	cce_1789	2,3-bisphosphoglycerate-independent phosphoglycerate mutase	22.8281	22.7355	22.3664	22.4941	22.5067	22.4861	22.6466	22.6778	4	0.257	22.606	22.5793	-0.0267191	0.98165	0.827
gi|172036707	cce_1792	unknown	22.3773	22.0917	21.9474	21.7277	22.7597	23.1412	23.2119	23.2278	10	0.00115	22.036	23.0852	1.04913	2.06928	0.000972
gi|172036714	cce_1799	RNA methyltransferase TrmH, group 3	21.7737	21.7813	21.943	21.8744	20.7661	20.9546	20.5055	20.2975	2	0.000368	21.8431	20.6309	-1.2122	0.431609	0.000191
gi|172036716	cce_1801	unknown	25.0048	24.7304	24.5891	24.5414	24.5593	25.0278	24.6351	25.0449	6	0.193	24.7164	24.8168	0.100351	1.07203	0.565
gi|172036721	cce_1806	putative glycoside hydrolase, family 13	14.465	14.465	14.465	18.7551	20.1993	20.184	14.465	14.465	3	0.245	15.5375	17.3283	1.79078	3.46001	0.765
gi|172036725	cce_1810	glutaredoxin-related protein	23.6486	14.465	23.5975	23.1578	17.5263	21.3558	21.4069	24.735	3	0.0849	21.2172	21.256	0.0387431	1.02722	0.201
gi|172036726	cce_1811	putative BolA-like protein	26.2095	26.0962	26.1027	26.1138	25.6832	25.8216	25.8499	25.8599	5	0.000758	26.1306	25.8037	-0.326909	0.797243	0.000538
gi|172036737	cce_1822	S-adenosylmethionine synthetase	27.3007	27.2666	27.4017	27.5268	27.6889	27.6952	27.6843	27.8146	21	0.00187	27.374	27.7207	0.346777	1.27172	0.00196
gi|172036743	cce_1828	acyl-[acyl-carrier-protein]--UDP-N- acetylglucosamine o-acyltransferase	22.2993	22.0379	22.0759	22.4297	22.6765	22.3901	22.686	22.2509	3	0.042	22.2107	22.5009	0.29016	1.22278	0.0879
gi|172036744	cce_1829	lipid A disaccharide synthase	22.0444	21.465	21.6998	22.1761	21.7136	21.8764	22.1011	22.031	4	0.22	21.8463	21.9305	0.0842252	1.06012	0.662
gi|172036745	cce_1830	lipid A disaccharide synthase	22.1262	21.8369	21.8661	22.0758	22.1542	22.1068	22.1423	22.0954	6	0.0439	21.9762	22.1246	0.148399	1.10834	0.0929
gi|172036752	cce_1837	photosystem II CP47 protein, 47 kD chlorophyll-binding protein	26.4707	26.4798	26.5444	26.5918	27.0532	27.1426	27.053	26.7839	19	0.00121	26.5217	27.0082	0.486526	1.40107	0.00107
gi|172036754	cce_1839	translation initiation factor IF-2	24.6891	24.2978	24.5394	24.8738	23.575	23.6943	23.88	23.9518	32	0.0015	24.6	23.7753	-0.82472	0.564592	0.00147
gi|172036756	cce_1841	transcription termination factor, N utilization substance protein	25.1972	25.1276	25.1796	25.0577	25.142	25.0364	25.1967	25.4866	10	0.176	25.1405	25.2154	0.0748939	1.05328	0.488
gi|172036758	cce_1843	putative terpenoid synthase	19.4489	14.465	18.4338	19.0816	20.7532	20.7312	20.5866	20.7133	2	0.189	17.8573	20.6961	2.83875	7.15401	0.548
gi|172036759	cce_1844	unknown	21.8991	21.8626	22.2235	22.466	19.0497	14.465	14.465	14.465	5	0.287	22.1128	15.6112	-6.50166	0.0110358	0.963
gi|172036764	cce_1849	NADH dehydrogenase subunit M	24.1502	24.0559	24.1763	24.0864	24.2683	24.1336	24.0839	22.5629	3	0.155	24.1172	23.7622	-0.355054	0.781841	0.412
gi|172036765	cce_1850	malate dehydrogenase	21.7196	22.3956	21.4545	22.429	21.8922	22.033	22.1814	22.1985	2	0.246	21.9997	22.0763	0.0766342	1.05455	0.774
gi|172036769	cce_1854	unknown	20.3364	20.8276	20.5775	20.5784	18.7519	14.465	14.465	14.465	2	0.0988	20.58	15.5367	-5.04325	0.030327	0.241
gi|172036779	cce_1864	DNA polymerase III beta subunit	18.2454	19.6309	19.3713	14.465	19.7493	19.561	20.6059	20.5532	4	0.295	17.9281	20.1173	2.18919	4.5605	1
gi|172036794	cce_1879	probable soluble lytic transglycosylase	20.4553	19.4909	20.5859	21.0752	19.799	19.2063	19.7143	19.6781	4	0.0333	20.4018	19.5994	-0.802403	0.573394	0.0659
gi|172036804	cce_1889	unknown	24.1457	24.1309	24.3984	24.1525	23.3956	24.213	24.0363	24.8035	5	0.245	24.2069	24.1121	-0.0947673	0.936423	0.76
gi|172036805	cce_1890	unknown	24.0156	24.1309	24.1985	24.2584	23.8868	24.213	24.4316	24.8031	6	0.15	24.1509	24.3337	0.182783	1.13507	0.394
gi|172036806	cce_1891	unknown	24.1937	24.0949	24.3811	23.963	22.537	22.7005	23.2184	22.9009	2	0.000426	24.1582	22.8392	-1.319	0.400813	0.00025
gi|172036814	cce_1899	SOS function regulatory protein	22.6965	19.5303	22.1078	22.3419	20.7029	22.3656	22.9493	21.9321	3	0.236	21.6691	21.9875	0.318369	1.24692	0.726
gi|172036815	cce_1900	citrate synthase	23.07	23.1296	22.9796	22.2816	23.8513	23.8228	23.7711	23.0227	2	0.0204	22.8652	23.617	0.751787	1.68388	0.0362
gi|172036823	cce_1908	conserved hypothetical protein	22.4962	22.7067	22.126	22.5026	19.9517	19.5353	19.5567	14.465	4	0.0312	22.4579	18.3772	-4.08069	0.0591004	0.0611
gi|172036825	cce_1910	ATP-dependent Clp protease, proteolytic subunit	26.2296	26.1832	26.1673	26.2349	25.5995	25.3922	25.5675	25.5441	11	4.69e-05	26.2037	25.5258	-0.677905	0.625072	8.82e-06
gi|172036826	cce_1911	ATP-dependent Clp protease, proteolytic subunit	25.6722	25.6069	25.6284	25.3512	25.1661	25.2094	24.9813	24.6031	11	0.00752	25.5646	24.99	-0.574669	0.67144	0.0103
gi|172036829	cce_1914	unknown	22.1005	21.7585	21.522	21.8323	20.6131	19.9684	20.0293	20.3626	2	0.000367	21.8033	20.2434	-1.55995	0.339162	0.000187
gi|172036837	cce_1922	unknown	21.8018	21.463	21.9938	21.8949	20.132	20.539	19.2504	19.3864	3	0.00115	21.7884	19.8269	-1.96145	0.25677	0.000972
gi|172036848	cce_1933	unknown	21.9216	21.6108	21.2797	21.7857	21.1824	21.1259	21.671	21.8452	2	0.157	21.6495	21.4561	-0.193319	0.874592	0.425
gi|172036856	cce_1941	ATP-dependent Clp protease, ATP-binding subunit	25.679	25.7352	25.4786	25.4001	23.8751	24.3391	24.4941	24.5003	7	0.000456	25.5732	24.3022	-1.27105	0.414359	0.000271
gi|172036859	cce_1944	phycobilisome core component	26.5479	26.5246	26.5569	26.3109	27.444	27.5059	27.6333	27.7032	13	5.81e-05	26.4851	27.5716	1.08654	2.12365	1.23e-05
gi|172036860	cce_1945	preprotein translocase subunit SecA	24.8738	24.7115	24.7052	24.7278	24.3473	24.1747	24.35	24.4733	34	0.00132	24.7546	24.3363	-0.418215	0.74835	0.00125
gi|172036861	cce_1946	methionyl-tRNA synthetase	23.079	23.2106	23.0722	22.9939	22.424	22.4171	22.3356	22.7679	7	0.00134	23.0889	22.4862	-0.602757	0.658495	0.00128
gi|172036868	cce_1953	cell division protein	22.9995	22.5161	22.3721	22.5701	22.2579	22.6015	22.7373	22.3081	5	0.17	22.6144	22.4762	-0.138245	0.908624	0.466
gi|172036869	cce_1954	light-independent protochlorophyllide reductase, B subunit	22.7244	22.7896	22.7845	22.9608	24.2423	24.5972	24.768	24.1977	4	0.000102	22.8148	24.4513	1.63646	3.10902	3.18e-05
gi|172036876	cce_1961	GTP-binding protein	20.6409	20.0714	20.3903	20.2735	14.465	18.8637	19.0698	19.6873	2	0.269	20.344	18.0214	-2.32259	0.199908	0.88
gi|172036887	cce_1972	protein involved in disulfide bond formation	21.5218	21.4032	21.5836	20.8584	21.7726	21.1688	21.0948	21.2804	3	0.286	21.3418	21.3291	-0.0126148	0.991294	0.957
gi|172036888	cce_1973	photosystem I biogenesis protein	23.6423	23.8209	23.7199	23.4695	23.6712	23.7898	23.9061	23.683	6	0.127	23.6631	23.7625	0.0993702	1.07131	0.323
gi|172036893	cce_1978	unknown	22.8587	21.429	22.9439	23.107	21.1852	21.5959	21.922	22.6228	2	0.0762	22.5847	21.8315	-0.753198	0.593287	0.178
gi|172036915	cce_2000	rod shape-determining protein	23.3941	23.7858	23.7187	23.1188	24.2174	24.415	24.0801	23.8651	17	0.0108	23.5044	24.1444	0.640041	1.55837	0.0161
gi|172036916	cce_2001	single-stranded DNA-binding protein	24.151	24.502	24.1689	23.6116	24.4185	25.0561	25.1608	21.9791	4	0.286	24.1084	24.1536	0.0452371	1.03185	0.955
gi|172036918	cce_2003	heat shock protein Hsp70	27.6524	27.7356	27.7633	27.8419	27.4584	27.4467	27.3574	27.1924	35	0.00179	27.7483	27.3637	-0.384596	0.765993	0.00186
gi|172036928	cce_2013	DUF1092-containing protein	18.4199	18.6987	18.8958	18.8743	19.2527	19.2281	19.2698	18.9346	2	0.0108	18.7222	19.1713	0.449116	1.3652	0.0162
gi|172036931	cce_2016	acetyl-coenzyme A synthetase	23.5531	23.666	23.6996	23.7567	24.7018	24.6012	24.612	24.637	23	1.18e-05	23.6688	24.638	0.969175	1.95772	1.01e-06
gi|172036941	cce_2026	CobB/CobQ-like glutamine amidotransferase	20.0326	19.9767	19.847	19.155	14.465	22.4191	14.465	19.4743	3	0.0235	19.7528	17.7059	-2.04696	0.241994	0.0431
gi|172036949	cce_2034	unknown	21.534	20.4331	20.2069	14.465	14.465	20.4597	20.9346	19.4657	3	0.241	19.1597	18.8312	-0.328505	0.796361	0.745
gi|172036953	cce_2038	carbamoyl-phosphate synthase, large subunit	24.737	25.0118	24.6459	24.658	23.8776	23.6665	23.8316	23.4136	33	0.000401	24.7632	23.6973	-1.06582	0.477702	0.000221
gi|172036954	cce_2039	putative six-hairpin glycosidase familly protein	22.0242	22.1116	21.7911	22.0097	21.6175	21.056	21.4535	21.4272	6	0.00395	21.9842	21.3885	-0.595611	0.661764	0.0048
gi|172036958	cce_2043	cell division protein	23.2681	25.5949	25.7754	25.8973	25.8524	25.6773	26.019	25.3433	6	0.15	25.1339	25.723	0.589072	1.50428	0.394
gi|172036966	cce_2051	elongation factor EF-G	26.0391	25.9751	26.0484	26.1265	24.9723	24.964	24.9716	25.375	36	0.000216	26.0473	25.0707	-0.976546	0.508195	9.27e-05
gi|172036967	cce_2052	DUF1517-containing protein	23.6863	23.7242	23.5751	23.7472	23.5935	23.6471	23.7074	23.5172	3	0.111	23.6832	23.6163	-0.066914	0.954678	0.274
gi|172036977	cce_2062	putative aldose 1-epimerase	22.6953	23.0907	23.2924	23.2562	22.4107	22.6697	22.6021	22.2221	2	0.00832	23.0836	22.4761	-0.607517	0.656326	0.0117
gi|172036991	cce_2076	UDP-N-acetylglucosamine pyrophosphorylase	20.9116	20.8199	20.9899	20.8092	20.5204	20.1534	19.163	20.0601	3	0.0132	20.8827	19.9742	-0.908411	0.532772	0.0206
gi|172036997	cce_2082	acetyl-CoA carboxylase beta subunit	23.055	23.007	22.9815	23.1196	22.4079	22.4658	22.6478	22.6577	6	0.000623	23.0408	22.5448	-0.495981	0.709079	0.000408
gi|172036999	cce_2084	putative macrophage migration inhibitory factor	25.3133	25.1084	25.2461	25.5896	24.8552	25.1013	25.2505	25.3847	4	0.125	25.3143	25.1479	-0.166413	0.891056	0.316
gi|172037000	cce_2085	unknown	23.5374	23.696	23.825	23.5698	23.663	24.1361	23.5395	24.1923	4	0.102	23.6571	23.8827	0.22564	1.1693	0.251
gi|172037003	cce_2088	unknown	19.8927	21.6689	19.8637	21.1299	21.0679	20.8859	20.6182	21.0915	2	0.195	20.6388	20.9159	0.277061	1.21172	0.574
gi|172037035	cce_2120	ketol-acid reductoisomerase	26.9253	26.8419	26.7115	26.9008	26.0075	26.1099	26.1181	26.2056	21	8.61e-05	26.8449	26.1103	-0.734596	0.600986	2.32e-05
gi|172037037	cce_2122	elongation factor P	25.5718	25.4587	25.5077	26.0057	25.3697	24.8198	25.4358	25.6509	9	0.0826	25.636	25.319	-0.316929	0.802777	0.194
gi|172037045	cce_2130	tryptophan synthase alpha subunit	22.4658	22.8212	23.0388	22.5731	22.3172	22.3559	22.4165	22.2402	5	0.0157	22.7247	22.3324	-0.392284	0.761923	0.0261
gi|172037049	cce_2134	D-3-phosphoglycerate dehydrogenase	26.0669	26.0828	26.0715	26.0977	25.3945	25.2987	25.4155	25.6726	36	0.000401	26.0797	25.4453	-0.634418	0.644201	0.000217
gi|172037056	cce_2141	TRAP dicarboxylate transporter, DctP subunit	14.465	19.8043	19.6085	19.2748	19.1465	20.6817	20.761	18.45	2	0.187	18.2882	19.7598	1.47163	2.77334	0.538
gi|172037071	cce_2156	enolase	26.228	26.1236	26.1513	26.33	25.1111	25.1701	25.0692	25.0685	19	1.02e-05	26.2082	25.1047	-1.10351	0.465384	7.17e-07
gi|172037072	cce_2157	unknown	23.8681	23.6918	23.5665	23.9074	25.3886	25.1325	25.3039	25.0341	7	6.1e-05	23.7585	25.2148	1.45631	2.74405	1.34e-05
gi|172037085	cce_2170	polyphosphate kinase	19.3722	19.8254	19.4989	19.815	19.7024	20.009	19.0673	19.1945	4	0.205	19.6279	19.4933	-0.134608	0.910917	0.606
gi|172037086	cce_2171	peptidyl-prolyl cis-trans isomerase B	26.822	26.9247	26.7944	26.7533	26.6481	26.4024	26.4332	26.7934	13	0.0235	26.8236	26.5693	-0.254317	0.838384	0.0432
gi|172037087	cce_2172	photosystem I assembly protein	22.3712	22.0152	22.3595	22.5071	21.899	21.5746	21.8205	21.5244	3	0.0039	22.3132	21.7046	-0.608577	0.655843	0.00471
gi|172037114	cce_2199	conserved hypothetical protein	26.6837	26.5076	26.7732	26.7504	26.8068	26.8087	26.582	26.6917	7	0.205	26.6787	26.7223	0.0435845	1.03067	0.61
gi|172037115	cce_2200	putative YCF41	25.3749	25.164	25.2562	25.159	24.4146	24.7791	24.8373	25.2103	6	0.0247	25.2385	24.8103	-0.428189	0.743194	0.0459
gi|172037116	cce_2201	hypothetical protein cce_2201	21.0822	21.5484	21.3593	21.0283	21.0072	21.7175	21.1267	21.8022	2	0.186	21.2545	21.4134	0.158848	1.1164	0.526
gi|172037118	cce_2203	rfrA family pentapeptide repeat	20.0984	19.7175	19.0282	19.7665	20.2391	20.4321	20.6115	20.8056	2	0.00997	19.6527	20.5221	0.869406	1.82691	0.0144
gi|172037119	cce_2204	hypothetical protein cce_2204	21.5382	21.4952	22.0002	20.7399	22.8021	22.827	22.2618	21.9328	6	0.0151	21.4434	22.4559	1.01253	2.01744	0.0246
gi|172037130	cce_2215	probable retinal pigment epithelial membrane protein	20.6798	21.0439	21.4159	21.5876	20.747	19.608	19.9754	20.5308	2	0.0156	21.1818	20.2153	-0.966509	0.511743	0.026
gi|172037138	cce_2223	NADH dehydrogenase subunit I	25.128	25.092	25.154	25.0242	24.7558	24.8361	24.8475	24.9303	9	0.00135	25.0996	24.8424	-0.257154	0.836737	0.00131
gi|172037140	cce_2225	phosphoketolase	24.016	23.7555	23.9419	23.8882	24.1664	24.3707	24.2731	24.4346	14	0.00204	23.9004	24.3112	0.410811	1.32943	0.00219
gi|172037151	cce_2236	cyanophycinase	23.9469	24.0707	23.8566	23.8082	24.1399	24.1145	24.1638	23.9078	3	0.0461	23.9206	24.0815	0.160899	1.11798	0.0985
gi|172037152	cce_2237	cyanophycin synthetase	23.9121	23.9072	23.9127	24.0787	22.4818	22.7727	22.9252	22.707	20	7.5e-05	23.9527	22.7217	-1.23101	0.426019	1.88e-05
gi|172037163	cce_2248	1,4-alpha-glucan branching enzyme	21.5121	21.8156	21.3877	21.7272	19.5998	20.6931	19.8036	21.1723	5	0.0103	21.6107	20.3172	-1.29348	0.407967	0.015
gi|172037165	cce_2250	unknown	23.2353	23.3362	23.576	22.8928	24.4828	24.5309	24.4734	24.0354	3	0.00108	23.2601	24.3806	1.12052	2.17426	0.000867
gi|172037168	cce_2253	mannose-1-phosphate guanylyltransferase	23.9429	23.8016	23.9561	24.0093	23.4995	23.7675	23.6575	24.0119	11	0.0656	23.9275	23.7341	-0.193381	0.874554	0.148
gi|172037170	cce_2255	DNA polymerase I	14.465	18.8215	18.29	18.4591	14.465	14.465	14.465	14.465	2	0.0157	17.5089	14.465	-3.04392	0.121252	0.0263
gi|172037172	cce_2257	beta-carbonic anhydrase, carboxysomal	21.3887	21.013	21.9144	22.101	21.4236	21.4868	21.2495	22.2194	7	0.29	21.6043	21.5948	-0.00945443	0.993468	0.978
gi|172037197	cce_2282	asparaginyl-tRNA synthetase	23.101	23.0474	22.8802	22.9754	22.2423	21.8818	21.8714	21.6875	7	0.000289	23.001	21.9208	-1.08021	0.472959	0.000136
gi|172037206	cce_2291	processing protease	22.0459	21.1956	21.3672	21.968	21.072	21.6137	21.5217	21.7224	7	0.19	21.6442	21.4825	-0.161709	0.893965	0.552
gi|172037213	cce_2298	adenine phosphoribosyltransferase	21.0403	21.6651	21.8104	21.1897	21.5831	21.5103	21.3239	21.6742	3	0.215	21.4264	21.5229	0.0964826	1.06916	0.645
gi|172037220	cce_2305	indole-3-glycerol phosphate synthase	19.4496	19.37	19.2276	19.113	20.3924	20.5327	20.3198	20.1674	2	0.00016	19.29	20.3531	1.06306	2.08936	5.9e-05
gi|172037227	cce_2312	4-hydroxy-3-methylbut-2-en-1-yl diphosphate synthase	22.189	22.3619	22.4348	22.9296	22.7001	22.8374	22.5806	22.7224	5	0.0902	22.4788	22.7101	0.231324	1.17391	0.216
gi|172037229	cce_2314	histidinol dehydrogenase	23.0841	22.8884	23.0805	23.0497	21.8479	21.4594	21.8376	22.0124	9	0.000166	23.0257	21.7893	-1.23634	0.424449	6.42e-05
gi|172037239	cce_2324	heme oxygenase	25.17	25.2087	25.0916	25.1272	25.5331	25.3532	25.5314	25.5992	20	0.00112	25.1494	25.5042	0.354859	1.27886	0.000917
gi|172037250	cce_2335	DNA helicase	25.1211	24.7571	24.6398	24.7415	24.6339	24.6613	24.5815	25.0526	2	0.204	24.8149	24.7323	-0.082578	0.944369	0.604
gi|172037269	cce_2354	unknown	20.0081	21.0819	20.3019	20.6866	14.465	14.465	14.465	18.3828	2	0.115	20.5196	15.4444	-5.0752	0.0296629	0.287
gi|172037271	cce_2356	putative secretion protein, HlyD family	20.0742	21.4748	21.1614	21.2338	21.7241	21.0156	20.8933	20.5573	5	0.269	20.986	21.0476	0.0615268	1.04357	0.882
gi|172037272	cce_2357	putative succinyl-CoA synthetase beta chain	19.7901	18.9109	19.5676	14.465	19.9064	17.8009	18.5513	14.465	3	0.236	18.1834	17.6809	-0.502519	0.705873	0.724
gi|172037274	cce_2359	homoserine dehydrogenase	21.108	21.0478	20.9897	21.0381	20.3151	20.3149	20.6103	20.6023	4	0.000758	21.0459	20.4607	-0.58526	0.666529	0.000543
gi|172037286	cce_2371	unknown	22.7239	22.902	22.8444	22.5129	22.6949	22.3355	22.5627	22.1338	4	0.0399	22.7458	22.4317	-0.31405	0.80438	0.0826
gi|172037288	cce_2373	UDP-N-acetylmuramate-alanine ligase	20.6895	14.465	20.396	22.306	19.9215	20.5849	20.0133	20.5272	3	0.0424	19.4641	20.2617	0.797612	1.73822	0.0889
gi|172037292	cce_2378	UDP-3-O-acyl-N-acetylglucosamine deacetylase	20.013	20.278	20.2188	19.7963	20.3367	20.5023	20.6805	20.1596	3	0.0352	20.0765	20.4198	0.343229	1.26859	0.0704
gi|172037293	cce_2379	bacterial surface antigen D15-like protein	22.3286	22.6236	22.5202	22.2459	22.7949	22.6159	22.8113	22.7834	10	0.011	22.4296	22.7514	0.32181	1.2499	0.0166
gi|172037297	cce_2383	gamma-glutamyl phosphate reductase	20.7276	20.8089	21.0658	20.7054	20.1214	20.4804	20.5521	20.1164	2	0.00828	20.8269	20.3176	-0.509338	0.702545	0.0116
gi|172037304	cce_2390	thioredoxin M	23.295	22.9308	22.9873	22.9865	22.9123	22.7646	22.7344	22.9142	2	0.0317	23.0499	22.8314	-0.218516	0.859449	0.0621
gi|172037305	cce_2391	glucosylglycerol-phosphate synthase	26.5451	26.6458	26.6584	26.7201	26.4973	26.4614	26.5577	26.815	27	0.185	26.6424	26.5828	-0.0595272	0.959579	0.523
gi|172037321	cce_2407	unknown	23.3138	22.9179	22.9073	23.6448	21.0813	21.5677	21.7824	22.4443	3	0.00375	23.196	21.7189	-1.47702	0.359231	0.00444
gi|172037322	cce_2408	unknown	24.8141	25.3269	24.8481	25.668	24.3752	24.0964	24.0609	24.4105	5	0.00483	25.1643	24.2357	-0.928526	0.525395	0.00606
gi|172037323	cce_2409	thioredoxin peroxidase	21.5376	21.6866	21.6691	20.817	22.5762	22.1216	22.5427	21.8319	3	0.0138	21.4276	22.2681	0.840517	1.79069	0.0216
gi|172037325	cce_2411	unknown	21.7815	21.9453	21.3553	21.9934	21.5292	21.8654	21.909	21.7847	2	0.292	21.7689	21.7721	0.00322216	1.00224	0.985
gi|172037326	cce_2412	3-oxoacyl-[acyl-carrier protein] reductase	22.7944	22.9638	22.6217	22.7137	23.2857	23.1498	23.3838	22.8544	7	0.0161	22.7734	23.1684	0.395003	1.31495	0.0273
gi|172037343	cce_2430	peptide methionine sulfoxide reductase	22.6891	21.6615	20.9544	21.2522	21.3652	22.7053	22.02	22.279	3	0.143	21.6393	22.0924	0.453114	1.36899	0.374
gi|172037346	cce_2433	carbon dioxide concentrating mechanism protein	23.453	23.6728	23.5537	22.877	24.5539	23.7949	24.1377	23.5382	6	0.0355	23.3891	24.0062	0.617051	1.53374	0.0713
gi|172037347	cce_2434	carbon dioxide concentrating mechanism protein	22.1707	22.6166	22.5159	23.2204	23.0761	22.5727	22.9867	23.4755	5	0.0901	22.6309	23.0278	0.39689	1.31667	0.215
gi|172037357	cce_2444	ThiamineS-like protein	23.3478	23.4103	23.6158	23.4419	24.0787	24.3447	24.0244	23.2836	2	0.0418	23.4539	23.9329	0.478934	1.39371	0.0872
gi|172037359	cce_2446	threonine synthase	23.0338	22.9451	23.1658	22.7233	24.3433	24.337	24.2115	24.5696	15	8.61e-05	22.967	24.3653	1.39836	2.63601	2.31e-05
gi|172037362	cce_2449	unknown	23.7093	23.9001	24.0099	23.6341	23.3026	23.0664	23.2006	22.0385	15	0.0148	23.8134	22.902	-0.911338	0.531692	0.0242
gi|172037367	cce_2454	phosphoglycerate mutase	21.4464	21.8112	21.2492	21.0671	21.6726	22.1276	22.2846	21.891	5	0.0164	21.3935	21.9939	0.600472	1.51621	0.028
gi|172037374	cce_2461	glucose inhibited division protein A	20.2857	14.465	19.5221	20.8025	18.7551	18.8093	18.8637	20.2847	3	0.0418	18.7688	19.1782	0.409394	1.32813	0.0873
gi|172037380	cce_2467	N-acetylmuramoyl-L-alanine amidase	23.1082	23.0578	23.1697	22.7958	22.0307	22.364	22.4	22.4886	10	0.00154	23.0329	22.3208	-0.712069	0.610444	0.00153
gi|172037388	cce_2475	septum site-determining protein	22.9406	23.0393	22.8023	22.8467	22.622	22.7568	22.3687	22.3481	7	0.00997	22.9072	22.5239	-0.383307	0.766678	0.0144
gi|172037389	cce_2476	septum site-determining protein	21.1729	21.0837	21.0551	20.4746	19.9088	14.465	19.4187	18.9383	3	0.19	20.9466	18.1827	-2.76389	0.147226	0.55
gi|172037398	cce_2485	photosystem II D2 protein	26.4361	26.5733	26.2301	26.5401	26.9023	26.7261	26.9884	26.8475	5	0.00371	26.4449	26.8661	0.421183	1.33903	0.00438
gi|172037439	cce_2526	bacterial stress protein	20.556	20.515	21.3078	20.8892	22.6207	22.4127	22.4318	21.7904	3	0.00124	20.817	22.3139	1.49693	2.82241	0.00114
gi|172037440	cce_2527	bacterial stress protein	20.556	20.515	21.3078	20.8892	22.6973	22.2534	22.3493	21.8956	4	0.00115	20.817	22.2989	1.48192	2.7932	0.000962
gi|172037448	cce_2535	OxPPCycle protein glucose-6-P dehydrogenase subunits	25.2876	25.0847	25.1829	25.2114	23.1071	23.0425	23.0888	22.9615	16	7.87e-07	25.1916	23.05	-2.14166	0.226619	1.54e-08
gi|172037449	cce_2536	glucose-6-phosphate dehydrogenase	25.7621	25.7619	25.8381	25.5897	23.9618	24.0523	23.7303	23.6955	21	1.49e-05	25.738	23.86	-1.87799	0.272062	1.64e-06
gi|172037462	cce_2549	glucose-1-phosphate thymidylyltransferase	22.6534	22.6362	22.4201	22.4388	22.62	21.4495	21.4923	22.5505	6	0.074	22.5371	22.0281	-0.509042	0.702689	0.172
gi|172037465	cce_2552	unknown	23.8217	23.7586	23.912	23.7384	23.3457	23.4118	23.3387	22.9013	19	0.00347	23.8077	23.2494	-0.558299	0.679103	0.00402
gi|172037468	cce_2555	putative short-chain dehydrogenase/reductase SDR	20.8805	22.3756	22.0468	21.9065	22.724	22.2461	22.0151	21.4479	6	0.177	21.8023	22.1083	0.305926	1.23621	0.491
gi|172037474	cce_2561	unknown	20.2478	20.8405	21.2064	20.7954	22.0452	22.0219	22.3608	21.6244	2	0.00226	20.7725	22.0131	1.24052	2.36283	0.00248
gi|172037481	cce_2568	ferrochelatase	22.3853	22.3924	22.0199	22.1447	22.5578	22.1526	22.2689	22.5339	5	0.131	22.2356	22.3783	0.142725	1.10399	0.334
gi|172037485	cce_2572	photosystem II manganese-stabilizing polypeptide, 33 kD extrinsic protein	27.7587	27.7093	27.7388	27.612	28.152	28.1341	27.9858	28.1271	20	0.000401	27.7047	28.0997	0.395048	1.31499	0.000225
gi|172037486	cce_2573	heme oxygenase (decyclizing)	21.464	21.9459	21.9909	21.3844	23.8951	23.844	23.6409	23.4579	6	0.000121	21.6963	23.7095	2.01315	4.03663	3.83e-05
gi|172037491	cce_2578	translation initiation factor IF-3	22.2691	22.4017	22.372	22.4884	21.5166	21.1575	21.3543	19.8289	7	0.00774	22.3828	20.9643	-1.41847	0.374109	0.0107
gi|172037493	cce_2580	probable flavoprotein	19.3701	19.677	19.9275	20.1887	20.5876	20.3481	20.3806	20.5451	5	0.00774	19.7908	20.4653	0.674555	1.5961	0.0107
gi|172037507	cce_2594	unknown	19.7303	19.8982	20.1638	19.965	19.5181	19.2292	19.4929	19.4034	2	0.00279	19.9393	19.4109	-0.528422	0.693313	0.00312
gi|172037518	cce_2605	aminotransferase, class I and II	25.1599	25.0078	25.1847	25.0378	25.3544	25.1382	25.0124	25.1223	17	0.181	25.0976	25.1568	0.0592309	1.04191	0.507
gi|172037520	cce_2607	putative L-cysteine/cystine lyase	20.7437	20.9323	20.8319	21.159	20.9104	20.7794	20.261	20.1287	3	0.0503	20.9167	20.5199	-0.396874	0.759502	0.109
gi|172037522	cce_2609	glycine cleavage system protein P	22.5033	22.0434	21.9106	22.4047	22.1256	21.435	21.6175	21.8294	8	0.0328	22.2155	21.7519	-0.463632	0.725158	0.0646
gi|172037523	cce_2610	probable glycerol-3-phosphate dehydrogenase	24.3969	24.5434	24.4292	24.1509	24.5388	24.4269	24.3701	23.9368	15	0.231	24.3801	24.3181	-0.0619589	0.957963	0.704
gi|172037532	cce_2619	ABC transporter, substrate binding protein, possibly oligopeptides	23.5196	23.1425	23.1904	23.23	23.0443	23.045	22.6228	22.6852	6	0.0151	23.2706	22.8493	-0.421308	0.746747	0.0249
gi|172037538	cce_2625	photosystem II 12 kD extrinsic protein	26.5471	26.5468	26.5502	26.5813	26.7541	26.7782	26.7932	26.8601	13	0.000162	26.5563	26.7964	0.240066	1.18105	6.07e-05
gi|172037540	cce_2627	dihydroorotase	19.1024	18.9629	18.545	19.3819	18.4302	18.5938	17.5545	18.6405	2	0.0332	18.998	18.3047	-0.693294	0.61844	0.0655
gi|172037542	cce_2629	unknown	22.9663	22.8791	22.7607	22.4107	22.263	22.5709	22.4323	22.5197	4	0.0348	22.7542	22.4465	-0.307712	0.807922	0.0694
gi|172037544	cce_2631	unknown	23.1931	23.2969	23.2804	23.4807	23.0206	23.2662	23.3006	22.938	2	0.0642	23.3128	23.1313	-0.181417	0.881837	0.144
gi|172037545	cce_2632	iron transport protein	26.9732	26.9959	26.9003	27.0096	23.672	23.4612	23.5776	23.5874	20	8.43e-08	26.9697	23.5745	-3.39518	0.0950491	6.6e-10
gi|172037553	cce_2640	unknown	21.0116	21.3432	21.165	21.1515	21.6254	21.4714	21.7255	21.8722	5	0.00304	21.1678	21.6736	0.505795	1.41991	0.00343
gi|172037556	cce_2643	glycine cleavage system protein H	23.9056	23.987	23.7479	23.695	23.9621	23.899	23.8797	23.7832	4	0.193	23.8339	23.881	0.0471082	1.03319	0.565
gi|172037559	cce_2646	putative S6 modification enzyme	24.0104	24.4843	24.2183	24.2626	24.1332	24.1742	24.3148	24.295	6	0.272	24.2439	24.2293	-0.0145902	0.989938	0.896
gi|172037561	cce_2648	probable lipoxygenase	20.4047	20.4913	19.1105	14.465	19.9965	19.8175	18.4358	19.454	4	0.0807	18.6179	19.426	0.808124	1.75093	0.189
gi|172037564	cce_2651	phycocyanin beta subunit	30.5901	30.4365	30.5514	30.8128	31.3582	31.5327	31.6122	31.8411	45	0.000423	30.5977	31.586	0.988326	1.98388	0.000242
gi|172037565	cce_2652	phycocyanin alpha subunit	30.805	30.5604	30.6795	31.0858	31.7608	32.011	31.9471	32.3051	66	0.000435	30.7827	32.006	1.22336	2.3349	0.000257
gi|172037566	cce_2653	phycocyanin associated linker protein	25.8623	25.9614	26.0248	25.7459	27.6245	27.8693	27.8954	27.7369	15	9.86e-06	25.8986	27.7815	1.88289	3.68814	6.56e-07
gi|172037567	cce_2654	phycocyanin associated linker protein	27.6964	27.8357	27.8221	27.6152	28.6685	28.6366	28.599	28.8204	30	5.81e-05	27.7423	28.6811	0.938795	1.91693	1.22e-05
gi|172037568	cce_2655	phycocyanin associated linker protein	26.575	26.5177	26.4196	26.538	27.9731	27.944	28.0577	28.1762	13	6.16e-06	26.5126	28.0378	1.52519	2.87824	2.9e-07
gi|172037569	cce_2656	phycocyanin alpha phycocyanobilin lyase	18.5671	18.0718	18.1025	18.7538	18.692	18.7637	18.7421	18.1523	2	0.144	18.3738	18.5875	0.213708	1.15967	0.377
gi|172037570	cce_2657	putative transketolase	20.3615	20.1484	20.0047	19.9312	19.6168	19.6248	19.6715	22.2327	2	0.252	20.1115	20.2864	0.174989	1.12896	0.799
gi|172037571	cce_2658	glucose-1-phosphate adenylyltransferase	24.7528	24.7321	25.0168	24.9031	25.5936	25.4214	25.7475	26.0204	2	0.00121	24.8512	25.6957	0.844521	1.79567	0.00107
gi|172037580	cce_2667	molybdopterin biosynthesis MoeB protein	25.4581	25.3509	25.292	25.3346	24.751	24.697	24.7096	24.6054	11	4.15e-05	25.3589	24.6907	-0.668156	0.62931	7.38e-06
gi|172037603	cce_2690	DegT/DnrJ/EryC1/StrS aminotransferase family enzyme	22.8859	22.8019	22.6562	22.5921	22.4107	22.7651	22.5208	22.5936	4	0.0691	22.734	22.5725	-0.161485	0.894104	0.158
gi|172037607	cce_2694	unknown	21.9468	22.0459	21.5216	21.904	20.209	21.0462	19.6042	21.1999	2	0.0098	21.8546	20.5148	-1.33976	0.395086	0.014
gi|172037614	cce_2701	unknown	22.9497	21.4512	22.8894	22.4792	21.2853	23.5664	23.5082	24.0145	8	0.149	22.4424	23.0936	0.65121	1.57049	0.391
gi|172037632	cce_2719	flavin oxidoreductase/NADH oxidase	22.5151	22.7404	22.3336	22.4797	21.332	21.0478	21.2907	19.6542	2	0.0048	22.5172	20.8312	-1.68606	0.310775	0.006
gi|172037638	cce_2725	30s ribosomal protein S6	26.054	26.1793	25.9035	26.1699	25.656	25.6268	25.6755	26.0511	6	0.0195	26.0767	25.7523	-0.324332	0.798668	0.0344
gi|172037644	cce_2731	probable cyclopropane-fatty-acyl-phospholipid synthase	18.6259	19.8066	20.0071	14.465	22.1052	21.9074	21.0829	20.8499	2	0.132	18.2262	21.4864	3.2602	9.58117	0.338
gi|172037655	cce_2742	unknown	19.8951	19.8923	21.135	14.465	19.6375	19.91	14.465	14.465	2	0.246	18.8469	17.1194	-1.72748	0.301979	0.77
gi|172037663	cce_2750	pyruvate dehydrogenase E2 component	24.5295	24.455	24.8031	24.9172	24.9098	25.0169	25.0494	24.934	15	0.0217	24.6762	24.9775	0.301317	1.23227	0.0392
gi|172037681	cce_2768	probable nitroreductase	20.0169	20.2899	19.9754	20.3871	21.2424	21.4164	20.8644	20.5143	4	0.0072	20.1673	21.0094	0.842037	1.79258	0.00964
gi|172037692	cce_2779	zeta-carotene desaturase	14.465	14.465	14.465	14.465	19.1678	19.2287	19.7157	14.465	2	0.0129	14.465	18.1443	3.67932	12.8111	0.0199
gi|172037695	cce_2782	LysR family transcriptional regulator	21.0833	22.1273	21.164	21.2328	21.854	21.7551	21.7126	20.525	5	0.27	21.4019	21.4617	0.0598099	1.04233	0.885
gi|172037697	cce_2784	unknown	21.6494	24.2293	21.1395	21.9697	22.4091	22.0672	14.465	22.3689	2	0.242	22.247	20.3276	-1.91941	0.264362	0.751
gi|172037699	cce_2786	inositol monophophatase	19.8279	18.978	19.9374	20.2746	19.4081	18.8378	19.1446	19.3384	2	0.05	19.7545	19.1822	-0.572223	0.67258	0.109
gi|172037705	cce_2792	photosystem II 13 kD protein	20.7236	20.9922	21.1258	21.186	21.9231	21.7399	21.7225	22.0271	3	0.000758	21.0069	21.8531	0.846242	1.79781	0.000539
gi|172037717	cce_2804	amidase enhancer	20.4625	18.7211	19.1902	18.4279	20.8905	14.465	19.9551	19.022	3	0.0724	19.2004	18.5832	-0.61727	0.651903	0.168
gi|172037723	cce_2810	tRNA-i(6)A37 modification enzyme MiaB	22.8489	22.7033	23.0467	23.3182	21.6224	21.2106	21.2331	20.3326	6	0.00103	22.9793	21.0997	-1.87958	0.271762	0.000815
gi|172037725	cce_2812	ATP synthase epsilon subunit	25.8491	25.6615	25.7261	26.1204	25.8235	25.5729	25.8085	25.7573	10	0.159	25.8393	25.7406	-0.0987272	0.933857	0.43
gi|172037726	cce_2813	ATP synthase F1, beta subunit	29.1366	29.0522	29.1502	29.1668	29.3751	29.3466	29.3949	29.5973	47	0.00264	29.1265	29.4285	0.301998	1.23285	0.00292
gi|172037734	cce_2821	unknown	20.4236	20.3132	20.428	20.2211	19.3369	20.592	20.111	20.5544	2	0.186	20.3465	20.1486	-0.197934	0.871798	0.529
gi|172037737	cce_2824	UPF0075-containing protein	19.1967	17.1789	18.7573	18.6265	20.3079	19.9104	19.9783	14.465	2	0.0191	18.4399	18.6654	0.225543	1.16922	0.0335
gi|172037738	cce_2825	unknown	23.8152	22.8396	23.7842	23.334	24.3294	24.1484	24.7854	24.1342	3	0.011	23.4433	24.3493	0.906084	1.87395	0.0165
gi|172037789	cce_2876	unknown	20.493	20.463	20.2977	20.0521	18.8903	20.2057	19.6526	19.4921	6	0.0212	20.3264	19.5602	-0.766234	0.58795	0.0379
gi|172037792	cce_2879	soluble hydrogenase 42 kD subunit, small subunit of soluble hydrogenase	24.4516	24.626	24.7589	25.0385	25.183	25.1043	25.0589	25.1109	19	0.0131	24.7188	25.1143	0.395555	1.31545	0.0203
gi|172037799	cce_2886	unknown	21.7607	21.9283	22.1905	21.8619	21.8953	22.0184	22.0908	22.1843	4	0.135	21.9353	22.0472	0.111858	1.08062	0.349
gi|172037821	cce_2908	allophycocyanin alpha subunit	31.1875	31.0217	31.0871	31.2366	31.4081	31.5594	31.5799	32.0806	26	0.01	31.1332	31.657	0.523779	1.43772	0.0145
gi|172037822	cce_2909	allophycocyanin beta subunit	29.3065	29.2691	29.181	29.3426	29.797	29.6889	29.7843	29.9555	31	0.000363	29.2748	29.8064	0.531648	1.44558	0.000183
gi|172037824	cce_2911	phycobilisome LC linker polypeptide	26.9974	27.0189	26.8208	27.0352	28.0438	27.7437	27.7362	27.7928	9	0.000168	26.9681	27.8291	0.861066	1.81638	6.57e-05
gi|172037826	cce_2913	trigger factor	26.4318	26.3856	26.3008	26.4362	25.8502	25.952	25.8934	25.6429	31	0.000494	26.3886	25.8346	-0.553952	0.681152	0.000298
gi|172037836	cce_2923	CTP synthetase	20.9543	21.2129	21.3161	21.7338	21.1139	20.8991	20.9328	20.7564	3	0.0378	21.3043	20.9256	-0.378752	0.769103	0.0775
gi|172037838	cce_2925	heat shock protein Hsp90	23.6881	23.885	24.0996	23.8454	23.4718	23.77	23.714	22.8676	14	0.0492	23.8795	23.4559	-0.423669	0.745526	0.106
gi|172037839	cce_2926	unknown	23.2008	23.346	22.8221	22.6931	22.6185	22.5673	21.9955	21.8975	2	0.0139	23.0155	22.2697	-0.745825	0.596327	0.022
gi|172037843	cce_2930	unknown	18.6582	19.4851	18.8871	18.8035	14.465	14.465	21.4051	14.465	2	0.000368	18.9585	16.2	-2.75844	0.147784	0.000189
gi|172037849	cce_2936	dihydrodipicolinate reductase	21.9977	21.9631	21.3491	22.1726	14.465	20.8182	20.8233	21.163	4	0.186	21.8706	19.3174	-2.55326	0.17037	0.529
gi|172037850	cce_2937	unknown	22.6562	22.4988	21.1743	21.0679	22.6907	22.6562	23.0047	23.2619	2	0.029	21.8493	22.9034	1.0541	2.07643	0.0559
gi|172037855	cce_2942	unknown	25.1725	25.1228	25.0091	25.212	24.0415	24.2113	23.6973	24.2414	3	0.000363	25.1291	24.0479	-1.08124	0.472621	0.000181
gi|172037868	cce_2955	photosystem II extrinsic protein, cytochrome c550	25.8846	25.6131	25.9823	25.9818	27.5279	27.6314	27.4022	27.1604	7	8.61e-05	25.8655	27.4305	1.56501	2.95879	2.35e-05
gi|172037870	cce_2957	glutathione S-transferase	18.9774	19.2202	14.465	19.6581	21.8223	21.7166	21.3501	21.6032	4	0.0901	18.0802	21.623	3.54287	11.6549	0.215
gi|172037871	cce_2958	cytochrome b6-f complex Rieske iron-sulfur subunit, plastoquinol--plastocyanin reductase	26.5605	26.4852	26.4475	26.7101	27.1927	27.1229	27.2625	27.1848	10	0.000162	26.5508	27.1907	0.63988	1.5582	6.17e-05
gi|172037872	cce_2959	apocytochrome f component of cytochrome b6-f complex	26.4846	26.522	26.423	26.5428	26.7472	26.8146	26.8327	26.8137	10	0.000184	26.4931	26.8021	0.30896	1.23881	7.48e-05
gi|172037879	cce_2966	uroporphyrinogen decarboxylase	24.9653	25.0232	24.8929	24.969	25.9678	26.011	25.9047	25.522	13	0.000426	24.9626	25.8513	0.888759	1.85158	0.000247
gi|172037880	cce_2967	magnesium-protoporphyrin IX monomethyl ester aerobic oxidative cyclase	23.9548	23.8338	23.9183	23.7333	24.148	24.1903	24.1682	24.2835	10	0.00122	23.8601	24.1975	0.337477	1.26355	0.0011
gi|172037888	cce_2975	histidyl-tRNA synthetase	20.4381	20.8603	20.5687	20.7458	20.6096	20.0715	20.219	19.9856	3	0.0226	20.6532	20.2214	-0.431792	0.74134	0.0412
gi|172037903	cce_2990	unknown	25.1245	23.2313	14.465	25.3113	14.465	14.465	14.465	25.1394	2	0.172	22.033	17.1336	-4.89938	0.0335072	0.472
gi|172037905	cce_2992	glycyl-tRNA synthetase beta chain	22.6672	22.8019	22.3571	23.0343	22.6503	22.588	22.5561	22.5043	16	0.141	22.7151	22.5747	-0.140435	0.907246	0.369
gi|172037909	cce_2996	unknown	24.2943	24.1807	23.2815	23.4118	23.3477	22.7671	22.9297	23.1526	3	0.0231	23.7921	23.0493	-0.742767	0.597592	0.0423
gi|172037938	cce_3025	thiamine biosynthesis protein	22.9672	23.051	22.9546	23.2399	22.3768	22.2967	22.4122	22.5205	6	0.000368	23.0532	22.4015	-0.651647	0.636553	0.000191
gi|172037939	cce_3026	deoxyribose-phosphate aldolase	24.0006	23.7037	23.8145	23.5204	23.8018	23.3499	23.9736	23.6555	2	0.233	23.7598	23.6952	-0.0646111	0.956203	0.711
gi|172037941	cce_3028	FKBP-type peptidyl-prolyl cis-trans isomerase	24.9241	25.064	25.0776	24.9734	25.8286	25.6921	25.741	25.8337	5	3.42e-05	25.0098	25.7738	0.764031	1.69823	5.23e-06
gi|172037944	cce_3031	flavodoxin	21.4131	21.3169	21.7525	21.1159	14.465	14.465	14.465	14.465	3	6.84e-05	21.3996	14.465	-6.9346	0.0081748	1.66e-05
gi|172037946	cce_3033	hypothetical protein cce_3033	19.9183	18.8348	19.5297	20.0508	14.465	14.465	14.465	23.8245	3	9.76e-05	19.5834	16.8049	-2.77852	0.145741	2.83e-05
gi|172038002	cce_3089	unknown	19.6468	14.465	17.8958	21.6204	21.0142	21.3543	21.3087	22.2201	2	0.172	18.407	21.4743	3.06736	8.38238	0.471
gi|172038007	cce_3094	N-acetylornithine aminotransferase	25.1874	25.3049	25.1143	25.345	24.777	24.472	24.4879	24.4292	15	0.000542	25.2379	24.5415	-0.696385	0.617117	0.00034
gi|172038011	cce_3098	DUF938-containing protein	20.6019	20.8646	20.3554	19.4475	14.465	14.465	14.465	19.423	2	0.0478	20.3174	15.7045	-4.61286	0.0408686	0.103
gi|172038014	cce_3101	RNA-binding protein	25.9029	25.691	25.8907	26.1097	25.441	25.6154	25.9138	26.2144	4	0.205	25.8986	25.7961	-0.102443	0.931454	0.61
gi|172038016	cce_3103	30S ribosomal protein S21	24.2032	24.2605	24.1975	24.2306	23.5664	23.5798	23.4156	23.6228	2	4.15e-05	24.223	23.5462	-0.676806	0.625549	7.39e-06
gi|172038020	cce_3107	elongation factor EF-G fragment	14.465	14.465	14.465	14.465	20.8929	20.078	20.8797	20.8932	2	7.5e-05	14.465	20.6859	6.22094	74.5915	1.86e-05
gi|172038039	cce_3126	peroxiredoxin	27.3291	27.6252	27.7272	27.5695	25.2656	24.9425	25.1563	24.9048	18	1.06e-05	27.5627	25.0673	-2.49544	0.177337	8.32e-07
gi|172038047	cce_3134	tryptophan synthase beta subunit	23.6573	23.6666	23.8331	23.6385	23.3811	23.4783	23.4473	23.0504	9	0.0108	23.6989	23.3393	-0.359593	0.779385	0.016
gi|172038049	cce_3136	dienelactone hydrolase	22.8906	22.7306	22.8879	22.8628	22.6512	22.6047	22.7101	23.0002	6	0.131	22.843	22.7415	-0.101434	0.932106	0.334
gi|172038052	cce_3139	unknown	20.7431	20.9587	21.2924	21.4454	21.0076	20.7525	21.05	21.785	4	0.271	21.1099	21.1488	0.0388719	1.02731	0.891
gi|172038054	cce_3141	unknown	22.1273	22.0906	21.8163	21.7386	21.7516	21.6231	21.8877	21.4829	2	0.0453	21.9432	21.6863	-0.25688	0.836896	0.0962
gi|172038059	cce_3146	geranylgeranyl hydrogenase	25.4435	25.4285	25.5538	25.3301	26.9654	26.7678	26.8717	27.0238	17	1.13e-05	25.439	26.9072	1.4682	2.76676	9.31e-07
gi|172038062	cce_3149	unknown	22.3254	21.8809	21.8859	21.8472	22.9212	22.9722	22.9628	22.8516	5	0.000374	21.9848	22.927	0.942118	1.92135	0.000197
gi|172038063	cce_3150	50S ribosomal protein L20	22.1517	22.4658	22.1003	22.2035	22.4853	22.5295	22.2586	22.5479	9	0.0374	22.2303	22.4553	0.225031	1.1688	0.0764
gi|172038064	cce_3151	50S ribosomal protein L35	25.7454	25.3953	25.812	25.8545	25.1094	25.4586	25.7186	26.2532	7	0.254	25.7018	25.635	-0.066848	0.954722	0.808
gi|172038067	cce_3154	ferredoxin thioredoxin reductase, variable chain	23.7269	23.5608	23.2437	23.9214	23.7235	23.5981	23.6934	23.6078	4	0.248	23.6132	23.6557	0.0425334	1.02992	0.782
gi|172038077	cce_3164	ribulose bisphosphate carboxylase small subunit	28.3257	28.4507	28.3454	28.424	29.5538	29.602	29.6081	29.4449	15	6.55e-06	28.3864	29.5522	1.16575	2.2435	3.34e-07
gi|172038079	cce_3166	ribulose bisphosphate carboxylase large subunit	28.9137	28.6612	28.9179	28.8352	29.6711	29.7551	29.8379	30.0331	39	0.000151	28.832	29.8243	0.992295	1.98935	5.4e-05
gi|172038093	cce_3180	ferredoxin-sulfite reductase	24.7409	24.7021	24.6697	24.7503	24.4697	24.1198	24.1947	24.3386	24	0.00158	24.7157	24.2807	-0.435044	0.739671	0.00159
gi|172038098	cce_3185	unknown	22.2722	22.2111	22.2273	22.1725	22.1556	22.2729	22.3856	22.4524	5	0.0888	22.2208	22.3166	0.0958426	1.06869	0.211
gi|172038108	cce_3195	protease	22.2938	22.4685	22.1536	22.4305	21.4787	21.7984	21.6924	21.6897	11	0.000698	22.3366	21.6648	-0.671787	0.627728	0.000476
gi|172038114	cce_3201	coproporphyrinogen III oxidase, aerobic	23.3567	23.4086	23.4447	22.8507	24.4785	24.3611	24.0847	24.3826	8	0.000849	23.2652	24.3267	1.06154	2.08715	0.000625
gi|172038115	cce_3202	isocitrate dehydrogenase (NADP+)	25.6833	25.7747	25.8977	25.8947	24.9764	24.7254	24.8683	25.0747	13	0.000162	25.8126	24.9112	-0.901377	0.535376	6.14e-05
gi|172038120	cce_3207	unknown	23.2625	23.1694	23.1031	23.4262	23.6325	23.4769	23.4829	23.599	3	0.00666	23.2403	23.5478	0.307553	1.23761	0.00879
gi|172038121	cce_3208	phycobilisome rod-core linker polypeptide	28.7896	28.7998	29.0538	28.5055	29.8114	29.7791	29.9992	29.7753	28	0.000307	28.7872	29.8413	1.0541	2.07642	0.000145
gi|172038122	cce_3209	IMP dehydrogenase	25.2158	25.0725	25.0357	24.7849	25.4334	25.5024	25.2913	24.9356	17	0.0624	25.0272	25.2907	0.263462	1.20036	0.14
gi|172038134	cce_3221	ATP-dependent Clp protease, ATP-binding subunit	26.9956	26.8443	26.8872	27.0841	25.8866	26.1058	26.3055	26.615	6	0.00376	26.9528	26.2282	-0.724584	0.605171	0.00447
gi|172038137	cce_3224	acetylglutamate kinase	22.9823	22.9067	22.7816	23.2377	22.973	23.1661	22.8689	22.7318	5	0.245	22.9771	22.935	-0.042111	0.971233	0.762
gi|172038140	cce_3227	unknown	22.5361	22.5807	22.7162	22.862	22.4639	22.5916	22.4368	22.3568	8	0.0281	22.6737	22.4623	-0.211444	0.863673	0.0535
gi|172038141	cce_3228	heterodisulfide reductase, subunit B	23.0628	23.1793	23.1281	22.8716	22.0597	22.2161	21.9529	21.8706	3	0.000145	23.0604	22.0248	-1.03565	0.487795	4.87e-05
gi|172038143	cce_3230	unknown	22.1126	22.8836	22.492	21.9984	24.3705	24.3278	23.7767	22.604	2	0.0141	22.3717	23.7698	1.3981	2.63555	0.0224
gi|172038145	cce_3232	NAD dependent epimerase/dehydratase family protein	22.7762	22.9542	23.1519	22.3869	23.2454	22.6829	22.4175	22.73	6	0.261	22.8173	22.7689	-0.0483656	0.967031	0.845
gi|172038146	cce_3233	GDP-D-mannose 4,6-dehydratase	22.6848	22.5942	22.8077	22.4391	22.4506	22.5775	22.3328	22.1168	9	0.0392	22.6314	22.3694	-0.262019	0.83392	0.0808
gi|172038149	cce_3236	unknown	19.9618	19.0259	19.283	19.905	18.5767	17.6531	17.471	19.2256	4	0.0183	19.5439	18.2316	-1.31234	0.402666	0.0317
gi|172038155	cce_3242	unknown	28.5395	28.5505	28.6599	28.7985	28.0255	28.2278	28.1278	28.6388	7	0.0225	28.6371	28.255	-0.382099	0.76732	0.041
gi|172038157	cce_3244	succinate dehydrogenase iron-sulphur protein subunit	23.0344	23.062	23.0135	23.1419	21.6255	21.7164	21.4117	22.1191	3	0.00025	23.063	21.7182	-1.34478	0.393715	0.000111
gi|172038159	cce_3246	malic oxidoreductase	24.6955	24.5615	24.6828	24.7838	24.1897	24.0551	24.1009	24.0796	10	0.000129	24.6809	24.1063	-0.574596	0.671474	4.2e-05
gi|172038164	cce_3251	ornithine carbamoyltransferase	23.8809	23.9805	23.4449	23.8446	22.6792	23.179	22.841	22.19	4	0.00355	23.7877	22.7223	-1.06541	0.477836	0.00413
gi|172038165	cce_3252	putative dihydroorotate oxidase	21.3272	21.4294	21.9311	20.2322	21.8218	21.4854	21.9487	20.9488	3	0.173	21.23	21.5512	0.32122	1.24939	0.475
gi|172038179	cce_3266	GMP synthetase	24.3734	23.6581	24.151	23.7855	23.0004	23.2924	23.4676	23.3794	9	0.00773	23.992	23.285	-0.70703	0.61258	0.0106
gi|172038181	cce_3268	unknown	22.8832	22.6962	22.6756	22.8359	22.5436	22.1427	22.4152	22.308	8	0.00443	22.7727	22.3524	-0.420334	0.747251	0.00544
gi|172038188	cce_3275	acetyl-CoA carboxylase, biotin carboxylase subunit	22.2852	22.3594	22.4004	22.5889	22.5029	22.6913	22.4781	22.3187	6	0.153	22.4085	22.4978	0.0892591	1.06382	0.407
gi|172038193	cce_3280	aconitate hydratase 2	25.5898	25.6693	25.8188	25.7727	25.1158	25.2036	25.2232	24.9119	24	0.000709	25.7126	25.1136	-0.599	0.660211	0.000489
gi|172038201	cce_3288	unknown	23.8098	24.0789	24.2511	23.8347	23.8217	23.5902	23.4537	23.7087	6	0.021	23.9936	23.6436	-0.350068	0.784547	0.0374
gi|172038204	cce_3291	glucosylglycerolphosphate phosphatase	17.2052	17.9629	17.4828	17.2691	19.7074	19.6945	19.8207	19.9603	3	6.54e-05	17.48	19.7957	2.3157	4.97847	1.46e-05
gi|172038205	cce_3292	histidinol phosphate aminotransferase	23.107	23.3555	23.5211	23.1474	22.9607	22.7237	22.6802	22.6005	4	0.00389	23.2827	22.7413	-0.541449	0.68708	0.00466
gi|172038207	cce_3294	unknown	21.063	21.0502	20.7498	20.6187	21.2913	20.9103	21.2012	21.3144	4	0.0375	20.8704	21.1793	0.308884	1.23875	0.0766
gi|172038212	cce_3299	unknown	25.2659	25.135	25.325	24.4288	25.0695	25.0019	24.9223	24.3621	7	0.173	25.0386	24.8389	-0.199724	0.870717	0.476
gi|172038241	cce_3328	conserved hypothetical protein	20.5296	21.2967	21.4246	21.4864	22.3158	22.3093	22.3215	21.8306	5	0.00555	21.1843	22.1943	1.00995	2.01383	0.00716
gi|172038243	cce_3330	chaperonin 2	28.2622	28.2714	28.314	28.3554	27.8423	27.7225	27.8828	28.0672	76	0.00135	28.3008	27.8787	-0.422046	0.746366	0.00131
gi|172038249	cce_3336	RNA-binding protein	24.6963	24.9678	25.0198	25.1388	24.8245	24.9412	24.7654	25.1501	8	0.25	24.9557	24.9203	-0.035421	0.975747	0.789
gi|172038260	cce_3347	30S ribosomal protein S18	27.2659	27.2856	27.3605	27.7266	26.8138	26.9092	26.9295	27.1969	8	0.0109	27.4097	26.9624	-0.447295	0.733417	0.0163
gi|172038271	cce_3358	putative bacterioferritin comigratory protein	26.0086	26.0157	26.1233	26.2069	25.9922	26.218	25.9593	26.0751	12	0.236	26.0886	26.0612	-0.0274935	0.981123	0.725
gi|172038279	cce_3366	carboxysome formation protein	25.4654	25.441	25.4764	25.6165	25.24	25.0381	25.2353	25.1897	20	0.00183	25.4998	25.1758	-0.324051	0.798823	0.00191
gi|172038287	cce_3374	unknown	19.2439	14.465	19.4378	18.0314	14.465	14.465	18.1013	14.465	2	0.12	17.7945	15.3741	-2.42045	0.186798	0.303
gi|172038299	cce_3386	phycocyanin alpha phycocyanobilin lyase related protein	23.0905	22.9068	22.8587	22.8385	23.1623	23.3165	22.7891	22.8063	10	0.187	22.9236	23.0185	0.0949086	1.068	0.533
gi|172038305	cce_3392	30S ribosomal protein S16	26.902	26.8699	26.9822	27.036	26.5863	26.6889	26.7763	27.0494	8	0.0684	26.9475	26.7752	-0.17228	0.887439	0.156
gi|172038306	cce_3393	unknown	21.5011	22.9595	22.8557	23.2943	24.2806	24.1586	23.9815	24.6763	2	0.00648	22.6526	24.2742	1.62161	3.07718	0.00851
gi|172038308	cce_3395	NADH dehydrogenase subunit N	24.3123	24.2766	24.3197	24.4325	23.7671	23.7944	23.8014	24.0447	5	0.000782	24.3353	23.8519	-0.483371	0.715304	0.00057
gi|172038309	cce_3396	glycogen synthase	24.3108	24.2274	24.2692	24.1034	25.3168	25.1129	25	24.7675	16	0.000758	24.2277	25.0493	0.821602	1.76737	0.000545
gi|172038311	cce_3398	ferredoxin thioredoxin reductase catalytic chain	24.3658	24.412	24.4404	24.7115	24.3339	24.2976	24.4059	24.4997	4	0.125	24.4824	24.3843	-0.0981809	0.93421	0.316
gi|172038319	cce_3406	putative YfcH-like cell division inhibitor	21.7835	21.8041	21.6952	21.6608	21.5751	21.5461	21.5695	21.6841	6	0.0138	21.7359	21.5937	-0.142188	0.906144	0.0217
gi|172038331	cce_3418	probable extracellular solute-binding protein, family 1	18.3565	18.6086	18.4123	18.5487	19.3122	18.909	14.465	19.2267	2	0.065	18.4815	17.9782	-0.503295	0.705494	0.146
gi|172038332	cce_3419	unknown	21.1701	21.551	20.8082	23.1969	21.5406	21.3457	21.434	20.9574	2	0.186	21.6815	21.3194	-0.362124	0.778018	0.529
gi|172038333	cce_3420	pyruvate kinase	22.201	22.4118	21.8187	20.9032	22.9449	23.3881	23.1387	22.9232	13	0.00805	21.8337	23.0987	1.26508	2.40341	0.0113
gi|172038335	cce_3422	dTDP-glucose 4,6-dehydratase	22.6525	22.2786	21.8021	22.1086	23.3536	23.0176	23.0946	22.0381	3	0.0456	22.2105	22.876	0.66552	1.58614	0.0969
gi|172038336	cce_3423	UDP-glucose dehydrogenase	23.4268	23.457	23.2403	23.5871	24.1588	24.2375	24.2033	24.618	9	0.000698	23.4278	24.3044	0.876615	1.83606	0.00047
gi|172038343	cce_3430	unknown	21.7014	22.0072	22.3273	22.1122	21.883	21.2515	21.2791	21.3061	3	0.0142	22.037	21.4299	-0.607086	0.656522	0.0228
gi|172038350	cce_3437	ATPase	20.7597	20.6666	20.7014	20.2808	19.5109	19.7802	19.6529	19.2467	4	0.000758	20.6021	19.5477	-1.05443	0.481486	0.000546
gi|172038359	cce_3446	unknown	25.1775	24.9868	25.0324	24.9494	20.6713	21.6175	21.5741	21.9971	5	6.79e-05	25.0365	21.465	-3.57154	0.0841122	1.6e-05
gi|172038375	cce_3462	lysyl-tRNA synthetase	21.1806	21.3131	21.3671	21.383	21.0429	20.9778	21.0056	20.4654	8	0.0142	21.3109	20.8729	-0.438	0.738157	0.0228
gi|172038378	cce_3465	glycogen debranching enzyme	20.8928	21.2081	20.7891	20.7143	21.0435	19.8595	19.2831	19.0799	4	0.0284	20.9011	19.8165	-1.08458	0.471529	0.0542
gi|172038385	cce_3472	signal recognition particle protein	22.9815	22.9086	23.1393	22.9404	23.2054	22.7774	22.4785	23.0489	10	0.184	22.9925	22.8775	-0.11492	0.923434	0.519
gi|172038400	cce_3487	RNA polymerase beta prime subunit	25.0236	24.9818	25.0633	24.8452	24.8218	24.7394	24.8678	24.9097	42	0.028	24.9785	24.8347	-0.143811	0.905125	0.0531
gi|172038401	cce_3488	RNA polymerase beta subunit	26.1694	26.13	26.2354	26.1571	25.9378	25.8853	25.9588	26.0303	42	0.00121	26.173	25.9531	-0.219885	0.858634	0.00108
gi|172038403	cce_3490	30S ribosomal protein S20	25.4847	25.3392	25.4586	25.6695	23.9707	24.4415	24.286	25.1344	3	0.00536	25.488	24.4581	-1.02985	0.48976	0.00682
gi|172038414	cce_3501	photosystem II D1 protein	25.9172	26.349	26.3047	25.6089	27.3489	27.2173	26.9675	27.2572	4	0.00115	26.045	27.1977	1.15278	2.22342	0.000983
gi|172038417	cce_3504	3-isopropylmalate dehydratase large subunit	23.7471	23.805	23.8551	23.8945	22.5804	23.0306	23.1055	22.9776	5	0.000506	23.8254	22.9235	-0.901923	0.535173	0.000309
gi|172038418	cce_3505	unknown	20.2868	19.8077	20.9162	21.0905	14.465	19.5924	19.1854	19.2787	2	0.257	20.5253	18.1304	-2.39489	0.190137	0.824
gi|172038422	cce_3509	unknown	22.684	22.5536	22.614	23.0893	21.4837	21.6071	21.5397	22.0499	4	0.00115	22.7352	21.6701	-1.06512	0.477932	0.000948
gi|172038429	cce_3516	dethiobiotin synthase	14.465	18.9951	19.1128	14.465	19.7026	19.2203	18.678	19.2348	2	0.0719	16.7595	19.2089	2.44945	5.46209	0.166
gi|172038430	cce_3517	putative S-layer OprB family carbohydrate-selective porin	23.134	23.1758	23.415	23.1853	21.4908	21.9497	21.8246	22.3239	9	0.00055	23.2275	21.8972	-1.3303	0.397685	0.000349
gi|172038431	cce_3518	putative S-layer OprB family carbohydrate-selective porin	23.3417	22.5663	23.2862	23.4142	22.0194	21.9286	21.4638	21.5934	8	0.00121	23.1521	21.7513	-1.40078	0.378724	0.00105
gi|172038447	cce_3534	tryptophanyl-tRNA synthetase	21.7185	21.6643	21.7555	22.1461	22.7811	21.6378	22.6778	22.1427	8	0.0619	21.8211	22.3099	0.488792	1.40327	0.138
gi|172038466	cce_3553	asparaginase	23.7275	23.4806	23.4089	23.702	22.9527	23.1644	22.9872	23.4235	7	0.0105	23.5798	23.132	-0.447809	0.733156	0.0155
gi|172038484	cce_3571	allophycocyanin-B	25.9952	26.0337	26.0195	25.9593	26.2388	26.2835	26.3782	25.9704	10	0.0273	26.0019	26.2177	0.215816	1.16136	0.0513
gi|172038489	cce_3576	arginyl-tRNA-synthetase	20.5355	20.7587	20.9229	20.6439	14.465	14.465	20.011	19.2945	3	0.187	20.7152	17.0589	-3.65638	0.0793084	0.534
gi|172038492	cce_3579	cell division protein	25.6779	25.5949	25.6896	25.8973	25.6962	25.7553	25.7958	25.8871	20	0.152	25.7149	25.7836	0.0686673	1.04875	0.4
gi|172038504	cce_3591	uridylate kinase	18.3938	18.4367	18.4236	17.9262	18.3951	19.3852	18.5262	19.3518	3	0.0377	18.2951	18.9146	0.619496	1.53634	0.0773
gi|172038505	cce_3592	ribosome recycling factor	24.8829	24.798	24.8545	24.891	24.7355	24.5571	24.9421	24.7143	8	0.0828	24.8566	24.7373	-0.119324	0.920619	0.195
gi|172038519	cce_3606	putative Band 7 protein	25.8002	25.75	26.0114	25.7739	25.7535	25.5404	25.3449	25.4367	12	0.0153	25.8339	25.5189	-0.314997	0.803853	0.0252
gi|172038520	cce_3607	putative D-xylulose 5-phosphate/D-fructose 6-phosphate phosphoketolase	24.7245	24.6164	24.1558	24.487	24.977	24.7288	24.6796	25.1076	5	0.0291	24.4959	24.8732	0.3773	1.29891	0.0562
gi|172038525	cce_3612	glyceraldehyde-3-phosphate dehydrogenase	25.6625	25.606	25.6078	25.3253	25.5934	25.1564	25.5094	25.1357	17	0.0853	25.5504	25.3487	-0.201658	0.869551	0.202
gi|172038528	cce_3615	unknown	20.1207	21.9506	21.9502	19.9213	22.9249	22.8311	22.7413	20.1297	3	0.095	20.9857	22.1567	1.17105	2.25176	0.23
gi|172038530	cce_3617	3-isopropylmalate dehydrogenase	23.8703	23.7721	23.5597	23.4843	23.9086	23.7519	23.9545	23.5076	12	0.165	23.6716	23.7807	0.109077	1.07854	0.45
gi|172038533	cce_3620	dihydroorotase	22.6743	22.7486	22.3554	22.9653	23.5192	23.5838	23.3011	23.5646	7	0.00134	22.6859	23.4922	0.806268	1.74868	0.00129
gi|172038534	cce_3621	signal peptidase I	21.9168	22.1541	22.5078	22.161	22.7043	22.5206	22.8639	21.8514	2	0.113	22.1849	22.4851	0.300117	1.23124	0.281
gi|172038539	cce_3626	ATPase	24.5069	24.5076	24.5543	24.4626	23.8471	23.614	23.4287	23.2866	13	0.000401	24.5078	23.5441	-0.963741	0.512726	0.000225
gi|172038540	cce_3627	DUF1257-containing protein	21.8127	21.7612	21.6981	21.9259	20.8916	20.3808	21.0122	21.5903	3	0.0111	21.7995	20.9687	-0.830722	0.562248	0.0167
gi|172038544	cce_3631	unknown	23.83	23.9543	24.2046	24.1281	24.6607	24.0653	24.1436	23.2631	6	0.293	24.0292	24.0331	0.00391128	1.00271	0.99
gi|172038545	cce_3632	putative prenyltransferase	20.7253	20.5612	19.7072	20.5861	21.1765	20.7908	20.9983	20.1872	4	0.106	20.395	20.7882	0.393222	1.31332	0.261
gi|172038546	cce_3633	photosystem II 11 kD protein	25.2101	25.2733	25.585	25.4076	26.1575	26.2981	26.3029	26.1513	6	0.000216	25.369	26.2274	0.858443	1.81308	9.16e-05
gi|172038548	cce_3635	flavoprotein	21.7401	21.798	21.7569	22.006	22.6235	22.2977	21.9618	22.076	5	0.0218	21.8253	22.2397	0.414471	1.33281	0.0395
gi|172038551	cce_3638	tRNA (5-methylaminomethyl-2-thiouridylate)-methyltransferase	18.2921	18.0236	18.7751	18.779	18.9865	18.6622	14.465	14.465	2	0.0439	18.4674	16.6447	-1.82278	0.282676	0.0927
gi|172038564	cce_3651	peptide transport system permease protein	18.8263	14.465	18.5357	20.0277	18.3995	18.9831	14.465	19.0807	2	0.269	17.9637	17.7321	-0.231602	0.851689	0.878
gi|172038570	cce_3657	unknown	22.548	22.3207	22.3222	22.1995	22.5353	22.5865	22.5172	22.2033	5	0.138	22.3476	22.4606	0.112986	1.08146	0.358
gi|172038572	cce_3659	putative Glycosyl transferase, group 1	19.5881	19.9717	19.7316	19.5213	20.1775	19.1608	20.2285	19.1871	2	0.288	19.7032	19.6885	-0.0146994	0.989863	0.964
gi|172038576	cce_3663	UDP-N-acetylglucosamine 2-epimerase	21.5489	21.3121	21.6545	21.6744	21.467	22.178	21.4983	21.139	4	0.278	21.5475	21.5706	0.0231061	1.01614	0.924
gi|172038585	cce_3672	putative Tic22-like protein	25.1955	25.0953	25.2481	25.3381	26.037	25.9206	25.9012	26.1534	17	0.000151	25.2192	26.003	0.78378	1.72164	5.38e-05
gi|172038586	cce_3673	putative Tic22-like protein	19.0986	19.1883	19.3405	19.2819	20.9213	20.7192	21.0703	20.547	3	6.72e-05	19.2273	20.8144	1.58712	3.00448	1.55e-05
gi|172038591	cce_3678	unknown	23.9031	23.2822	23.5768	23.6855	23.3365	23.1144	23.0477	22.0905	5	0.0296	23.6119	22.8973	-0.714649	0.609353	0.0574
gi|172038594	cce_3681	molybdenum cofactor biosynthesis protein C	17.7894	17.7461	17.8634	17.8637	14.465	14.465	23.1829	19.8711	3	0.00152	17.8156	17.996	0.180375	1.13318	0.0015
gi|172038608	cce_3695	unknown	21.6642	21.7567	21.4832	22.0201	17.0268	18.2961	19.2357	19.4189	2	0.00125	21.731	18.4944	-3.23665	0.106089	0.00116
gi|172038617	cce_3704	unknown	22.467	22.484	22.4748	22.7895	22.9557	22.5821	22.5357	22.9667	2	0.0822	22.5538	22.76	0.206227	1.15367	0.193
gi|172038620	cce_3707	glycolate oxidase subunit	18.3133	14.465	19.4178	19.4499	19.7341	19.9271	19.6343	19.951	3	0.254	17.9115	19.8116	1.90014	3.73249	0.809
gi|172038637	cce_3724	putative FKBP-type peptidyl-prolyl cis-trans isomerase	21.6813	21.9142	21.5077	21.8552	21.1445	21.1632	21.6212	21.321	5	0.0151	21.7396	21.3125	-0.42712	0.743745	0.0247
gi|172038640	cce_3727	aminotransferase	21.68	21.0571	21.363	21.507	21.5761	21.5573	21.6248	21.9988	3	0.0618	21.4018	21.6892	0.287449	1.22048	0.138
gi|172038643	cce_3730	unknown	20.163	20.2957	19.8935	20.4778	21.7425	21.5459	21.3725	20.0884	4	0.0253	20.2075	21.1873	0.97982	1.97222	0.0472
gi|172038647	cce_3734	unknown	24.904	24.6805	24.4797	24.838	24.1464	24.1506	23.9971	23.9813	4	0.000993	24.7256	24.0688	-0.656727	0.634316	0.000777
gi|172038650	cce_3737	unknown	19.5464	20.2674	19.7773	19.4374	19.9278	14.465	14.465	19.4887	2	0.0665	19.7571	17.0866	-2.67049	0.157073	0.151
gi|172038655	cce_3742	unknown	26.9312	26.9558	26.8442	26.9852	27.3277	27.157	26.9523	27.3207	12	0.0183	26.9291	27.1894	0.260323	1.19775	0.0317
gi|172038656	cce_3743	unknown	23.265	23.4211	23.5155	23.2412	23.205	23.6087	22.9312	23.1347	6	0.152	23.3607	23.2199	-0.140828	0.906999	0.402
gi|172038659	cce_3746	6-phosphogluconate dehydrogenase	26.0533	25.9847	26.3621	26.1567	23.6655	23.5832	23.7724	23.7117	22	4.49e-06	26.1392	23.6832	-2.45599	0.182253	1.76e-07
gi|172038660	cce_3747	unknown	24.8879	24.8251	24.9179	24.803	24.8299	24.8485	25.1013	25.44	23	0.0929	24.8585	25.0549	0.196479	1.1459	0.224
gi|172038667	cce_3754	phytoene desaturase	24.4374	24.4151	24.4464	24.6106	24.1973	24.2395	24.1836	24.4233	6	0.0142	24.4774	24.2609	-0.216438	0.860688	0.0229
gi|172038675	cce_3762	unknown	21.8497	21.8095	21.7412	21.892	22.6641	23.0167	22.8022	22.5398	8	0.000277	21.8231	22.7557	0.93255	1.90865	0.000127
gi|172038681	cce_3768	oligopeptidase A	24.1259	24.1193	24.1859	24.1348	23.6274	23.6621	23.6104	23.5049	18	4.02e-05	24.1415	23.6012	-0.540297	0.687629	6.56e-06
gi|172038692	cce_3779	mRNA-binding protein	21.1592	21.1715	21.1005	21.175	21.4728	21.2737	21.6771	21.5295	8	0.0058	21.1515	21.4883	0.336747	1.26291	0.00754
gi|172038714	cce_3801	putative iron(III)-transport ATP-binding protein	21.4642	21.2157	21.3932	21.1985	14.465	19.3896	18.9565	14.465	4	0.266	21.3179	16.819	-4.49889	0.0442282	0.866
gi|172038725	cce_3812	unknown	25.4818	25.5093	25.6414	25.1218	25.1823	25.2394	25.0392	25.2386	4	0.0356	25.4386	25.1749	-0.263733	0.83293	0.0717
gi|172038726	cce_3813	unknown	24.6494	24.487	24.5346	25.1821	24.6395	24.6668	24.8408	24.8643	6	0.257	24.7133	24.7528	0.0395606	1.0278	0.824
gi|172038729	cce_3816	adenylosuccinate lyase	23.4511	23.4434	23.5019	23.5991	23.2811	22.534	22.7635	22.9881	6	0.00732	23.4989	22.8917	-0.60721	0.656465	0.00992
gi|172038735	cce_3822	phosphoenolpyruvate carboxylase	24.214	24.2089	24.0106	24.1092	23.4627	23.5369	23.5592	23.4328	20	9.93e-05	24.1357	23.4979	-0.637788	0.642698	2.96e-05
gi|172038751	cce_3838	RNA polymerase gamma-subunit	25.8173	25.7165	25.9438	25.8499	25.5601	25.3231	25.3559	25.6423	26	0.00559	25.8319	25.4703	-0.361522	0.778343	0.00724
gi|172038783	cce_3870	sulfatase	20.444	20.1095	20.5748	18.8228	22.2799	22.5385	21.08	21.3396	6	0.00997	19.9878	21.8095	1.82172	3.53503	0.0144
gi|172038788	cce_3875	unknown	24.6429	24.4807	24.4567	24.5177	24.2708	24.4028	24.4639	24.3107	11	0.0202	24.5245	24.3621	-0.162441	0.893512	0.0358
gi|172038840	cce_3927	unknown	26.0922	25.9452	26.1966	26.135	26.1449	26.2658	26.3258	26.6039	7	0.0355	26.0922	26.3351	0.242894	1.18336	0.0711
gi|172038841	cce_3928	cell division protein	21.9165	22.0431	21.5232	21.9379	21.3121	21.8569	21.6249	21.5713	6	0.0662	21.8552	21.5913	-0.263879	0.832846	0.15
gi|172038846	cce_3933	acetyl-CoA carboxylase alpha subunit	19.9849	19.956	19.6345	20.8187	19.5908	19.4695	19.8656	19.2702	7	0.0463	20.0985	19.549	-0.549516	0.683249	0.0991
gi|172038848	cce_3935	GTP cyclohydrolase I	21.3188	21.506	21.1441	21.7269	21.2457	21.5883	21.7814	21.8648	4	0.13	21.424	21.6201	0.196108	1.1456	0.332
gi|172038849	cce_3936	unknown	24.4954	24.3134	24.3318	24.3988	24.3568	24.6318	24.8554	25.2567	4	0.0437	24.3849	24.7752	0.390283	1.31065	0.0917
gi|172038852	cce_3939	unknown	23.28	22.0413	23.1188	23.4692	20.7341	21.5744	21.4812	21.318	6	0.0033	22.9773	21.2769	-1.7004	0.3077	0.00378
gi|172038860	cce_3947	threonyl-tRNA synthetase	24.0877	23.9482	24.1995	23.887	23.8027	23.5055	23.6276	23.3917	18	0.00559	24.0306	23.5819	-0.44875	0.732677	0.00723
gi|172038864	cce_3951	glycine/serine hydroxymethyltransferase	25.1618	25.1979	25.2437	25.06	24.7468	24.5275	24.7419	24.3855	14	0.00121	25.1658	24.6004	-0.565404	0.675766	0.00108
gi|172038876	cce_3963	photosystem I reaction center subunit XI	27.6479	27.8932	28.0197	27.9418	28.4828	28.5332	28.4632	28.4749	8	0.000486	27.8757	28.4885	0.612843	1.52927	0.000291
gi|172038877	cce_3964	photosystem I reaction centre subunit XI PsaL	23.356	23.3104	23.4706	23.3373	24.6923	24.3296	24.465	24.311	2	9.5e-05	23.3686	24.4495	1.08091	2.11537	2.72e-05
gi|172038880	cce_3967	unknown	22.9016	22.7594	22.6518	22.3773	23.2547	23.1519	23.1301	22.6496	2	0.0374	22.6725	23.0466	0.374069	1.296	0.0761
gi|172038885	cce_3972	adenylylsulfate kinase	21.773	21.8481	21.898	22.2885	23.4211	23.5632	23.3274	23.0668	5	0.000246	21.9519	23.3446	1.3927	2.62569	0.000108
gi|172038887	cce_3974	fructose-1,6-bisphosphatase II	26.9809	26.8244	26.8518	26.668	27.7609	27.6963	27.9662	28.1404	16	0.000258	26.8313	27.891	1.0597	2.0845	0.000116
gi|172038900	cce_3987	ATP-dependent DNA helicase	22.8209	22.8194	22.965	23.2244	24.0805	23.8129	24.5971	24.3787	5	0.00089	22.9574	24.2173	1.25986	2.39473	0.000672
gi|172038901	cce_3988	thioredoxin	27.1731	27.206	27.234	27.1343	27.3279	27.3911	27.6425	27.987	9	0.0212	27.1868	27.5871	0.400277	1.31976	0.0381
gi|172038903	cce_3990	glycyl-tRNA synthetase alpha chain	23.4516	23.5647	24.0577	23.3824	23.2645	23.2823	23.5113	23.2301	4	0.0578	23.6141	23.322	-0.292069	0.81673	0.128
gi|172038915	cce_4002	two-component response regulator	24.824	24.8676	25.0015	24.9913	25.3643	25.0118	25.2158	25.1789	13	0.0122	24.9211	25.1927	0.271595	1.20714	0.0187
gi|172038916	cce_4003	asparagine synthetase	19.4353	19.6443	18.3315	19.2128	14.465	14.465	14.465	14.465	2	5.22e-05	19.156	14.465	-4.69099	0.0387143	1e-05
gi|172038918	cce_4005	heat shock protein	24.8028	24.7665	24.8222	24.6928	24.5722	24.4666	24.5285	24.975	13	0.119	24.7711	24.6356	-0.135506	0.910351	0.297
gi|172038921	cce_4008	2-isopropylmalate synthase	20.5597	20.5671	20.9135	20.763	21.1631	21.3512	21.5554	21.147	7	0.00294	20.7008	21.3042	0.603374	1.51927	0.00329
gi|172038926	cce_4013	50S ribosomal protein L3	26.7928	26.7281	26.7652	27.0193	26.4051	26.5752	26.7093	27.1596	14	0.187	26.8263	26.7123	-0.114062	0.923983	0.537
gi|172038928	cce_4015	50S ribosomal protein L4	25.6578	25.6154	25.6795	25.7095	25.4569	25.1864	25.3252	25.8711	11	0.0904	25.6656	25.4599	-0.205642	0.867152	0.217
gi|172038929	cce_4016	50S ribosomal protein L23	25.9323	25.7769	25.9028	25.8675	26.0455	26.0899	25.9855	26.0533	12	0.004	25.8699	26.0436	0.173679	1.12793	0.00489
gi|172038930	cce_4017	50S ribosomal protein L2	26.6919	26.7032	26.8225	26.8047	26.5951	26.6106	26.8506	27.2452	19	0.222	26.7556	26.8254	0.0697766	1.04955	0.669
gi|172038931	cce_4018	30S ribosomal protein S19	26.7494	26.8335	27.0377	26.8676	26.9494	26.6141	27.0153	27.0592	8	0.245	26.8721	26.9095	0.0374184	1.02628	0.761
gi|172038932	cce_4019	50S ribosomal protein L22	24.9967	24.9879	25.3876	25.0203	24.4114	24.2873	24.3812	24.5864	3	0.00119	25.0981	24.4166	-0.681546	0.623497	0.00104
gi|172038933	cce_4020	30S ribosomal protein S3	26.9929	26.9841	27.0227	26.991	26.832	26.6156	26.6043	26.9369	19	0.0142	26.9977	26.7472	-0.250485	0.840614	0.023
gi|172038934	cce_4021	50S ribosomal protein L16	24.7644	24.8278	24.7773	24.7956	25.4871	25.3935	25.3032	25.0685	7	0.0013	24.7913	25.3131	0.521788	1.43573	0.00121
gi|172038935	cce_4022	50S ribosomal protein L29	25.3294	25.5057	25.7298	25.3032	25.363	25.1881	25.1409	24.9879	7	0.0287	25.467	25.17	-0.297022	0.813931	0.0553
gi|172038936	cce_4023	30S ribosomal protein S17	26.4691	26.1647	26.2592	26.5487	25.4983	25.7763	25.8368	26.3844	3	0.029	26.3604	25.8739	-0.486483	0.713763	0.056
gi|172038937	cce_4024	50S ribosomal protein L14	26.2698	26.2363	26.2186	26.2136	26.2204	26.1328	26.3089	26.2197	10	0.236	26.2346	26.2205	-0.0141119	0.990266	0.724
gi|172038938	cce_4025	50S ribosomal protein L24	26.5889	26.6233	26.6488	26.5824	26.5759	26.6118	26.6195	26.9177	5	0.156	26.6109	26.6812	0.0703685	1.04998	0.418
gi|172038940	cce_4027	50S ribosomal protein L5	26.7898	26.8023	26.8775	26.5924	27.1041	26.9738	26.8578	26.3037	13	0.256	26.7655	26.8099	0.0443462	1.03122	0.82
gi|172038941	cce_4028	30S ribosomal protein S8	26.5158	26.5511	26.5786	26.345	26.4097	26.2363	26.3553	26.4533	6	0.049	26.4976	26.3637	-0.133986	0.91131	0.106
gi|172038942	cce_4029	50S ribosomal protein L6	25.4143	25.2858	25.5814	25.5602	25.5947	25.3257	25.5889	25.8501	15	0.135	25.4604	25.5899	0.129453	1.09388	0.349
gi|172038943	cce_4030	50S ribosomal protein L18	25.6242	23.932	25.7001	25.8889	22.9549	25.9198	25.8796	24.9089	7	0.222	25.2863	24.9158	-0.370516	0.773506	0.671
gi|172038944	cce_4031	30S ribosomal protein S5	27.3854	27.2091	27.3771	27.418	27.1796	27.1719	27.2608	27.591	18	0.226	27.3474	27.3008	-0.0465709	0.968235	0.685
gi|172038945	cce_4032	50S ribosomal protein L15	25.4645	25.4807	25.5598	25.5217	25.8722	25.7823	25.8864	25.5891	9	0.00648	25.5067	25.7825	0.27583	1.21069	0.0085
gi|172038946	cce_4033	preprotein translocase SecY subunit	21.9894	22.0593	21.5412	21.6179	22.2478	21.0706	22.0845	22.7069	2	0.193	21.802	22.0274	0.225485	1.16917	0.563
gi|172038947	cce_4034	adenylate kinase	25.5056	25.463	25.5348	25.1277	25.6511	25.7276	25.4358	25.4632	11	0.0918	25.4077	25.5694	0.161674	1.11858	0.221
gi|172038948	cce_4035	translation initiation factor IF-1	23.4328	23.9998	23.5789	23.9787	24.1301	24.2689	24.0595	23.9124	4	0.0372	23.7475	24.0927	0.345193	1.27032	0.0756
gi|172038950	cce_4037	30S ribosomal protein S13	27.3918	27.4119	27.4872	27.2857	27.3334	27.1276	27.2031	27.2939	11	0.0253	27.3941	27.2395	-0.154629	0.898364	0.0473
gi|172038951	cce_4038	30S ribosomal protein S11	26.3347	26.2914	26.476	26.3784	26.2641	26.2496	26.4672	26.7383	9	0.213	26.3701	26.4298	0.0596489	1.04221	0.639
gi|172038952	cce_4039	RNA polymerase alpha subunit	25.9539	25.8904	25.7974	25.8643	25.7388	25.7145	25.6318	25.7003	18	0.00341	25.8765	25.6964	-0.180121	0.882629	0.00394
gi|172038953	cce_4040	50S ribosomal protein L17	26.0383	26.0708	26.1363	26.0696	26.2339	26.2589	26.1792	26.1461	6	0.00661	26.0787	26.2045	0.125761	1.09108	0.00869
gi|172038955	cce_4042	50S ribosomal protein L13	25.9477	25.9394	25.8692	26.2337	25.6027	25.5306	25.649	25.9392	8	0.0217	25.9975	25.6804	-0.317111	0.802675	0.0391
gi|172038956	cce_4043	30S ribosomal protein S9	26.7062	26.6378	26.8307	26.8525	26.6856	26.7716	26.6838	27.0513	9	0.229	26.7568	26.7981	0.0413066	1.02905	0.696
gi|172038957	cce_4044	50S ribosomal protein L31	25.2236	25.2064	25.2548	25.1976	24.8372	24.8506	24.9349	25.5716	2	0.141	25.2206	25.0486	-0.172048	0.887582	0.366
gi|172038958	cce_4045	peptide chain release factor 1	23.0425	22.5063	22.68	22.6429	22.0886	22.4245	22.1996	22.346	8	0.0108	22.7179	22.2647	-0.453242	0.7304	0.0161
gi|172038962	cce_4049	acyl-CoA dehydrogenase	19.1723	18.9862	18.9503	20.0823	17.7517	17.3634	14.465	14.465	2	0.191	19.2978	16.0113	-3.2865	0.102486	0.555
gi|172038976	cce_4063	unknown	23.0643	22.2618	22.5606	22.7602	21.6462	21.7889	21.5548	21.8321	2	0.00178	22.6617	21.7055	-0.956234	0.515401	0.00184
gi|172038986	cce_4073	aminomethyl transferase, glycine cleavage T protein	19.3492	19.1658	19.1153	18.7392	19.2639	19.3363	19.3541	18.7643	4	0.22	19.0924	19.1797	0.0872907	1.06237	0.661
gi|172039000	cce_4087	30S ribosomal protein S10	27.0729	27.2034	27.0805	27.1471	27.2638	26.941	27.1275	27.1706	10	0.294	27.126	27.1257	-0.000257438	0.999822	0.997
gi|172039001	cce_4088	elongation factor EF-Tu	29.2936	29.3723	29.3445	29.3353	29.4614	29.4148	29.458	29.4438	60	0.00146	29.3364	29.4445	0.108092	1.0778	0.00143
gi|172039002	cce_4089	elongation factor EF-G	23.8424	23.8242	23.7182	23.8436	23.33	23.4744	23.5097	23.3167	17	0.000679	23.8071	23.4077	-0.3994	0.758174	0.00045
gi|172039003	cce_4090	30S ribosomal protein S7	26.1896	26.3006	26.2891	26.289	26.3999	26.3742	26.2792	26.3882	7	0.026	26.2671	26.3604	0.0932809	1.06679	0.0488
gi|172039004	cce_4091	30S ribosomal protein S12	26.6243	26.5133	26.7067	27.016	25.6204	26.0591	26.3808	26.198	7	0.0105	26.7151	26.0646	-0.650495	0.637062	0.0156
gi|172039007	cce_4094	unknown	19.5941	20.3861	20.3108	19.5469	21.2824	19.8614	20.1554	19.9514	5	0.154	19.9595	20.3127	0.353171	1.27737	0.41
gi|172039008	cce_4095	unknown	22.4624	22.4238	22.4965	22.4269	21.3071	21.2147	21.2562	21.2871	5	5.22e-07	22.4524	21.2663	-1.1861	0.439488	8.18e-09
gi|172039013	cce_4100	unknown	20.4401	20.3164	20.5692	20.5307	21.249	21.4942	20.9921	20.5257	4	0.018	20.4641	21.0652	0.601147	1.51692	0.0311
gi|172039029	cce_4116	hypothetical protein cce_4116	22.738	22.5703	22.6739	22.7459	23.6991	23.8777	23.8119	23.693	7	1.68e-05	22.682	23.7704	1.08842	2.12641	1.91e-06
gi|172039030	cce_4117	acyl carrier protein	26.3357	26.1694	25.8115	25.3792	26.1261	25.7411	25.9763	25.4374	2	0.231	25.9239	25.8202	-0.103724	0.930628	0.704
gi|172039031	cce_4118	3-oxoacyl-[acyl-carrier-protein] synthase I/II	24.2453	24.1227	24.2185	24.2714	23.9018	24.1093	24.1906	24.4461	11	0.222	24.2145	24.162	-0.052517	0.964253	0.67
gi|172039034	cce_4121	unknown	21.9417	21.8579	22.1751	22.2012	22.1616	22.3674	22.3549	22.4657	10	0.0188	22.044	22.3374	0.293421	1.22554	0.0328
gi|172039036	cce_4123	30S ribosomal protein S15	25.5268	25.5589	25.6722	25.5864	25.1868	25.3474	25.6269	25.9844	10	0.25	25.5861	25.5364	-0.0497144	0.966128	0.789
gi|172039042	cce_4129	putative S-layer OprB family carbohydrate-selective porin	25.9188	26.0371	25.9515	26.0321	25.7978	25.7487	25.6227	25.7462	23	0.00166	25.9849	25.7288	-0.256056	0.837374	0.00169
gi|172039053	cce_4140	phosphoribosylformimino-5-aminoimidazole carboxamide ribotide isomerase	20.1499	20.4125	20.3648	20.4945	20.8832	20.8083	21.2737	21.0644	3	0.00203	20.3554	21.0074	0.651989	1.57133	0.00217
gi|172039059	cce_4146	diaminopimelate epimerase	22.0252	22.4463	22.3001	22.1894	23.2357	23.1238	22.9272	22.9607	4	0.000576	22.2402	23.0619	0.82165	1.76743	0.00037
gi|172039060	cce_4147	penicillin-binding protein 1B	21.3656	21.8314	21.7747	21.4448	23.0839	22.9773	22.8339	22.7679	2	0.00018	21.6041	22.9157	1.31163	2.48222	7.28e-05
gi|172039065	cce_4152	aspartyl-tRNA synthetase	23.2598	23.5588	23.3944	23.6162	24.1276	23.9233	23.8332	23.6239	13	0.0125	23.4573	23.877	0.419699	1.33765	0.0192
gi|172039074	cce_4161	unknown	22.5325	22.9027	23.0174	22.4344	23.6708	23.7556	22.7896	23.1622	3	0.0301	22.7217	23.3445	0.622793	1.53985	0.0584
gi|172039079	cce_4166	unknown	23.9345	24.0264	24.3653	24.0856	24.2444	24.2552	24.4385	24.2499	5	0.0512	24.103	24.297	0.194025	1.14395	0.112
gi|172039096	cce_4183	two-component response regulator	21.4181	21.9124	21.2841	22.0638	22.4809	22.8476	22.4143	22.2092	2	0.00854	21.6696	22.488	0.818382	1.76343	0.0121
gi|172039101	cce_4188	unknown	20.4722	20.2942	20.8712	20.54	20.5423	20.5607	20.5114	21.0328	2	0.185	20.5444	20.6618	0.117423	1.0848	0.523
gi|172039113	cce_4200	chorismate synthase	20.5126	20.7234	20.6452	20.9509	20.8995	20.5166	20.7334	21.0765	4	0.187	20.708	20.8065	0.098448	1.07062	0.538
gi|172039115	cce_4202	putative Hybrid cluster protein	19.1742	19.5014	19.7309	18.9376	20.1423	20.5809	20.5224	20.3006	5	0.00192	19.336	20.3865	1.0505	2.07124	0.00203
gi|172039132	cce_4219	phosphoglycerate kinase	25.1983	25.2895	25.2323	25.1655	26.1283	26.0608	25.9557	26.0811	18	1.49e-05	25.2214	26.0565	0.835086	1.78396	1.59e-06
gi|172039134	cce_4221	adenylosuccinate synthetase	24.147	24.2037	24.2035	23.9928	23.87	23.7327	23.6017	23.525	11	0.00223	24.1367	23.6824	-0.454373	0.729827	0.00243
gi|172039135	cce_4222	50S ribosomal protein L25	21.9954	22.3145	22.6918	22.1598	22.5484	22.9187	23.107	22.8804	7	0.0142	22.2904	22.8636	0.573265	1.48789	0.0229
gi|172039140	cce_4227	acetolactate synthase large subunit	24.0967	24.2139	24.2236	24.0562	24.9187	24.6052	24.5584	24.7659	12	0.00107	24.1476	24.7121	0.564456	1.47883	0.000862
gi|172039141	cce_4228	succinate-semialdehyde dehydrogenase (NADP+)	23.909	23.9128	23.955	23.9478	24.506	24.5018	24.4971	24.8314	12	0.000404	23.9312	24.5841	0.652887	1.57231	0.000228
gi|172039147	cce_4234	short-chain dehydrogenase/reductase SDR	20.0926	20.5534	20.6698	20.1738	21.021	21.293	21.0168	20.2876	2	0.0407	20.3724	20.9046	0.532221	1.44615	0.0844
gi|172039150	cce_4237	leucyl-tRNA synthetase	22.6595	22.7765	22.9468	22.9499	22.2217	22.1703	22.2907	22.3862	11	0.000758	22.8332	22.2672	-0.565952	0.67551	0.000544
gi|172039160	cce_4247	ATP-dependent Clp protease, regulatory subunit	27.0323	26.9699	26.9926	27.0673	26.2559	26.1012	26.2215	26.4909	50	0.000256	27.0156	26.2674	-0.748182	0.595353	0.000114
gi|172039162	cce_4249	ATP phosphoribosyltransferase	21.2648	20.8317	20.4319	20.0674	21.4858	21.4043	20.9109	20.8965	2	0.0596	20.649	21.1744	0.525416	1.43935	0.133
gi|172039164	cce_4251	competence-damage protein	19.8635	14.465	19.7946	19.1641	19.4597	20.2025	20.0208	19.3322	2	0.167	18.3218	19.7538	1.43202	2.69824	0.455
gi|172039167	cce_4254	fructose-bisphosphate aldolase class I	21.1246	21.3411	21.7508	22.7089	21.1867	21.9262	21.1549	21.4691	2	0.173	21.7313	21.4342	-0.297095	0.81389	0.479
gi|172039168	cce_4255	protease	23.3628	23.5096	23.3924	23.4251	21.2193	21.9609	21.5134	21.8865	12	0.000151	23.4225	21.645	-1.77744	0.2917	5.35e-05
gi|172039171	cce_4258	valyl-tRNA synthetase	23.3194	23.5099	23.4368	23.3744	22.9674	23.1032	23.0144	23.0608	8	0.000506	23.4101	23.0365	-0.373682	0.77181	0.000309
gi|172039185	cce_4272	unknown	25.0126	25.209	25.0918	25.1459	25.9027	25.6095	25.8167	25.6661	19	0.000382	25.1148	25.7488	0.633939	1.5518	0.000203
gi|172039193	cce_4280	carbon dioxide concentrating mechanism protein	26.758	26.6846	26.7649	26.7952	27.5235	27.4998	27.706	27.7891	39	8.44e-05	26.7507	27.6296	0.878923	1.839	2.18e-05
gi|172039194	cce_4281	carbon dioxide concentrating mechanism protein	19.4498	18.9611	20.2613	19.6458	21.6342	21.4658	21.0517	21.1916	3	0.00121	19.5795	21.3358	1.75635	3.37843	0.00109
gi|172039195	cce_4282	carbon dioxide concentrating mechanism protein	26.8864	26.7587	26.7589	26.8032	27.8878	27.6894	27.7489	27.6746	7	2.36e-05	26.8018	27.7502	0.948372	1.92969	3.06e-06
gi|172039196	cce_4283	carbon dioxide concentrating mechanism protein	26.8924	26.7849	27.1549	26.8665	27.7723	27.8062	27.7702	27.4477	7	0.000762	26.9246	27.6991	0.774457	1.71055	0.000552
gi|172039217	cce_4304	triosephosphate isomerase	24.5013	24.6392	24.9887	24.662	24.7006	24.7825	24.6232	25.031	7	0.189	24.6978	24.7843	0.0864997	1.06179	0.548
gi|172039227	cce_4314	arginine biosynthesis bifunctional protein	24.55	24.541	24.3948	24.5329	23.8255	23.9743	23.9506	24.0119	7	0.000145	24.5047	23.9406	-0.564076	0.676388	4.83e-05
gi|172039238	cce_4325	photosystem I reaction center subunit IV	27.9289	28.0948	28.3118	27.8465	29.4632	29.2316	29.2239	29.2515	11	0.000129	28.0455	29.2925	1.24703	2.37352	4.13e-05
gi|172039242	cce_4329	inorganic pyrophosphatase	24.7252	24.962	25.0109	24.6806	26.0537	25.8542	25.7248	25.6201	11	0.000423	24.8447	25.8132	0.968511	1.95682	0.000242
gi|172039243	cce_4330	NADH dehydrogenase subunit O	23.6621	23.7939	23.8447	23.7446	23.3892	23.0298	23.138	22.9275	6	0.00115	23.7613	23.1211	-0.640184	0.641631	0.000955
gi|172039250	cce_4337	unknown	22.5016	21.8029	22.0357	22.373	21.6096	22.0286	21.9987	22.0752	8	0.0983	22.1783	21.928	-0.250262	0.840743	0.24
gi|172039259	cce_4346	glycine cleavage system protein T	23.4807	23.5342	23.6232	23.5708	22.7254	22.582	22.5723	22.3674	4	6.84e-05	23.5523	22.5618	-0.990479	0.503311	1.64e-05
gi|172039266	cce_4353	ferredoxin-dependent glutamate synthase	25.319	25.3263	25.1546	25.3157	24.807	24.6629	24.6656	24.7665	29	0.000156	25.2789	24.7255	-0.553393	0.681416	5.68e-05
gi|172039267	cce_4354	bifunctional purine biosynthesis protein, phosphoribosylaminoimidazolecarboxamide formyltransferase/IMP cyclohydrolase	23.8381	24.003	24.2826	24.0307	23.439	23.1174	23.4084	22.5694	13	0.00513	24.0386	23.1335	-0.905055	0.534012	0.00645
gi|172039271	cce_4358	magnesium chelatase, subunit H	19.719	19.8242	20.4292	20.0627	21.1117	21.2272	20.8858	21.0308	8	0.00109	20.0088	21.0639	1.05511	2.07787	0.000887
gi|172039283	cce_4370	argininosuccinate synthetase	25.7619	25.6881	25.6628	25.8229	24.6184	24.4406	24.4906	24.6955	19	2.07e-05	25.7339	24.5613	-1.17261	0.443618	2.59e-06
gi|172039291	cce_4378	porphobilinogen deaminase	24.9439	25.0502	24.7615	24.9874	25.1307	24.9239	24.7486	24.6664	14	0.2	24.9357	24.8674	-0.0683372	0.953737	0.59
gi|172039292	cce_4379	CHP103-containing protein	27.0679	26.9423	26.9072	26.8393	27.1332	27.1413	27.1324	27.3596	7	0.00982	26.9392	27.1916	0.252473	1.19125	0.0141
gi|172039308	cce_4395	putative rieske 2Fe-2S family protein	21.5922	21.8402	21.4537	21.1673	21.0882	20.5754	20.7363	21.0569	3	0.0095	21.5134	20.8642	-0.649147	0.637657	0.0135
gi|172039310	cce_4397	rfrA family pentapeptide repeat	19.5151	19.9713	14.465	14.465	14.465	14.465	20.3353	19.3854	2	0.293	17.1041	17.1627	0.058598	1.04145	0.99
gi|172039311	cce_4398	50S ribosomal protein L9	26.5889	26.6043	26.7519	26.5805	26.7616	26.3761	26.6035	26.701	14	0.258	26.6314	26.6106	-0.0208171	0.985674	0.832
gi|172039312	cce_4399	probable oxidoreductase	22.7392	22.405	22.5004	22.3201	22.1182	22.1897	22.5495	21.6656	4	0.0571	22.4912	22.1307	-0.360441	0.778926	0.126
gi|172039313	cce_4400	dihydroxyacid dehydratase	25.9686	25.9391	26.0009	25.9774	25.784	25.6147	25.8564	26.0519	13	0.0716	25.9715	25.8268	-0.144714	0.904559	0.165
gi|172039314	cce_4401	DNA gyrase A subunit	24.6074	24.6841	24.7843	24.5396	24.7302	24.6901	24.6992	24.5893	17	0.234	24.6538	24.6772	0.02338	1.01634	0.714
gi|172039325	cce_4412	magnesium-protoporphyrin IX monomethyl ester aerobic oxidative cyclase	24.9779	24.7858	24.7821	24.9002	23.9815	24.2483	24.412	24.7577	6	0.0143	24.8615	24.3499	-0.511605	0.701442	0.0233
gi|172039345	cce_4432	glutamine synthetase, glutamate--ammonia ligase	29.8098	29.8112	29.7807	29.913	28.6607	28.4575	28.4585	28.6719	30	1.37e-05	29.8287	28.5622	-1.26654	0.415654	1.39e-06
gi|172039349	cce_4436	ATP-dependent RNA helicase	20.4482	20.485	21.0819	19.9981	20.3756	20.8569	19.7077	20.289	5	0.194	20.5033	20.3073	-0.195997	0.872969	0.567
gi|172039350	cce_4437	CHP1125-containing protein	17.0889	16.9919	18.31	18.5127	14.465	14.465	14.4652	16.4355	2	0.185	17.7259	14.9577	-2.76821	0.146786	0.521
gi|172039351	cce_4438	ATP-dependent Clp protease, ATPase subunit	23.4457	23.0991	23.2548	23.3197	23.1593	23.1379	23.0597	23.5649	9	0.236	23.2798	23.2305	-0.0493581	0.966366	0.726
gi|172039352	cce_4439	ATP-dependent Clp protease, proteolytic subunit	25.6365	25.77	25.8431	25.8646	25.3585	25.1301	25.2928	24.8841	2	0.00189	25.7785	25.1663	-0.612171	0.654212	0.002
gi|172039353	cce_4440	3-dehydroquinate synthase	21.2093	21.3402	20.8132	19.8506	22.0042	21.6967	21.4285	21.3526	4	0.0342	20.8033	21.6205	0.81718	1.76196	0.068
gi|172039373	cce_4460	prolyl-tRNA synthetase	22.1804	21.7806	22.4101	22.2779	23.1358	21.8124	21.7505	22.2415	7	0.261	22.1623	22.235	0.0727637	1.05173	0.841
gi|172039391	cce_4478	acetolactate synthase	22.9663	23.1002	23.2366	22.975	23.5421	23.0809	23.1365	22.7079	10	0.253	23.0695	23.1168	0.0473161	1.03334	0.804
gi|172039397	cce_4484	ATP synthase F0, C subunit	24.8037	24.8317	25.0172	24.9809	24.4851	24.3937	24.4855	24.6144	8	0.00119	24.9084	24.4947	-0.413726	0.750682	0.00104
gi|172039398	cce_4485	ATP synthase F0, B' subunit	26.8442	26.6521	26.6006	26.7782	26.2241	26.1704	26.379	26.4442	14	0.00256	26.7188	26.3044	-0.414334	0.750366	0.00282
gi|172039399	cce_4486	ATP synthase F0, B subunit	26.4727	26.285	26.5985	26.4497	26.2884	26.1974	26.3778	26.8774	15	0.278	26.4515	26.4352	-0.0162428	0.988805	0.925
gi|172039400	cce_4487	ATP synthase delta subunit	25.7813	25.7222	25.7026	25.8047	25.7846	25.5384	25.6557	25.7143	11	0.0902	25.7527	25.6733	-0.0794131	0.946443	0.216
gi|172039401	cce_4488	ATP synthase F1, alpha subunit	28.8089	28.6719	28.7851	28.8155	29.1363	29.0624	29.0756	29.2801	53	0.00107	28.7703	29.1386	0.368256	1.29079	0.000859
gi|172039402	cce_4489	ATP synthase gamma subunit	27.4664	27.4478	27.4412	27.3475	27.4319	27.4744	27.5357	27.6885	14	0.0611	27.4257	27.5326	0.106922	1.07693	0.136
gi|172039403	cce_4490	unknown	14.465	14.465	14.465	14.465	23.9516	24.0203	23.8146	23.1224	3	0.0199	14.465	23.7272	9.26221	614.049	0.0351
gi|172039412	cce_4499	unknown	23.4905	23.4273	23.4882	23.2325	22.7611	22.9482	22.826	22.3017	4	0.00337	23.4096	22.7093	-0.700353	0.615421	0.00388
gi|172039425	cce_4512	aspartate kinase	20.8422	21.0126	20.7811	21.3188	20.4306	14.465	19.9284	19.2067	2	0.235	20.9886	18.5077	-2.48096	0.179125	0.72
gi|172039437	cce_4524	ribonuclease PH	17.1845	17.0868	17.0793	19.2393	18.8809	19.3662	19.1731	20.1749	2	0.0158	17.6475	19.3988	1.7513	3.36662	0.0265
gi|172039445	cce_4532	light-independent protochlorophyllide reductase iron protein subunit	21.6537	21.6248	21.4602	21.8716	21.2391	21.4424	21.5358	22.2171	3	0.263	21.6526	21.6086	-0.0439516	0.969994	0.854
gi|172039447	cce_4534	light-independent protochlorophyllide reductase, N subunit	22.4103	22.5179	22.4942	22.251	24.047	24.1853	24.2995	23.9033	4	2.65e-05	22.4184	24.1088	1.69044	3.22754	3.63e-06
gi|172039454	cce_4541	DNA gyrase A subunit	22.7705	22.5085	21.1932	22.8396	22.3663	22.4942	22.1001	22.4846	4	0.281	22.3279	22.3613	0.0333385	1.02338	0.936
gi|172039458	cce_4545	isoleucyl-tRNA synthetase	23.4351	23.5586	23.7568	23.4696	23.6207	23.3467	23.2264	23.2419	15	0.0636	23.555	23.3589	-0.196117	0.872897	0.143
gi|172039465	cce_4552	unknown	20.1959	19.4422	19.6213	20.5867	20.2127	19.8698	20.0514	19.9844	2	0.254	19.9615	20.0296	0.0680863	1.04833	0.811
gi|172039468	cce_4555	putative polysaccharide pyruvyl transferase	23.5669	23.5987	23.5692	23.4401	23.9182	23.651	23.8449	23.6196	12	0.0212	23.5437	23.7584	0.214693	1.16046	0.038
gi|172039484	cce_4571	sulfolipid biosynthesis protein	25.5679	25.674	25.8376	25.729	26.509	26.4446	26.5635	26.5377	16	5.81e-05	25.7021	26.5137	0.811561	1.75511	1.2e-05
gi|172039489	cce_4576	photosystem I assembly protein	20.5001	20.1695	19.9484	20.2548	19.65	19.7954	19.2972	14.465	2	0.254	20.2182	18.3019	-1.91631	0.264932	0.81
gi|172039495	cce_4582	3-isopropylmalate dehydratase, small subunit	23.4685	23.467	23.5634	23.046	22.7632	22.6891	23.1497	22.2344	3	0.0139	23.3862	22.7091	-0.677129	0.625408	0.0219
gi|172039499	cce_4586	DegT/DnrJ/EryC1/StrS aminotransferase family protein	21.8872	20.7602	20.5414	14.465	21.5062	21.7184	21.7004	21.2318	3	0.278	19.4135	21.5392	2.12576	4.36432	0.923
gi|172039503	cce_4590	DUF370-containing protein	27.3298	27.3645	27.4041	27.4046	26.6216	26.461	26.5112	26.7697	5	0.000102	27.3758	26.5909	-0.784879	0.580401	3.18e-05
gi|172039508	cce_4595	1,4-alpha-glucan branching enzyme	23.7004	23.2125	23.0457	24.1311	23.781	23.7589	23.6189	23.953	5	0.137	23.5224	23.7779	0.25551	1.19376	0.355
gi|172039509	cce_4596	tRNA modification GTPase	19.0595	19.0895	18.8122	18.8933	18.5161	18.8698	19.2222	18.6133	2	0.149	18.9636	18.8053	-0.158239	0.896118	0.391
gi|172039529	cce_4616	methionine aminopeptidase	23.3403	23.0578	23.153	23.2197	22.5351	22.1106	22.3461	22.9613	4	0.00732	23.1927	22.4883	-0.704436	0.613682	0.00989
gi|172039530	cce_4617	unknown	21.0665	21.4541	20.8707	21.1593	14.465	14.465	19.5297	14.465	2	0.114	21.1376	15.7312	-5.40645	0.0235775	0.284
gi|172039539	cce_4626	glutathione reductase	25.8449	25.8044	25.618	25.858	24.9272	24.9334	25.0861	25.2177	23	0.000336	25.7813	25.0411	-0.740213	0.598651	0.000163
gi|172039540	cce_4627	transketolase	27.9701	27.9159	27.9177	28.0382	27.7645	27.6942	27.764	27.9065	38	0.0105	27.9605	27.7823	-0.178163	0.883828	0.0153
gi|172039549	cce_4636	rfrA family pentapeptide repeat	22.0781	22.2626	22.0049	20.6358	21.6928	21.7299	20.9542	20.8731	5	0.139	21.7453	21.3125	-0.432823	0.740811	0.363
gi|172039552	cce_4639	recombination protein	23.4232	23.4287	23.7185	23.585	24.1315	24.0923	24.2286	23.8513	5	0.00219	23.5388	24.0759	0.53712	1.45107	0.00239
gi|172039560	cce_4647	pyruvate dehydrogenase E1 component beta subunit	24.7014	24.5557	24.7275	24.6742	24.489	24.611	24.8161	24.5169	15	0.185	24.6647	24.6082	-0.0564479	0.961629	0.523
gi|172039571	cce_4658	sulfate adenylyltransferase	23.398	23.1956	23.4583	23.288	24.0146	24.0494	23.7277	23.7573	12	0.00164	23.335	23.8873	0.552304	1.46643	0.00167
gi|172039575	cce_4662	unknown	14.465	14.465	14.465	14.465	20.2902	18.3006	19.5825	14.465	2	0.0163	14.465	18.1596	3.69457	12.9472	0.0277
gi|172039592	cce_4679	6,7-dimethyl-8-ribityllumazine synthase, riboflavin synthase beta subunit	20.8353	20.7546	20.727	20.9792	20.5639	20.5087	21.0032	20.768	2	0.152	20.824	20.7109	-0.113077	0.924614	0.403
gi|172039595	cce_4682	putative phosphoglucomutases	22.6727	22.6088	22.4216	22.3112	22.1893	22.2461	21.9338	21.3082	3	0.024	22.5036	21.9193	-0.584256	0.666993	0.0443
gi|172039596	cce_4683	putative MscS mechanosensitive ion channel	21.3323	21.2531	21.3757	21.281	21.9841	21.9376	21.816	21.6541	2	0.0007	21.3105	21.848	0.537406	1.45136	0.00048
gi|172039600	cce_4687	transaldolase AB family	25.1382	25.1806	25.3654	25.0464	22.4919	21.6479	22.7162	22.1185	11	7.65e-05	25.1826	22.2436	-2.93902	0.130396	1.95e-05
gi|172039605	cce_4692	phosphoenolpyruvate synthase	23.4651	23.399	23.4352	23.6335	23.1103	23.3106	22.8082	23.3014	14	0.0195	23.4832	23.1326	-0.350591	0.784263	0.0343
gi|172039611	cce_4698	unknown	19.9224	20.2046	19.8292	18.6589	21.027	20.8788	20.9337	20.0436	2	0.0223	19.6538	20.7208	1.06698	2.09505	0.0406
gi|172039618	cce_4705	unknown	20.7533	21.0662	20.7416	20.6215	19.8221	14.465	14.465	19.7151	4	0.187	20.7956	17.1168	-3.67884	0.0780836	0.534
gi|172039629	cce_4716	circadian clock protein	19.0886	19.4494	19.3674	19.6883	19.3804	19.9434	19.7186	19.6316	2	0.0712	19.3984	19.6685	0.270099	1.20589	0.163
gi|172039630	cce_4717	NADH dehydrogenase subunit 7	24.7821	24.9539	25.0703	24.8793	24.542	24.4738	24.352	24.2381	13	0.0013	24.9214	24.4015	-0.519915	0.697413	0.00122
gi|172039631	cce_4718	GTP-binding protein	23.0642	23.0713	22.9196	23.2685	21.1317	21.6143	21.3974	22.1129	3	0.000684	23.0809	21.5641	-1.5168	0.349459	0.000458
gi|172039633	cce_4720	transcriptional Regulator, LuxR family	20.8543	20.5111	20.3222	20.5749	14.465	19.8931	20.7161	20.9626	2	0.156	20.5656	19.0092	-1.55642	0.339993	0.417
gi|172039648	cce_4735	D-alanine--D-alanine ligase	23.3426	23.3606	23.3068	23.1308	23.1607	22.9896	23.4403	23.1807	9	0.156	23.2852	23.1928	-0.0923865	0.93797	0.42
gi|172039654	cce_4741	unknown	21.0805	20.1526	20.8298	20.5771	19.4493	19.6756	19.6787	21.1607	2	0.077	20.66	19.9911	-0.66889	0.628991	0.18
gi|172039656	cce_4743	6-phosphogluconolactonase	22.6315	22.4953	22.832	23.0406	21.3614	21.4322	21.6839	21.94	8	0.000871	22.7498	21.6044	-1.14544	0.452051	0.000655
gi|172039657	cce_4744	unknown	25.5211	25.4019	25.4274	25.5491	25.3829	25.4912	25.5402	25.6805	10	0.184	25.4749	25.5237	0.0488544	1.03444	0.519
gi|172039671	cce_4758	fructose 1,6-bisphosphatase I	25.1826	25.3048	25.0997	24.7971	24.3053	23.8927	24.1601	24.1107	8	0.000607	25.096	24.1172	-0.97882	0.507395	0.000392
gi|172039673	cce_4760	NAD+ dependent glycerol-3-phosphate dehydrogenase	21.3644	21.6439	21.6703	21.7646	20.4542	21.1102	20.5125	20.049	6	0.00326	21.6108	20.5315	-1.07933	0.473249	0.00372
gi|172054908	cce_4821	5-methyltetrahydropteroyltriglutamate--homocysteine S-methyltransferase	23.909	23.8608	23.8602	23.8909	23.304	23.2931	23.3276	23.1024	21	8.61e-05	23.8802	23.2568	-0.62345	0.649117	2.36e-05
gi|172054934	cce_4848	hypothetical protein cce_4848	22.3702	21.8075	22.7802	22.1086	20.7947	22.2911	22.3297	22.0264	2	0.141	22.2666	21.8605	-0.406167	0.754626	0.367
gi|172054969	cce_4884	chromosome partitioning protein, ParB family	18.0747	19.3597	18.1735	20.0408	19.416	18.8978	18.3373	18.5892	2	0.263	18.9122	18.8101	-0.102111	0.931669	0.854
gi|172055054	cce_4969	unknown	21.4732	21.141	21.1234	20.9561	21.67	22.1053	22.227	21.3369	11	0.0169	21.1734	21.8348	0.661365	1.58158	0.0289
gi|172055154	cce_5069	DNA binding protein HU	20.1481	19.7365	19.6243	20.453	19.9878	19.9126	20.4592	20.8488	2	0.127	19.9905	20.3021	0.311629	1.24111	0.324
gi|172055257	cce_5172	unknown	23.1609	22.6161	23.1027	23.7016	21.9249	23.3521	23.5481	22.7889	2	0.2	23.1453	22.9035	-0.241847	0.845662	0.591
gi|172055258	cce_5173	unknown	19.8598	20.9916	20.7265	21.8265	23.3125	22.9101	22.5678	22.4794	3	0.00384	20.8511	22.8175	1.96635	3.90779	0.00458
gi|172055263	cce_5178	glucose-6-phosphate isomerase	24.3921	24.7254	24.4674	24.1682	23.9422	23.7521	23.7857	24.3254	3	0.0183	24.4383	23.9514	-0.48693	0.713542	0.0316
gi|172055269	cce_5184	putative D-xylulose 5-phosphate/D-fructose 6-phosphate phosphoketolase	24.7399	24.6414	24.5224	24.2975	24.7515	24.7158	24.8229	25.0925	7	0.0308	24.5503	24.8457	0.295373	1.2272	0.0602
gi|172055271	cce_5186	glycogen phosphorylase	26.7933	25.0125	26.444	27.4388	24.2987	24.9131	24.1534	24.0925	2	0.00701	26.4222	24.3644	-2.05774	0.240192	0.00933
gi|172055275	cce_5190	phosphate ABC transporter, ATP-binding protein	14.465	14.465	14.465	14.465	21.2203	21.3265	21.3687	19.7736	2	0.00122	14.465	20.9223	6.45729	87.8696	0.00112
gi|172034869	cce_5265	putative TrwC/TraI protein	22.1418	22.4479	22.3061	22.524	22.166	21.8246	22.4789	23.1322	2	0.269	22.3549	22.4004	0.0454909	1.03203	0.881
Notes:
Column headings	Description
GI	NCBI RefSeq GI number
Locus	NCBI locus tag
Protein Description	Description from ATCC 51142 NCBI accession # CP00806
AL_R1	Log2 protein abundance in ammonia-limited condition, replicate 1
AL_R2	Log2 protein abundance in ammonia-limited condition, replicate 2
AL_R3	Log2 protein abundance in ammonia-limited condition, replicate 3
AL_R4	Log2 protein abundance in ammonia-limited condition, replicate 4
LL_R1	Log2 protein abundance in light-limited condition, replicate 1
LL_R2	Log2 protein abundance in light-limited condition, replicate 2
LL_R3	Log2 protein abundance in light-limited condition, replicate 3
LL_R4	Log2 protein abundance in light-limited condition, replicate 4
AMT Peptide Count	Number of unique peptides identified per protein (across all datasets)
q-value	False discovery rate corresponding to each P-value
MeanAL	Arithmetic mean of 4 ammonia-limited replicates
MeanLL	Arithmetic mean of 4 light-limited replicates
MeanLL-MeanAL	Log2 fold-change (LL vs. AL)
fold change	Fold-change (LL vs. AL)
P-value (ANOVA)	ANOVA comparing LL to AL
